# Supplementary material
Source: publisher figshare collection journal article supplement (https://acs.figshare.com/ndownloader/files/8932963)
Supplement: Supplementary file 1 [file 8932963]

## Supporting Information

### Ni-Catalyzed Alkene Carboacylation via Amide C-N Bond Activation

James A. Walker Jr.,<sup>†</sup> Kevin L. Vickerman,<sup>†</sup> Jenna N. Humke and Levi M. Stanley\*

Department of Chemistry, Iowa State University, Ames, IA 50011, United States

Email: lstanley@iastate.edu

#### Table of Contents

|                                                                                                                        |       |
|------------------------------------------------------------------------------------------------------------------------|-------|
| General Experimental Details                                                                                           | S-1   |
| Materials                                                                                                              | S-2   |
| General Procedure A: Synthesis of Compounds <b>S2a-S2k</b>                                                             | S-3   |
| Characterization Data for Compounds <b>S2a-S2k</b>                                                                     | S-4   |
| General Procedure B: Synthesis of <i>o</i> -Allylbenzamides <b>1a, 3a-j</b>                                            | S-8   |
| Characterization Data for Compounds <b>1a, 3a-j</b>                                                                    | S-9   |
| General Procedure C: Synthesis of Compounds <b>2a-2t, 4a-j</b>                                                         | S-16  |
| Characterization Data for Compounds <b>2a-2t, 4a-j</b>                                                                 | S-17  |
| Nickel-Catalyzed Carboacylation of Ester <b>5</b>                                                                      | S-32  |
| Enantioselective $\alpha$ -Arylation to Form Compound <b>6</b>                                                         | S-33  |
| Experiment Procedures for Competition Experiments                                                                      | S-36  |
| <sup>1</sup> H, <sup>13</sup> C, and <sup>19</sup> F NMR Spectra for Compounds <b>S2a-S2k, 1a, 3a-3j, 2a-2t, 4a-4j</b> | S-39  |
| References                                                                                                             | S-110 |

#### General Experimental Details

All air-sensitive procedures were conducted under inert atmosphere in a nitrogen-filled dry box or by standard Schlenk techniques. All reactions were performed under an atmosphere of nitrogen unless otherwise stated. All glassware for moisture sensitive reactions were dried at 140 °C in an oven. Tetrahydrofuran, methylene chloride and *N,N*-dimethylformamide were degassed by purging with argon for 45 minutes and dried with a solvent purification system by passing through a one-meter column of activated alumina. Anhydrous 1,4-dioxane was purchased from

Sigma Aldrich. Flash column chromatography was performed on SiliFlash<sup>®</sup> P60 silica gel (40-63  $\mu\text{m}$ , 60 $\text{\AA}$ ) or using a Teledyne Isco Combiflash<sup>®</sup> Rf system with RediSep Gold<sup>TM</sup> columns using hexanes/ethyl acetate, dichloromethane/methanol, or pentane/ether mixtures as eluents. Reaction products were visualized on TLC by UV light or by staining with  $\text{KMnO}_4$ .

HRMS (ESI) analysis was performed at the Iowa State University Chemical Instrumentation Facility on an Agilent 6540 QTOF spectrometer. NMR spectra were acquired on Varian MR-400 and Bruker Avance III 600 spectrometers at the Iowa State University Chemical Instrumentation Facility. Chemical shifts are reported in ppm relative to a residual solvent peak ( $\text{CDCl}_3 = 7.26 \text{ ppm}$  for  $^1\text{H}$  and  $77.16 \text{ ppm}$  for  $^{13}\text{C}$ ).  $^{19}\text{F}$  NMR shifts are reported based on indirect reference to  $\text{CDCl}_3$ .<sup>1</sup>

## Materials

2-iodobenzoic acid (**S1a**) was purchased from Sigma Aldrich. 2-Iodo-5-methylbenzoic acid (**S1b**), 2-bromo-4-methylbenzoic acid (**S1c**), 2-iodo-5-methoxybenzoic acid (**S1d**), 2-bromo-4-methoxybenzoic acid (**S1e**), 2-bromo-6-fluorobenzoic acid (**S1f**), 2-bromo-4-fluorobenzoic acid (**S1g**), 2-bromo-3-fluorobenzoic acid (**S1h**), 2-bromo-5-(trifluoromethyl)benzoic acid (**S1i**), 2-iodo-4-(trifluoromethyl)benzoic acid (**S1j**), and 2-bromo-4,5-difluorobenzoic acid (**S1k**) were purchased from Combi-Blocks. Arylboronic acid pinacol esters were synthesized according to known a literature procedure.<sup>2</sup> Tetrakis(triphenylphosphine), cesium fluoride, and di-*tert*-butyl dicarbonate were purchased from Ak Scientific. Tribasic potassium phosphate was purchased from Sigma Aldrich. Bis(1,5-cyclooctadiene)nickel(0), and 1,3-bis(2,6-di-*i*-propylphenyl)-4,5-dihydroimidazol-2-ylidene were purchased from Strem Chemicals.

## General Procedure A: Synthesis of *o*-Halobenzamides S2a-S2k:

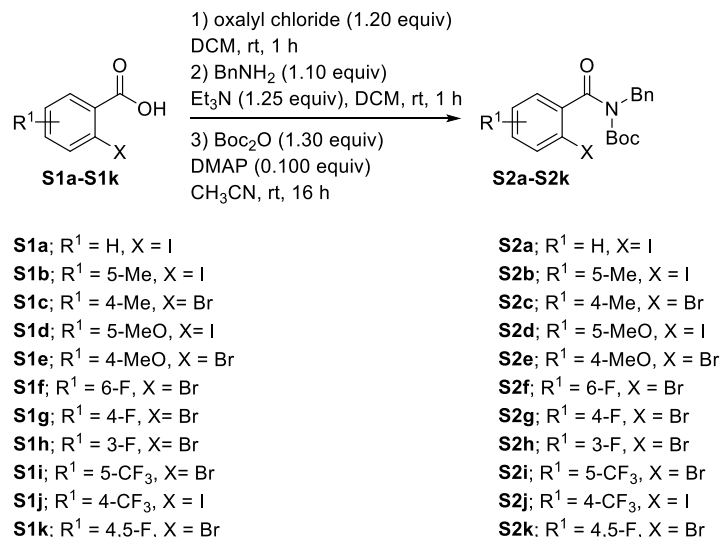

*o*-Halobenzamides (**S2a-S2k**) were prepared from the appropriate *o*-halobenzoic acid (**S1a-S1k**).

To the appropriate *o*-halobenzoic acid (**S1a-S1k**) in anhydrous DCM (0.3 M) at 0 °C under N<sub>2</sub> was added 2 M oxalyl chloride (1.20 equiv) dropwise and a catalytic amount of DMF (1-2 drops). The reaction was allowed to warm to room temperature and stirred for 1 h. The solvent was removed under reduced pressure to afford the corresponding crude acid chloride. To the crude acid chloride was added DCM (0.9 M) and triethylamine (1.25 equiv). Next, a solution of benzylamine (1.10 equiv) in DCM (0.5 M) was added dropwise. The reaction mixture was stirred at room temperature for 1 h, then diluted with ethyl acetate, and washed successively with 1M HCl and brine. The organic layer was dried over anhydrous sodium sulfate, and concentrated under reduced pressure. The resulting crude material was used directly in the next step. To the round-bottom flask containing the crude benzamide was added DMAP (0.10 equiv), acetonitrile (0.2 M) and Boc<sub>2</sub>O (1.30 equiv). The reaction flask was then flushed with N<sub>2</sub> and allowed to stir at room temperature for 16 h. The reaction was quenched by addition of water, and extracted with ethyl acetate (3x). The organic layers were combined, dried over Na<sub>2</sub>SO<sub>4</sub>, filtered, and evaporated under reduced

pressure. The resulting crude *o*-halobenzamides (**S2a-S2k**) were used directly in the next step without further purification.

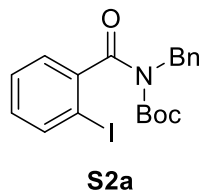

**tert-butyl benzyl(2-iodobenzoyl)carbamate (S2a):** Prepared according to general procedure A from *o*-iodobenzoic acid **S1a** (7.61 g, 30.7 mmol). The reactions afforded crude product **S2a** as white solid in 80% yield (10.7 g, 24.7 mmol). **<sup>1</sup>H NMR** (400 MHz, CDCl<sub>3</sub>) δ 1.14 (s, 9H), 5.05 (s, 2H), 7.07 (td, *J* = 7.1, 1.5 Hz, 1H), 7.17 (dd, *J* = 7.6, 1.2 Hz, 1H), 7.29 (d, *J* = 7.2 Hz, 1H), 7.31-7.38 (m, 3H), 7.47 (d, *J* = 8.0 Hz, 2H), 7.80 (d, *J* = 8.0 Hz, 1H). **<sup>13</sup>C NMR** (101 MHz, CDCl<sub>3</sub>) δ 27.5, 47.6, 83.9, 91.7, 127.0, 127.6, 127.9, 128.5, 128.6, 130.3, 137.5, 139.2, 144.6, 15.1, 171.6. **HRMS** (ESI): Calcd. for C<sub>19</sub>H<sub>21</sub>INO<sub>3</sub><sup>+</sup> ([M+H]<sup>+</sup>): 438.0561, Found: 438.0556.

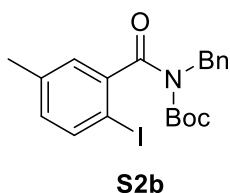

**tert-butyl benzyl(2-iodo-5-methylbenzoyl)carbamate (S2b):** Prepared according to general procedure A from 2-iodo-5-methylbenzoic acid **S1b** (2.62 g, 10.0 mmol). The reactions afforded crude product **S2b** as a colorless oil in 91% yield (4.01 g, 9.10 mmol). **<sup>1</sup>H NMR** (400 MHz, CDCl<sub>3</sub>) δ 1.16 (s, 9H), 2.30 (s, 3H), 5.05 (s, 2H), 6.90 (dd, *J* = 8.1, 1.5 Hz, 1H), 7.01 (d, *J* = 1.5 Hz, 1H), 7.28 (t, *J* = 7.2 Hz, 1H), 7.32-7.38 (m, 2H), 7.48 (d, *J* = 7.2 Hz, 2H), 7.66 (d, *J* = 8.1 Hz, 1H). **<sup>13</sup>C NMR** (101 MHz, CDCl<sub>3</sub>) δ 21.0, 27.5, 48.0, 83.7, 87.5, 127.5, 127.9, 128.5, 128.6, 131.3, 137.5, 138.1, 138.9, 144.3, 152.1, 171.8. **HRMS** (ESI): Calcd. for C<sub>20</sub>H<sub>23</sub>INO<sub>3</sub><sup>+</sup> ([M+H]<sup>+</sup>): 452.0717, Found: 452.0720.

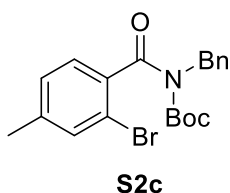

**tert-butyl benzyl(2-bromo-4-methylbenzoyl)carbamate (S2c):** Prepared according to general procedure A from 2-bromo-4-methylbenzoic acid **S1c** (2.15 g, 10.0 mmol). The reactions afforded crude product **S2c** as a colorless oil in 83% yield (3.36 g, 8.32 mmol). **<sup>1</sup>H NMR** (400 MHz, CDCl<sub>3</sub>) δ 1.17 (s, 9H), 2.35 (s, 3H), 5.05 (s, 2H), 7.12-7.18 (m, 2H), 7.26-7.30 (m, 1H), 7.32-7.37 (m, 3H), 7.45-7.47 (m, 2H). **<sup>13</sup>C**



**NMR** (101 MHz, CDCl<sub>3</sub>)  $\delta$  27.5, 48.0, 83.6, 118.5, 127.4, 127.7, 128.0, 128.4, 128.5, 133.0, 133.1, 137.5, 137.6, 140.9, 152.3, 170.5. **HRMS** (ESI): Calcd. for C<sub>20</sub>H<sub>23</sub>BrNO<sub>3</sub><sup>+</sup> ([M+H]<sup>+</sup>): 404.0856, Found: 404.0828.

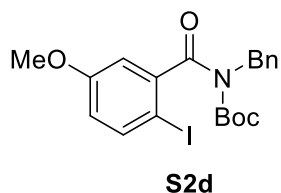

**tert-butyl benzyl(2-iodo-5-methoxybenzoyl)carbamate (S2d):** Prepared according to general procedure A from 2-iodo-5-methoxybenzoic acid **S1d** (2.78 g, 10.0 mmol). The reactions afforded crude product **S2d** as a colorless oil in 81% yield (3.79 g, 8.10 mmol). **<sup>1</sup>H NMR** (400 MHz, CDCl<sub>3</sub>)  $\delta$  1.17 (s, 9H), 3.75 (s, 3H), 5.04 (s, 2H), 6.67 (dd, *J* = 8.7, 3.0 Hz, 1H), 6.74 (d, *J* = 3.0 Hz, 1H), 7.28 (d, *J* = 7.3 Hz, 1H), 7.31-7.37 (m, 2H), 7.47 (d, *J* = 7.3 Hz, 2H), 7.63 (d, *J* = 8.7 Hz, 1H). **<sup>13</sup>C NMR** (101 MHz, CDCl<sub>3</sub>)  $\delta$  27.5, 48.0, 55.6, 80.1, 83.8, 112.9, 116.9, 127.5, 128.5, 128.6, 137.4, 139.8, 145.2, 152.0, 159.7, 171.3. **HRMS** (ESI): Calcd. for C<sub>20</sub>H<sub>23</sub>INO<sub>4</sub><sup>+</sup> ([M+H]<sup>+</sup>): 468.0666, Found: 468.0665.

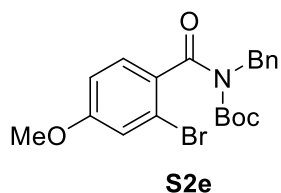

**tert-butyl benzyl(2-bromo-4-methoxybenzoyl)carbamate (S2e):** Prepared according to general procedure A from 2-bromo-4-methoxybenzoic acid **S1e** (2.31 g, 10.0 mmol). The reactions afforded crude product **S2e** as a yellow oil in 90% yield (3.80 g, 9.00 mmol). **<sup>1</sup>H NMR** (400 MHz, CDCl<sub>3</sub>)  $\delta$  1.19 (s, 9H), 3.81 (s, 3H), 5.03 (s, 2H), 6.86 (dd, *J* = 8.6, 2.4 Hz, 1H), 7.07 (d, *J* = 2.4 Hz, 1H), 7.21 (d, *J* = 8.6 Hz, 1H), 7.26-7.29 (m, 1H), 7.31-7.35 (m, 2H), 7.42-7.46 (m, 2H). **<sup>13</sup>C NMR** (101 MHz, CDCl<sub>3</sub>)  $\delta$  27.6, 48.2, 53.6, 55.8, 83.5, 113.2, 118.1, 119.7, 127.5, 128.5, 129.2, 132.6, 137.7, 152.4, 160.7, 170.5. **HRMS** (ESI): Calcd. for C<sub>20</sub>H<sub>22</sub>BrNO<sub>4</sub><sup>+</sup>Na ([M+Na]<sup>+</sup>): 442.0624, Found: 442.0587.

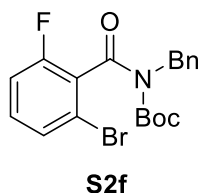

**tert-butyl benzyl(2-bromo-6-fluorobenzoyl)carbamate (S2f):** Prepared

according to general procedure A from 2-bromo-6-fluorobenzoic acid **S1f** (2.19 g, 10.0 mmol). The reactions afforded crude product **S2f** as a white solid in 75%

yield (3.05 g, 7.50 mmol). **<sup>1</sup>H NMR** (400 MHz, CDCl<sub>3</sub>) δ 1.18 (s, 9H), 5.10 (s,

2H), 7.04-7.08 (m, 1H), 7.21 (m, 1H), 7.24-7.30 (m, 1H), 7.31-7.37 (m, 3H), 7.41-7.45 (m, 2H).

**<sup>13</sup>C NMR** (101 MHz, CDCl<sub>3</sub>) δ 27.5, 47.6, 84.2, 114.6 (d, *J* = 21.2 Hz, 1C), 119.2 (d, *J* = 5.05 Hz, 1C), 127.5, 128.1, 128.3 (d, *J* = 4.04 Hz, 1C), 128.5, 129.7, (d, *J* = 21.2 Hz, 1C), 130.6 (d, *J* = 8.08

Hz, 1C), 137.2, 151.6, 158.4 (d *J* = 252.5 Hz, 1C), 165.4. **<sup>19</sup>F NMR** (CDCl<sub>3</sub>, 376 MHz): δ -114.1

(m, 1F). **HRMS** (ESI): Calcd. for C<sub>19</sub>H<sub>19</sub>BrFNO<sub>3</sub><sup>+</sup>Na ([M+Na]<sup>+</sup>): 430.0425, Found: 430.0387.

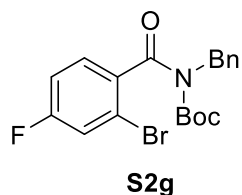

**tert-butyl benzyl(2-bromo-4-fluorobenzoyl)carbamate (S2g):** Prepared

according to general procedure A from 2-bromo-4-fluorobenzoic acid **S1g** (2.19 g, 10.0 mmol). The reactions afforded crude product **S2g** as a white

solid in 85% yield (3.47 g, 8.50 mmol). **<sup>1</sup>H NMR** (400 MHz, CDCl<sub>3</sub>) δ 1.20 (s, 9H), 5.04 (s, 2H),

7.06 (td, *J* = 8.0, 2.5 Hz, 1H), 7.24-7.36 (m, 5H), 7.43-7.45 (m, 2H). **<sup>13</sup>C NMR** (101 MHz, CDCl<sub>3</sub>)

δ 27.6, 48.1, 84.0, 114.7 (d, *J* = 21.2, 1C), 119.3 (d, *J* = 9.09 Hz, 1C), 120.0 (d, *J* = 13.1 Hz, 1C),

120.2 (d, *J* = 14.1 Hz, 1C), 127.6, 128.5, 129.2, 136.7 (d, *J* = 4.04 Hz, 1C), 137.4, 152.1, 162.5 (d,

*J* = 254.5 Hz, 1C), 169.6. **<sup>19</sup>F NMR** (CDCl<sub>3</sub>, 376 MHz): δ -109.4 (m, 1F). **HRMS** (ESI): Calcd.

for C<sub>19</sub>H<sub>19</sub>BrFNO<sub>3</sub><sup>+</sup>Na ([M+Na]<sup>+</sup>): 430.0425, Found: 430.0384.

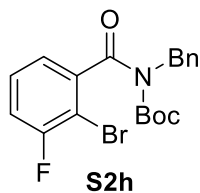

**tert-butyl benzyl(2-bromo-3-fluorobenzoyl)carbamate (S2h):** Prepared

according to general procedure A from 2-bromo-3-fluorobenzoic acid **S1h** (2.19 g, 10.0 mmol). The reactions afforded crude product **S2h** as a white solid in 84%

yield (3.43 g, 8.40 mmol). **<sup>1</sup>H NMR** (400 MHz, CDCl<sub>3</sub>) δ 1.17 (s, 9H), 5.06 (s, 2H), 7.04 (dt, *J* =

7.6, 1.0 Hz, 1H), 7.14 (td,  $J = 8.4, 1.4$  Hz, 1H), 7.27-7.37 (m, 4H), 7.42-7.47 (m, 2H).  $^{13}\text{C}$  NMR (101 MHz,  $\text{CDCl}_3$ )  $\delta$  27.5, 47.9, 84.1, 106.4 (d,  $J = 23.2$  Hz, 1C), 116.7 (d,  $J = 22.2$  Hz, 1C), 122.8 (d,  $J = 3.0$  Hz, 1C), 127.7, 128.5, 128.6, 128.9 (d,  $J = 8.1$  Hz, 1C), 137.3, 142.6, 151.9, 159.0 (d,  $J = 248.5$  Hz, 1C), 169.1.  $^{19}\text{F}$  NMR ( $\text{CDCl}_3$ , 376 MHz):  $\delta$  -106.1 (m, 1F). HRMS (ESI): Calcd. for  $\text{C}_{19}\text{H}_{19}\text{BrFNO}_3^+\text{Na}$  ( $[\text{M}+\text{Na}]^+$ ): 430.0425, Found: 430.0393.

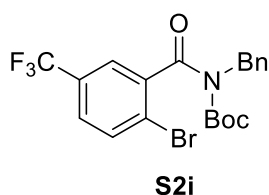

**tert-butyl benzyl(2-bromo-5-(trifluoromethyl)benzoyl)carbamate**

**(S2i):** Prepared according to general procedure A from 2-bromo-5-(trifluoromethyl)benzoic acid **S1i** (2.69 g, 10.0 mmol). The reactions afforded crude product **S2i** as a white solid in 88% yield (4.03 g, 8.80 mmol).  $^1\text{H}$  NMR (400 MHz,  $\text{CDCl}_3$ )  $\delta$  1.16 (s, 9H), 5.07 (s, 2H), 7.28-7.38 (m, 3H), 7.45-7.51 (m, 4H), 7.67 (d,  $J = 8.2$  Hz, 1H).  $^{13}\text{C}$  NMR (101 MHz,  $\text{CDCl}_3$ )  $\delta$  27.5, 48.0, 84.4, 122.5, 124.7 (q,  $J = 3.8$  Hz, 1C), 126.1 (q,  $J = 274.0$  Hz, 1C), 126.8 (q,  $J = 3.7$  Hz, 1C), 127.7, 128.6, 128.6, 130.3, 133.3, 137.1, 141.4, 151.7, 168.9.  $^{19}\text{F}$  NMR ( $\text{CDCl}_3$ , 376 MHz):  $\delta$  -62.9 (s, 3F). HRMS (ESI): Calcd. for  $\text{C}_{20}\text{H}_{19}\text{BrF}_3\text{NO}_3^+\text{Na}$  ( $[\text{M}+\text{Na}]^+$ ): 480.0393, Found: 480.0344.

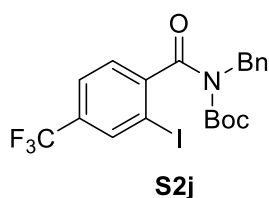

**tert-butyl benzyl(2-iodo-4-(trifluoromethyl)benzoyl)carbamate (S2j):**

Prepared according to general procedure A from 2-iodo-4-(trifluoromethyl)benzoic acid **S1j** (3.16 g, 10.0 mmol). The reactions afforded crude product **S2j** as a colorless oil in 91% yield (4.60 g, 9.10 mmol).  $^1\text{H}$  NMR (400 MHz,  $\text{CDCl}_3$ )  $\delta$  1.19 (s, 9H), 5.08 (s, 2H), 7.27-7.38 (m, 4H), 7.49 (d,  $J = 8.0$  Hz, 2H), 7.64 (dd,  $J = 8.0, 0.9$  Hz, 1H), 8.06 (s, 1H).  $^{13}\text{C}$  NMR (101 MHz,  $\text{CDCl}_3$ )  $\delta$  27.6, 47.8, 84.5, 91.1, 122.7 (q,  $J = 274.7$ , 1C), 124.5 (d,  $J = 22.2$  Hz, 1C), 126.9 (d,  $J = 11.1$  Hz, 1C), 127.7 (q,  $J = 6.1$  Hz, 1C), 128.6 (m, 1C), 128.7 (d,  $J = 9.1$  Hz, 1C), 132.0 (q,  $J = 33.3$  Hz, 1C), 135.9 (dd,  $J = 15.2, 4.0$  Hz,

1C), 137.1, 148.1, 151.6, 170.5.  $^{19}\text{F}$  NMR ( $\text{CDCl}_3$ , 376 MHz):  $\delta$  -62.8 (s, 3F). HRMS (ESI): Calcd. for  $\text{C}_{20}\text{H}_{20}\text{F}_3\text{INO}_3^+$  ( $[\text{M}+\text{H}]^+$ ): 506.0434, Found: 506.0450.

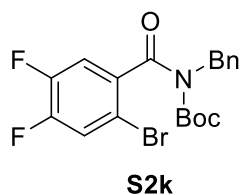

**tert-butyl benzyl(2-bromo-4,5-difluorobenzoyl)carbamate (S2k):**

Prepared according to general procedure A from 2-bromo-4,5-difluorobenzoic acid **S1k** (2.37 g, 10.0 mmol). The reactions afforded crude product **S2k** as a white solid in 74% yield (3.16 g, 7.40 mmol).  $^1\text{H}$  NMR (400 MHz,  $\text{CDCl}_3$ )  $\delta$  1.24 (s, 9H), 5.03 (s, 2H), 7.14 (dd,  $J$  = 9.8, 7.9 Hz, 1H), 7.27-7.43 (m, 6H).  $^{13}\text{C}$  NMR (101 MHz,  $\text{CDCl}_3$ )  $\delta$  27.6, 48.1, 84.4, 112.6 (dd,  $J$  = 7.4, 4.1 Hz, 1C), 116.9, 117.1 (d,  $J$  = 2.0 Hz, 1C), 127.7, 128.5, 128.6 (d,  $J$  = 2.0 Hz, 1C), 137.0 (dd,  $J$  = 6.1, 5.1 Hz, 1C), 137.1, 149.7 (dd,  $J$  = 252.5, 13.1 Hz, 1C), 150.4 (dd,  $J$  = 257.6, 14.1 Hz, 1C), 151.9, 168.4.  $^{19}\text{F}$  NMR ( $\text{CDCl}_3$ , 376 MHz):  $\delta$  -137.8 (m, 1F), -133.4 (m, 1F). HRMS (ESI): Calcd. for  $\text{C}_{19}\text{H}_{19}\text{BrF}_2\text{NO}_3^+$  ( $[\text{M}+\text{H}]^+$ ): 426.0511, Found: 426.0502.

**General Procedure B: Synthesis of *o*-Allylbenzamides **1a**, **3a-j****

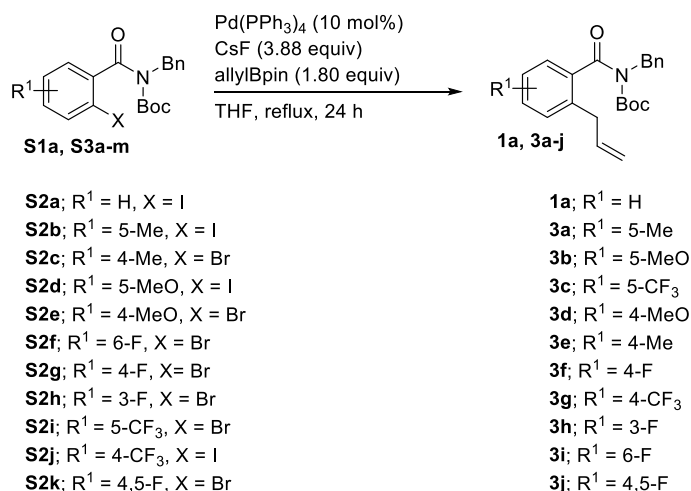

*o*-Allylbenzamides (**1a**, **3a-j**) were prepared according to the following procedure. A round-bottom flask was charged with 3.00 mmol of *o*-iodobenzamide (**S2a-S2k**), CsF (1.77 g, 11.6

mmol), Pd(PPh<sub>3</sub>)<sub>4</sub> (0.347 g, 0.300 mmol), and THF (37.5 mL). The resulting solution was stirred at room temperature for 30 minutes. Then 2-allyl-4,4,5,5-tetramethyl-1,3,2-dioxaborolane (allylBpin) (0.907 g, 5.40 mmol) in THF (37.5 mL) was added. The resulting solution was stirred at reflux for 24 hours. The reaction mixture was diluted with hexanes (100 mL) followed by water (100 mL). The layers were separated, and the organic layer extracted with hexanes (2 x 100 mL). The combined organic layers were washed with water (200 mL) and brine (200 mL), dried over Na<sub>2</sub>SO<sub>4</sub>, filtered, and concentrated under reduced pressure. Purifications of the crude products were carried out by flash column chromatography to give *o*-allylbenzamides **1a**, **3a-j**.

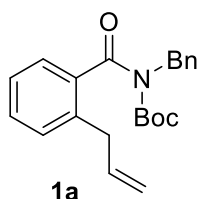

***tert*-butyl (2-allylbenzoyl)(benzyl)carbamate (**1a**):** Prepared according to general procedure B from *tert*-butyl benzyl(2-iodobenzoyl)carbamate **S2a** (1.31 g, 3.00 mmol). The crude reaction mixture was purified by flash column

chromatography (100:0 hexanes:EtOAc to 90:10 hexanes EtOAc) to give **1a** as a colorless oil in 79% yield (0.830 g, 2.37 mmol). <sup>1</sup>H NMR (400 MHz, CDCl<sub>3</sub>) δ 1.08 (s, 9H), 3.45 (d, *J* = 6.8 Hz, 1H), 5.03 (s, 2H), 5.03-5.10 (m, 2H), 5.92 (ddt, *J* = 17.0, 10.0, 6.8 Hz, 1H), 7.12 (d, *J* = 7.6 Hz, 1H), 7.19 (t, *J* = 7.6 Hz, 1H), 7.22-7.37 (m, 5H), 7.45 (d, *J* = 7.4 Hz, 2H). <sup>13</sup>C NMR (101 MHz, CDCl<sub>3</sub>) δ 27.5, 37.6, 48.1, 83.4, 116.6, 125.9, 126.1, 127.5, 128.4, 128.6, 129.6, 129.8, 136.6, 137.3, 137.9, 138.2, 153.0, 172.4. HRMS (ESI): Calcd. for C<sub>22</sub>H<sub>26</sub>NO<sub>3</sub><sup>+</sup> ([M+H]<sup>+</sup>): 352.1907, Found: 352.1883.

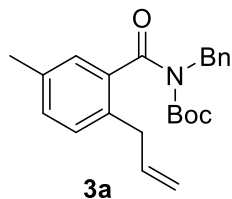

***tert*-butyl (2-allyl-5-methylbenzoyl)(benzyl)carbamate (**3a**):** Prepared according to general procedure B from *tert*-butyl (2-iodo-5-methylbenzoyl)(benzyl)carbamate **S2b** (1.35 g, 3.00 mmol). The crude

reaction mixture was purified by flash column chromatography (100:0 hexanes:EtOAc to 90:10

Hexanes:EtOAc) to give **3a** as a colorless oil in 78% yield (0.856 g, 2.34 mmol). **<sup>1</sup>H NMR** (400 MHz, CDCl<sub>3</sub>) δ 1.09 (s, 9H), 2.30 (s, 3H), 3.41 (d, *J* = 8.0 Hz, 2H), 5.03 (s, 2H), 5.01-5.08 (m, 2H), 5.91 (ddt, *J* = 17.0, 10.0, 8.0 Hz, 1H), 6.96 (s, 1H), 7.11-7.16 (m, 2H), 7.26-7.30 (m, 1H), 7.33-7.37 (m, 2H), 7.45-7.47 (m, 2H). **<sup>13</sup>C NMR** (101 MHz, CDCl<sub>3</sub>) δ 20.9, 27.4, 37.2, 48.1, 83.3, 116.2, 126.7, 127.5, 128.4, 128.5, 129.8, 130.3, 134.3, 135.4, 136.81, 137.9, 137.9, 153.1, 172.5. **HRMS** (ESI): Calcd. for C<sub>23</sub>H<sub>28</sub>NO<sub>3</sub><sup>+</sup> ([M+H]<sup>+</sup>): 366.2064, Found: 366.2024.

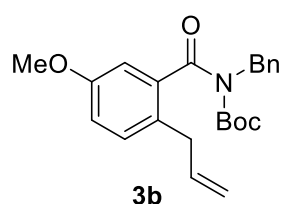

***tert*-butyl (2-allyl-5-methoxybenzoyl)(benzyl)carbamate (**3b**):** Prepared according to general procedure B from *tert*-butyl benzyl(2-iodo-5-methoxybenzoyl)carbamate **S2d** (1.40 g, 3.00 mmol). The crude reaction mixture was purified by flash column chromatography (100:0 hexanes:EtOAc to 90:10 hexanes:EtOAc) to give **3b** as a dark-green oil in 61% yield (0.698 g, 1.83 mmol). **<sup>1</sup>H NMR** (400 MHz, CDCl<sub>3</sub>) δ 1.14 (s, 9H), 3.38 (d, *J* = 6.8 Hz, 2H), 3.76 (s, 3H), 5.02-5.08 (m, 2H), 5.04 (s, 2H), 5.91 (ddt, *J* = 17.0, 10.1, 6.8 Hz, 1H), 6.69 (d, *J* = 2.8 Hz, 1H), 6.89 (dd, *J* = 8.5, 2.8 Hz, 1H), 7.16 (d, *J* = 8.5 Hz, 1H), 7.28-7.31 (m, 1H), 7.34-7.38 (m, 2H), 7.46-7.48 (m, 2H). **<sup>13</sup>C NMR** (101 MHz, CDCl<sub>3</sub>) δ 27.5, 36.7, 48.1, 55.5, 83.4, 111.5, 115.4, 116.1, 127.5, 128.4, 128.5, 129.2, 130.9, 136.9, 137.8, 138.9, 152.9, 157.6, 172.1. **HRMS** (ESI): Calcd. for C<sub>23</sub>H<sub>27</sub>NO<sub>4</sub><sup>+</sup>Na ([M+Na]<sup>+</sup>): 404.1832, Found: 404.1786.

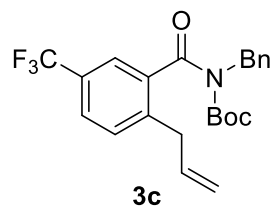

***tert*-butyl (2-allyl-5-(trifluoromethyl)benzoyl)(benzyl)carbamate (**3c**):** Prepared according to general procedure B from *tert*-butyl benzyl(2-bromo-5-(trifluoromethyl)benzoyl)carbamate **S2i** (1.37 g, 3.00 mmol). The crude reaction mixture was purified by flash column chromatography (100:0 hexanes:EtOAc to 95:5 hexanes:EtOAc) to give **3c** as a colorless oil as an 84:16 mixture of **3c** and the olefin

isomerization product in 70% yield (0.879 g, 2.10 mmol). **<sup>1</sup>H NMR** (400 MHz, CDCl<sub>3</sub>) δ 1.10 (s, 9H), 3.46 (d, *J* = 6.8 Hz, 2H), 5.05 (s, 2H), 5.06-5.11 (m, 2H), 5.81-5.93 (m, 1H), 7.27-7.40 (m, 5H), 7.45 (d, *J* = 7.2 Hz, 2H) 7.58 (dd, *J* = 7.9, 3.1 Hz, 1H). **<sup>13</sup>C NMR** (101 MHz, CDCl<sub>3</sub>) δ 27.3, 37.3, 48.0, 83.9, 117.4, 122.9 (q, *J* = 3.7 Hz, 1C), 125.9 (q, *J* = 3.8 Hz, 1C), 127.0 (q, *J* = 273.4 Hz, 1C), 127.6, 128.3, 128.5, 128.7, 130.2, 131.5, 135.2, 137.3, 138.7, 141.0, 152.3, 170.8,. **<sup>19</sup>F NMR** (376 MHz, CDCl<sub>3</sub>) δ -62.6 (m, 1F). **HRMS** (ESI): Calcd. for C<sub>23</sub>H<sub>25</sub>F<sub>3</sub>NO<sub>3</sub><sup>+</sup> ([M+H]<sup>+</sup>): 420.1781, Found: 420.1720.

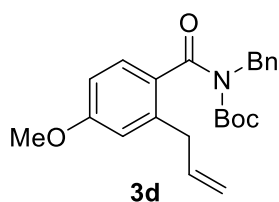

**tert-butyl benzyl(2-allyl-4-methoxybenzoyl)carbamate (3d):** Prepared according to general procedure B from *tert*-butyl benzyl(2-bromo-4-methoxybenzoyl)carbamate **S2e** (1.26 g, 3.00 mmol). The crude reaction mixture was purified by flash column chromatography (100:0 hexanes:EtOAc to 90:10 hexanes:EtOAc) to give **3d** as a colorless oil in 34% yield (0.386 g, 1.01 mmol). **<sup>1</sup>H NMR** (400 MHz, CDCl<sub>3</sub>) δ 1.13 (s, 9H), 3.48 (d, *J* = 6.8 Hz, 2H), 3.80 (s, 3H), 4.99 (s, 2H), 5.04-5.12 (m, 2H), 5.92 (ddt, *J* = 17.2, 10.0, 6.8 Hz, 1H), 6.70 (dd, *J* = 8.5, 2.4 Hz, 1H), 6.78 (d, *J* = 2.4 Hz, 1H), 7.12 (d, *J* = 8.5 Hz, 1H), 7.24-7.29 (m, 1H), 7.31-7.35 (m, 2H), 7.42-7.44 (m, 2H). **<sup>13</sup>C NMR** (101 MHz, CDCl<sub>3</sub>) δ 27.6, 37.7, 48.4, 55.4, 83.1, 110.9, 115.5, 116.6, 127.5, 128.3, 128.4, 128.5, 130.5, 136.5, 138.0, 140.2, 153.3, 160.8, 172.4. **HRMS** (ESI): Calcd. for C<sub>23</sub>H<sub>27</sub>NO<sub>4</sub><sup>+</sup>Na ([M+Na]<sup>+</sup>): 404.1832, Found: 404.1782.

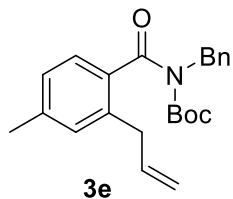

**tert-butyl (2-allyl-4-methylbenzoyl)(benzyl)carbamate (3e):** Prepared according to general procedure B from *tert*-butyl benzyl(2-bromo-4-methylbenzoyl)carbamate **S2c** (1.21 g, 3.00 mmol). The crude reaction mixture was purified by flash column chromatography (100:0 hexanes:EtOAc to 90:10

hexanes:EtOAc) to give **3e** as a colorless oil in 28% yield (0.310 g, 0.848 mmol). **<sup>1</sup>H NMR** (400 MHz, CDCl<sub>3</sub>) δ 1.11 (s, 9H), 2.34 (s, 3H), 3.44 (d, *J* = 8.0 Hz, 2H), 5.01 (s, 2H), 5.05-5.10 (m, 2H), 5.93 (ddt, *J* = 17.0, 10.0, 6.9 Hz, 1H), 6.99 (d, *J* = 8.0 Hz, 1H), 7.05 (d, *J* = 8.0 Hz, 1H), 7.05-7.07 (m, 1H), 7.24-7.30 (m, 1H), 7.30-7.37 (m, 2H), 7.44 (d, *J* = 8.0 Hz, 2H). **<sup>13</sup>C NMR** (101 MHz, CDCl<sub>3</sub>) δ 21.5, 27.5, 37.6, 48.2, 83.2, 116.3, 126.4, 126.5, 127.5, 128.3, 128.5, 130.6, 135.3, 136.8, 137.5, 138.0, 139.8, 153.1, 172.6. **HRMS** (ESI): Calcd. for C<sub>23</sub>H<sub>28</sub>NO<sub>3</sub><sup>+</sup> ([M+H]<sup>+</sup>): 366.2064, Found: 366.2027.

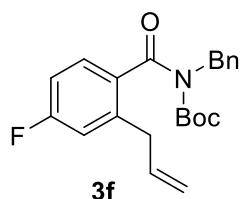

**tert-butyl (2-allyl-4-fluorobenzoyl)(benzyl)carbamate (3f):** Prepared according to general procedure B from *tert*-butyl benzyl(2-bromo-4-fluorobenzoyl)carbamate **S2g** (1.22 g, 3.00 mmol). The crude reaction

mixture was purified by flash column chromatography (100:0 hexanes:EtOAc to 90:10 hexanes:EtOAc) to give **3f** as a colorless oil in 51% yield (0.568 g, 1.54 mmol). **<sup>1</sup>H NMR** (400 MHz, CDCl<sub>3</sub>) δ 1.14 (s, 9H), 3.44 (d, *J* = 6.9 Hz, 2H), 5.01 (s, 2H), 5.06-5.12 (m, 2H), 5.89 (ddt, *J* = 17.4, 9.6, 6.9 Hz, 1H), 6.89 (td, *J* = 8.5, 2.4 Hz, 1H), 6.97 (dd, *J* = 9.8, 2.4 Hz, 1H), 7.12 (dd, *J* = 8.5, 5.7 Hz, 1H), 7.26-7.30 (m, 1H), 7.32-7.36 (m, 2H), 7.42-7.44 (m, 2H). **<sup>13</sup>C NMR** (101 MHz, CDCl<sub>3</sub>) δ 27.6, 37.4, 48.2, 83.6, 112.8 (d, *J* = 21.2 Hz, 1C), 116.7 (d, *J* = 22.2 Hz, 1C), 117.4, 127.61, 128.1 (d, *J* = 9.1 Hz, 1C), 128.4, 128.6, 134.3 (d, *J* = 3.0 Hz, 1C), 135.6, 137.7, 140.6 (d, *J* = 7.1 Hz, 1C), 152.9, 163.3 (d, *J* = 250.5 Hz, 1C), 171.6. **<sup>19</sup>F NMR** (376 MHz, CDCl<sub>3</sub>) δ -110.9 (m, 1F). **HRMS** (ESI): Calcd. for C<sub>22</sub>H<sub>24</sub>FNO<sub>3</sub><sup>+</sup>Na ([M+Na]<sup>+</sup>): 392.1632, Found: 392.1596.



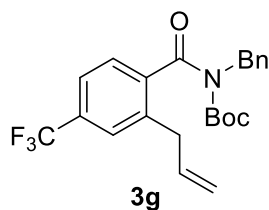

***tert*-butyl (2-allyl-4-(trifluoromethyl)benzoyl)(benzyl)carbamate (**3g**):**

Prepared according to general procedure B from *tert*-butyl benzyl(2-iodo-4-(trifluoromethyl)benzoyl)carbamate **S2j** (1.52 g, 3.00 mmol). The crude reaction mixture was purified by flash column chromatography (100:0 hexanes:EtOAc to 90:10 hexanes:EtOAc) to give **3g** as a colorless oil in 81% yield (1.02 g, 2.43 mmol). **<sup>1</sup>H NMR** (400 MHz, CDCl<sub>3</sub>) δ 1.12 (s, 9H), 3.45 (d, *J* = 6.8 Hz, 2H), 5.05 (s, 2H), 5.06-5.12 (m, 2H), 5.89 (ddt, *J* = 16.8, 10.3, 6.8 Hz, 1H), 7.23 (d, *J* = 8.0 Hz, 1H), 7.27-7.32 (m, 1H), 7.34-7.38 (m, 2H), 7.43-7.51 (m, 4H). **<sup>13</sup>C NMR** (101 MHz, CDCl<sub>3</sub>) δ 22.5, 37.4, 47.9, 84.1, 117.7, 122.9 (q, *J* = 3.75 Hz, 1C), 126.1, 126.5 (q, *J* = 4.0 Hz, 1C), 127.0 (q, *J* = 274.1 Hz, 1C), 127.7, 128.5, 128.6, 131.2, 135.2, 137.5, 137.9, 141.8, 152.4, 171.1. **<sup>19</sup>F NMR** (376 MHz, CDCl<sub>3</sub>) δ -62.6 (s, 3F). **HRMS** (ESI): Calcd. for C<sub>23</sub>H<sub>24</sub>F<sub>3</sub>NO<sub>3</sub><sup>+</sup>Na ([M+Na]<sup>+</sup>): 442.1600, Found: 442.1550.

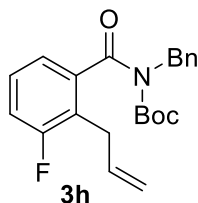

***tert*-butyl (2-allyl-3-fluorobenzoyl)(benzyl)carbamate (**3h**):**

Prepared according to general procedure B from *tert*-butyl benzyl(3-fluoro-2-bromobenzoyl)carbamate **S2h** (1.22 g, 3.00 mmol). The crude reaction mixture was purified by flash column chromatography (100:0 hexanes:EtOAc to 90:10 hexanes:EtOAc) to give **3h** as a colorless oil in 71% yield (0.787 g, 2.13 mmol). **<sup>1</sup>H NMR** (400 MHz, CDCl<sub>3</sub>) δ 1.12, (s, 9H), 3.43 (d, *J* = 6.0 Hz, 2H), 4.97-5.05 (m, 2H), 5.03 (s, 2H), 5.89 (ddt, *J* = 17.1, 10.0, 6.6 Hz, 1H), 6.93 (dd, *J* = 7.6, 0.6 Hz, 1H), 7.05-7.09 (m, 1H), 7.18 (m, 1H), 7.27-7.30 (m, 1H), 7.33-7.37 (m, 2H), 7.43-7.45 (m, 2H). **<sup>13</sup>C NMR** (101 MHz, CDCl<sub>3</sub>) δ 27.5, 30.7, 48.0, 83.8, 116.27, 116.3, 116.5, 121.7 (d, *J* = 3.0 Hz, 1C), 124.6 (d, *J* = 17.2 Hz, 1C), 127.4 (d, *J* = 9.1 Hz, 1C), 127.6, 128.5 (d, *J* = 15.2 Hz, 1C), 135.2, 137.7, 140.4 (d, *J* = 5.1 Hz, 1C), 152.7, 161.4 (d, *J* = 248.5 Hz, 1C),

170.9 (d,  $J = 3.0$  Hz, 1C).  **$^{19}\text{F}$  NMR** (376 MHz,  $\text{CDCl}_3$ )  $\delta$  -116.6 (m, 1F). **HRMS** (ESI): Calcd. for  $\text{C}_{22}\text{H}_{24}\text{FNO}_3^+\text{Na}$  ( $[\text{M}+\text{Na}]^+$ ): 392.1632, Found: 392.1587.

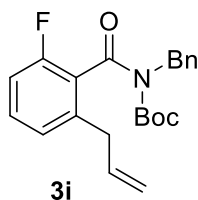

***tert*-butyl (2-allyl-6-fluorobenzoyl)(benzyl)carbamate (3i):** Prepared according to general procedure B from *tert*-butyl benzyl(2-bromo-6-fluorobenzoyl)carbamate **S2f** (1.22 g, 3.00 mmol). The crude reaction mixture

was purified by flash column chromatography (100:0 hexanes:EtOAc to 90:10 hexanes:EtOAc) to give **3i** as a colorless oil in 89% yield (0.984 g, 2.66 mmol).  **$^1\text{H}$  NMR** (400 MHz,  $\text{CDCl}_3$ )  $\delta$  1.16 (s, 9H), 3.37 (dd,  $J = 22.6, 7.2$  Hz, 2H), 4.99-5.05 (m, 2H), 5.09 (d,  $J = 4.6$  Hz, 2H), 5.86 (ddt,  $J = 17.6, 9.6, 6.8$  Hz, 1H), 6.91 (t,  $J = 9.6$  Hz, 1H), 7.03 (d,  $J = 7.6$  Hz, 1H), 7.24-7.30 (m, 2H), 7.32-7.36 (m, 2H), 7.42-7.44 (m, 2H).  **$^{13}\text{C}$  NMR** (101 MHz,  $\text{CDCl}_3$ )  $\delta$  27.4 (d,  $J = 4.0$  Hz, 1C), 37.4, 47.6, 83.7, 112.9, 113.1, 116.9, 125.3 (d,  $J = 2.0$  Hz, 1C), 126.9 (d,  $J = 17.2$  Hz, 1C), 127.8 (d,  $J = 74.7$  Hz, 1C), 128.5, 130.1 (d,  $J = 8.1$  Hz, 1C), 135.8 (d,  $J = 6.1$  Hz, 1C), 137.6, 139.1 (d,  $J = 3.0$  Hz, 1C), 152.1, 158.3 (d,  $J = 247.5$  Hz, 1C), 167.25.  **$^{19}\text{F}$  NMR** (376 MHz,  $\text{CDCl}_3$ )  $\delta$  -117.7 (m, 1F). **HRMS** (ESI): Calcd. for  $\text{C}_{22}\text{H}_{24}\text{FNO}_3^+\text{Na}$  ( $[\text{M}+\text{Na}]^+$ ): 392.1632, Found: 392.1598.

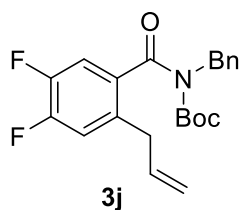

***tert*-butyl (2-allyl-4,5-difluorobenzoyl)(benzyl)carbamate (3j):** Prepared according to general procedure B from *tert*-butyl benzyl(4,5-difluoro-2-bromobenzoyl)carbamate **S2k** (1.28 g, 3.00 mmol). The crude reaction

mixture was purified by flash column chromatography (100:0 DCM:EtOAc to 90:10 DCM:EtOAc) to give **3j** as a colorless oil in 61% yield (0.709 g, 1.83 mmol).  **$^1\text{H}$  NMR** (400 MHz,  $\text{CDCl}_3$ )  $\delta$  1.19 (s, 9H), 3.36 (d,  $J = 6.8$  Hz, 2H), 5.00 (s, 2H), 5.03-5.10 (m, 2H), 5.84 (ddt,  $J = 16.9, 10.2, 6.8$  Hz, 1H), 6.97 (dd,  $J = 10.2, 7.8$  Hz, 1H), 7.06 (dd,  $J = 11.2, 7.6$  Hz, 1H), 7.27-7.31 (m, 1H), 7.33-7.38 (m, 2H), 7.39-7.43 (m, 2H).  **$^{13}\text{C}$  NMR** (101 MHz,  $\text{CDCl}_3$ )  $\delta$  27.5, 36.6, 48.1,

83.9, 115.3 (d,  $J = 19.2$  Hz, 1C), 117.4, 118.5 (d,  $J = 18.2$  Hz, 1C), 127.6, 128.36 (d,  $J = 29.3$  Hz, 1C), 128.37 (d,  $J = 10.1$  Hz, 1C), 134.2 (dd,  $J = 5.1$  Hz, 1C), 134.5 (dd,  $J = 5.1$  Hz, 1C), 135.3, 137.3, 148.2 (dd,  $J = 249.6, 13.2$  Hz, 1C), 150.5 (dd,  $J = 248.2, 12.6$  Hz, 1C), 152.4, 170.1.  $^{19}\text{F}$  NMR (376 MHz,  $\text{CDCl}_3$ )  $\delta$  -141.3 (m, 1F) -135.8 (m, 1F). HRMS (ESI): Calcd. for  $\text{C}_{22}\text{H}_{23}\text{F}_2\text{NO}_3^+\text{Na}$  ( $[\text{M}+\text{Na}]^+$ ): 410.1538, Found: 410.1492.

## General Procedure C: Synthesis of 2-Benzyl-2,3-dihydro-1*H*-inden-1-ones **2a-2t**, **4a-4j**

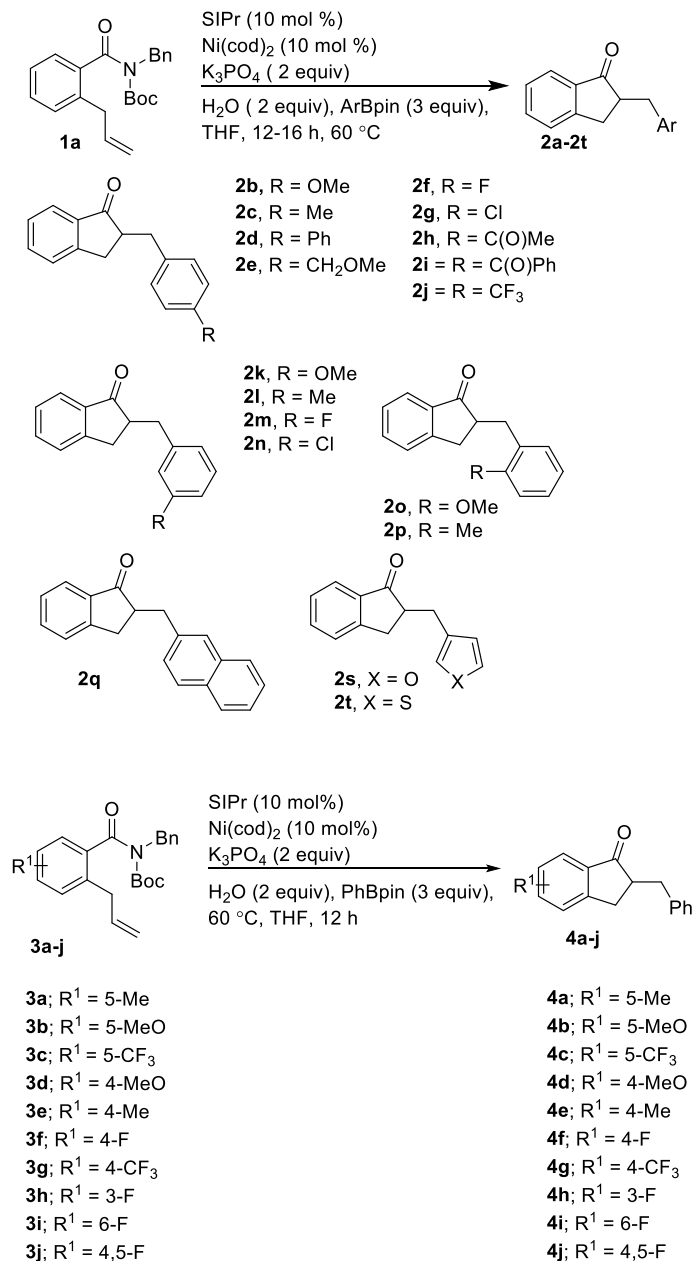

2-benzyl-2,3-dihydro-1*H*-inden-1-ones **2a-2t**, **4a-4j** were prepared by the following procedure. A 1-dram vial was charged with 0.100 mmol of the appropriate *o*-allylbenzamide **1a**, **3a-3j**, Ni(cod)<sub>2</sub> (2.8 mg, 0.010 mmol), SIPr (3.9 mg, 0.010 mmol), K<sub>3</sub>PO<sub>4</sub> (42.5 mg, 0.200 mmol), H<sub>2</sub>O (3.6 μL, 0.20 mmol), the appropriate ArBpin (0.300 mmol), and THF (0.10-0.20 mL, 0.50-1.0 M). The

resulting solution stirred at 60 °C for 12-16 hours. Upon completion of the reaction, the reaction mixture was filtered through a short plug of silica gel eluting with 70:30 hexanes:EtOAc and concentrated under reduced pressure. The crude product was purified by column chromatography with a gradient of 100:0 hexanes:EtOAc to 90:10 hexanes:EtOAc over a 25 minute period on a Combiflash system.

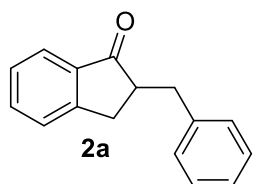

**2-benzyl-2,3-dihydro-1H-inden-1-one (2a):** Prepared according to general procedure C from *tert*-butyl (2-allylbenzoyl)(benzyl)carbamate **1a** (35.1 mg, 0.100 mmol) and phenylboronic acid pinacol ester (61.2 mg, 0.300 mmol).

The crude reaction mixture was purified by flash column chromatography (100:0 hexanes:EtOAc to 90:10 hexanes:EtOAc) to give **2a** as a colorless oil in 97% yield (21.6 mg, 0.097 mmol). <sup>1</sup>H NMR (400 MHz, CDCl<sub>3</sub>) δ 2.68 (dd, *J* = 14.0, 10.4 Hz, 1H), 2.88 (dd, *J* = 17.2, 4.0 Hz, 1H), 2.97-3.06 (m, 1H), 3.18 (dd, *J* = 17.2, 7.8 Hz, 1H), 3.42 (dd, *J* = 14.0, 4.2 Hz, 1H), 7.20-7.34 (m, 5H), 7.35-7.43 (m, 2H), 7.58 (t, *J* = 7.6 Hz, 1H), 7.80 (d, *J* = 7.6 Hz, 1H). <sup>13</sup>C NMR (101 MHz, CDCl<sub>3</sub>) δ 32.3, 37.1, 49.1, 124.1, 126.5, 126.7, 127.5, 128.6, 129.0, 134.9, 136.7, 139.8, 153.7, 207.9. HRMS (ESI): Calcd. for C<sub>16</sub>H<sub>14</sub>O<sup>+</sup>Na ([M+Na]<sup>+</sup>): 245.0937, Found: 245.0902.

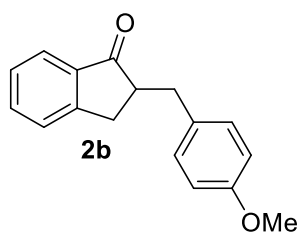

**2-(4-methoxybenzyl)-2,3-dihydro-1H-inden-1-one (2b):** Prepared according to general procedure C from *tert*-butyl (2-allylbenzoyl)(benzyl)carbamate **1a** (35.1 mg, 0.100 mmol) and 4-methoxyphenylboronic acid pinacol ester (70.2 mg, 0.300 mmol). The

crude reaction mixture was purified by flash column chromatography (100:0 hexanes:EtOAc to 90:10 hexanes:EtOAc) to give **2b** as a colorless oil in 98% yield (24.8 mg, 0.098 mmol). <sup>1</sup>H NMR (400 MHz, CDCl<sub>3</sub>) δ 2.65 (dd, *J* = 14.0, 10.1 Hz, 1H), 2.86 (dd, *J* = 17.2, 4.0 Hz, 1H), 2.93-3.00

(m, 1H), 3.17 (dd,  $J = 17.2, 7.7$  Hz, 1H), 3.31 (dd,  $J = 14.0, 4.3$  Hz, 1H), 3.79 (s, 3H), 6.84 (ddd,  $J = 8.7, 3.0, 2.1$  Hz, 2H), 7.16 (ddd,  $J = 8.7, 3.0, 2.0$  Hz, 2H), 7.35-7.41 (m, 2H), 7.57 (ddd,  $J = 7.6, 7.6, 1.2$  Hz, 1H), 7.78 (d,  $J = 8.0$  Hz, 1H).  $^{13}\text{C}$  NMR (101 MHz,  $\text{CDCl}_3$ )  $\delta$  32.2, 36.2, 49.3, 55.4, 114.0, 124.1, 126.7, 127.5, 130.0, 131.7, 134.9, 136.7, 153.8, 158.3, 208.1. **HRMS** (ESI): Calcd. for  $\text{C}_{17}\text{H}_{17}\text{O}_2^+$  ( $[\text{M}+\text{H}]^+$ ): 253.1223, Found: 253.1225.

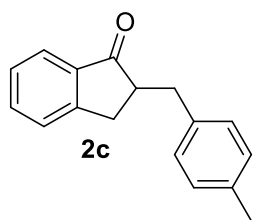

**2-(4-methylbenzyl)-2,3-dihydro-1H-inden-1-one (2c):** Prepared

according to general procedure C from *tert*-butyl (2-allylbenzoyl)(benzyl)carbamate **1a** (35.1 mg, 0.100 mmol) and 4-tolylboronic acid pinacol ester (65.4 mg, 0.300 mmol). The crude reaction mixture was purified by flash column chromatography (100:0 hexanes:EtOAc to 90:10 hexanes:EtOAc) to give **2c** as a colorless oil in 99% yield (23.4 mg, 0.099 mmol).  $^1\text{H}$  NMR (400 MHz,  $\text{CDCl}_3$ )  $\delta$  2.33 (s, 3H), 2.64 (dd,  $J = 14.0, 10.4$  Hz, 1H), 2.86 (dd,  $J = 17.2, 3.9$  Hz, 1H), 2.95-3.02 (m, 1H), 3.17 (dd,  $J = 17.2, 7.8$  Hz, 1H), 3.36 (dd,  $J = 14.0, 4.2$  Hz, 1H), 7.10-7.15 (m, 4H), 7.35-7.41 (m, 2H), 7.57 (ddd,  $J = 7.6, 7.6, 1.1$  Hz, 1H), 7.78 (d,  $J = 7.7$  Hz, 1H).  $^{13}\text{C}$  NMR (101 MHz,  $\text{CDCl}_3$ )  $\delta$  21.3, 32.3, 36.7, 49.2, 124.1, 126.6, 127.5, 128.9, 129.3, 134.8, 136.0, 136.66, 136.73, 153.8, 208.1. **HRMS** (ESI): Calcd. for  $\text{C}_{17}\text{H}_{17}\text{O}^+$  ( $[\text{M}+\text{H}]^+$ ): 237.1274, Found: 237.1272.

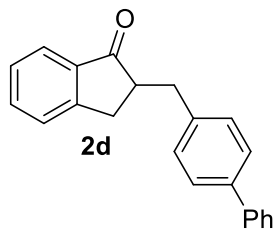

**2-([1,1'-biphenyl]-4-ylmethyl)-2,3-dihydro-1H-inden-1-one (2d):**

Prepared according to general procedure C from *tert*-butyl (2-allylbenzoyl)(benzyl)carbamate **1a** (35.1 mg, 0.100 mmol) and 4-biphenylboronic acid pinacol ester (84.1 mg, 0.300 mmol). The crude reaction mixture was purified by flash column chromatography (100:0 hexanes:EtOAc to 90:10 hexanes:EtOAc) to give **2d** as a colorless oil in 94% yield (27.9 mg, 0.094 mmol).  $^1\text{H}$  NMR (400

MHz, CDCl<sub>3</sub>)  $\delta$  2.73 (dd,  $J$  = 14.0, 10.4 Hz, 1H), 2.91 (dd,  $J$  = 17.2, 4.0 Hz, 1H), 3.02-3.08 (m, 1H), 3.23 (dd,  $J$  = 17.2, 7.8 Hz, 1H), 3.44 (dd,  $J$  = 14.0, 4.3 Hz, 1H), 7.32-7.46 (m, 7H), 7.53-7.60 (m, 5H), 7.81 (d,  $J$  = 7.5 Hz, 1H). <sup>13</sup>C NMR (101 MHz, CDCl<sub>3</sub>)  $\delta$  32.4, 36.8, 49.0, 124.2, 126.7, 127.1, 127.3, 127.4, 127.6, 128.9, 129.5, 135.0, 136.7, 138.9, 139.4, 141.0, 153.8, 207.9. HRMS (ESI): Calcd. for C<sub>22</sub>H<sub>19</sub>O<sup>+</sup> ([M+H]<sup>+</sup>): 299.1430, Found: 299.1433.

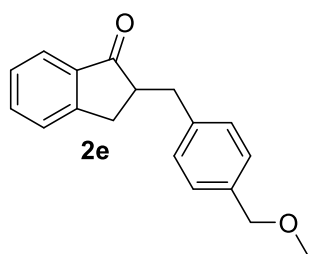

**2-(4-(methoxymethyl)benzyl)-2,3-dihydro-1H-inden-1-one (2e):**

Prepared according to general procedure C from *tert*-butyl (2-allylbenzoyl)(benzyl)carbamate **1a** (35.1 mg, 0.100 mmol) and 4-(methoxymethyl)phenylboronic acid pinacol ester (74.4 mg, 0.300 mmol). The crude reaction mixture was purified by flash column chromatography (100:0 hexanes:EtOAc to 90:10 hexanes:EtOAc) to give **2e** as a colorless oil in 78% yield (20.7 mg, 0.078 mmol). <sup>1</sup>H NMR (400 MHz, CDCl<sub>3</sub>)  $\delta$  2.68 (dd,  $J$  = 13.8, 11.0 Hz, 1H), 2.84 (dd,  $J$  = 17.2, 3.8 Hz, 1H), 2.96-3.03 (m, 1H), 3.16 (dd,  $J$  = 17.1, 7.8 Hz, 1H), 3.36-3.40 (m, 4H), 4.42 (s, 2H), 7.22-7.28 (m, 4H), 7.34-7.40 (m, 2H), 7.56 (dd,  $J$  = 7.5, 7.5 Hz, 1H), 7.78 (d,  $J$  = 7.7 Hz, 1H). <sup>13</sup>C NMR (101 MHz, CDCl<sub>3</sub>)  $\delta$  32.3, 36.8, 49.0, 58.3, 74.6, 124.2, 126.7, 127.6, 128.2, 129.1, 134.9, 136.4, 136.8, 138.2, 153.8, 207.91. HRMS (ESI): Calcd. for C<sub>18</sub>H<sub>19</sub>O<sub>2</sub><sup>+</sup> ([M+H]<sup>+</sup>): 267.1380, Found: 267.1383.

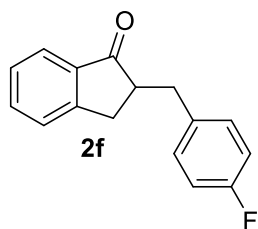

**2-(4-fluorobenzyl)-2,3-dihydro-1H-inden-1-one (2f):**

Prepared according to general procedure C from *tert*-butyl (2-allylbenzoyl)(benzyl)carbamate **1a** (35.1 mg, 0.100 mmol) and 4-fluorophenylboronic acid pinacol ester (66.7 mg, 0.300 mmol). The crude reaction mixture was purified by flash column chromatography (100:0 hexanes:EtOAc to 90:10 hexanes:EtOAc) to give **2f** as a colorless

oil in 98% yield (23.6 mg, 0.098 mmol). **<sup>1</sup>H NMR** (400 MHz, CDCl<sub>3</sub>) δ 2.70 (dd, *J* = 14.0, 10.0 Hz, 1H), 2.83 (dd, *J* = 17.1, 4.0 Hz, 1H), 2.93-3.00 (m, 1H), 3.18 (dd, *J* = 17.1, 7.8 Hz, 1H), 3.33 (dd, *J* = 14.0, 4.3 Hz, 1H), 6.95-7.00 (m, 2H), 7.18-7.21 (m, 2H), 7.35-7.41 (m, 2H), 7.57 (ddd, *J* = 7.7, 7.7, 1.0 Hz, 1H), 7.77 (d, *J* = 7.6 Hz, 1H). **<sup>13</sup>C NMR** (101 MHz, CDCl<sub>3</sub>) δ 32.2, 36.2, 49.0, 115.4 (d, *J* = 21.0 Hz), 124.2, 126.7, 127.6, 130.5 (d, *J* = 7.8 Hz), 135.0, 135.3 (d, *J* = 3.2 Hz), 136.6, 153.6, 161.6 (d, *J* = 243 Hz), 207.7. **<sup>19</sup>F NMR** (376 MHz, CDCl<sub>3</sub>) δ -116.9 (m, 1F). **HRMS** (ESI): Calcd. for C<sub>16</sub>H<sub>14</sub>FO<sup>+</sup> ([M+H]<sup>+</sup>): 241.1023, Found: 241.1023.

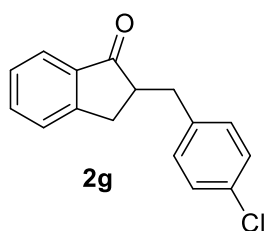

**2-(4-chlorobenzyl)-2,3-dihydro-1H-inden-1-one (2g):** Prepared

according to general procedure C from *tert*-butyl (2-allylbenzoyl)(benzyl)carbamate **1a** (35.1 mg, 0.100 mmol) and 4-chlorophenylboronic acid pinacol ester (71.5 mg, 0.300 mmol). The crude reaction mixture was purified by flash column chromatography (100:0 hexanes:EtOAc to 90:10 hexanes:EtOAc) to give **2g** as a colorless oil in 85% yield (21.8 mg, 0.085 mmol). **<sup>1</sup>H NMR** (400 MHz, CDCl<sub>3</sub>) δ 2.70 (dd, *J* = 14.0, 10.0 Hz, 1H), 2.83 (dd, *J* = 17.2, 4.2 Hz, 1H), 2.94-3.00 (m, 1H), 3.18 (dd, *J* = 17.1, 7.8 Hz, 1H), 3.34 (dd, *J* = 14.0, 4.4 Hz, 1H), 7.18 (d, *J* = 8.5, 2H), 7.26 (d, *J* = 8.5 Hz, 2H), 7.36-7.42 (m, 2H), 7.58 (td, *J* = 7.6, 1.2 Hz, 1H), 7.78 (d, *J* = 7.7 Hz, 1H). **<sup>13</sup>C NMR** (101 MHz, CDCl<sub>3</sub>) δ 32.2, 36.4, 48.8, 124.3, 126.7, 127.7, 128.8, 130.4, 132.3, 135.1, 136.6, 138.1, 153.6, 207.6. **HRMS** (ESI): Calcd. for C<sub>16</sub>H<sub>14</sub>ClO<sup>+</sup> ([M+H]<sup>+</sup>): 257.0728, Found: 257.0726.

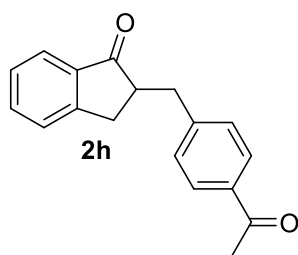

**2-(4-acetylbenzyl)-2,3-dihydro-1H-inden-1-one (2h):** Prepared

according to general procedure C from *tert*-butyl (2-allylbenzoyl)(benzyl)carbamate **1a** (35.1 mg, 0.100 mmol) and 4-acetylboronic acid pinacol ester (73.8 mg, 0.300 mmol). The crude reaction mixture was purified by flash column chromatography (100:0 hexanes:EtOAc to 90:10



hexanes:EtOAc) to give **2h** as a white solid in 76 % yield (20.1 mg, 0.076 mmol). **<sup>1</sup>H NMR** (400 MHz, CDCl<sub>3</sub>) δ 2.58 (s, 3H), 2.75-2.85 (m, 2H), 2.98-3.05 (m, 1H), 3.18 (dd, *J* = 17.1, 7.9 Hz, 1H), 3.42 (dd, *J* = 14.0, 4.4 Hz, 1H), 7.34 (d, *J* = 8.1 Hz, 2H), 7.39 (dd, *J* = 7.5, 7.5 Hz, 2H), 7.58 (dd, *J* = 7.5, 7.5 Hz, 1H), 7.78 (d, *J* = 7.6 Hz, 1H), 7.90 (d, *J* = 7.7 Hz, 1H). **<sup>13</sup>C NMR** (101 MHz, CDCl<sub>3</sub>) δ 23.7, 32.2, 37.0, 48.6, 124.2, 126.7, 127.7, 128.8, 129.3, 135.1, 135.7, 136.5, 145.5, 153.5, 197.9, 207.4. **HRMS** (ESI): Calcd. for C<sub>18</sub>H<sub>17</sub>O<sub>2</sub><sup>+</sup> ([M+H]<sup>+</sup>): 265.1223, Found: 265.1226.

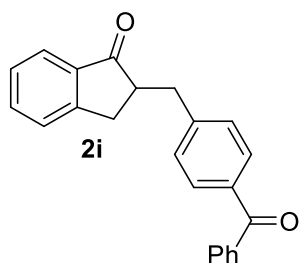

**2-(4-benzoylbenzyl)-2,3-dihydro-1H-inden-1-one (2i):** Prepared

according to general procedure C from *tert*-butyl (2-allylbenzoyl)(benzyl)carbamate **1a** (35.1 mg, 0.100 mmol) and 4-benzoylphenylboronic acid pinacol ester (92.5 mg, 0.300 mmol). The crude reaction mixture was purified by flash column chromatography (100:0 hexanes:EtOAc to 80:20 hexanes:EtOAc) to give **2i** as a white solid in 54% yield (17.5 mg, 0.054 mmol). **<sup>1</sup>H NMR** (400 MHz, CDCl<sub>3</sub>) δ 2.80 (dd, *J* = 14.0, 10.2 Hz, 1H), 2.87 (dd, *J* = 17.1, 3.9 Hz, 1H), 3.02-3.08 (m, 1H), 3.22 (dd, *J* = 17.0, 7.8 Hz, 1H), 3.47 (dd, *J* = 17.0, 4.3 Hz, 1H), 7.36-7.43 (m, 4H), 7.47-7.50 (m, 2H), 7.57-7.61 (m, 2H), 7.75-7.80 (m, 5H). **<sup>13</sup>C NMR** (101 MHz, CDCl<sub>3</sub>) δ 32.3, 37.1, 48.7, 124.2, 126.7, 127.7, 128.4, 129.0, 130.1, 130.6, 132.4, 135.1, 135.9, 136.5, 137.8, 144.9, 153.5, 196.5, 207.4. **HRMS** (ESI): Calcd. for C<sub>23</sub>H<sub>19</sub>O<sub>2</sub><sup>+</sup> ([M+H]<sup>+</sup>): 327.1380, Found: 327.1382.

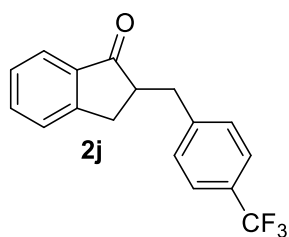

**2-(4-(trifluoromethyl)benzyl)-2,3-dihydro-1H-inden-1-one (2j):**

Prepared according to general procedure C from *tert*-butyl (2-allylbenzoyl)(benzyl)carbamate **1a** (35.1 mg, 0.100 mmol) and 4-(trifluoromethyl)phenylboronic acid pinacol ester (81.6 mg, 0.300 mmol). The crude reaction mixture was purified by flash column chromatography (100:0 hexanes:EtOAc to 90:10 hexanes:EtOAc) to give **2j** as colorless oil in 69% yield (19.9 mg, 0.069 mmol). **<sup>1</sup>H NMR**

(400 MHz, CDCl<sub>3</sub>)  $\delta$  2.74-2.85 (m, 2H), 2.93-3.00 (m, 1H), 3.20 (dd,  $J$  = 17.0, 7.8 Hz, 1H), 3.43 (dd,  $J$  = 14.0, 4.3 Hz, 1H), 7.35-7.42 (m, 4H), 7.55-7.61 (m, 3H), 7.79 (d,  $J$  = 7.7 Hz, 1H). <sup>13</sup>C NMR (101 MHz, CDCl<sub>3</sub>)  $\delta$  32.3, 36.9, 48.7, 110.2, 124.3, 125.6 (q,  $J$  = 3.8 Hz), 126.7, 127.8, 129.1 (q,  $J$  = 235 Hz), 129.4, 132.6, 135.2, 136.5, 143.9, 207.31. <sup>19</sup>F NMR (376 MHz, CDCl<sub>3</sub>)  $\delta$  -62.4 (s, 1F). HRMS (ESI): Calcd. for C<sub>17</sub>H<sub>14</sub>F<sub>3</sub>O<sup>+</sup> ([M+H]<sup>+</sup>): 291.0991, Found: 291.0992.

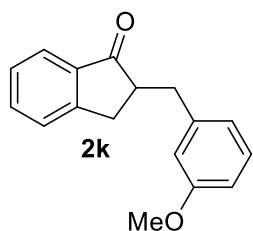

**2-(3-methoxybenzyl)-2,3-dihydro-1H-inden-1-one (2k):** Prepared according to general procedure C from *tert*-butyl (2-allylbenzoyl)(benzyl)carbamate **1a** (35.1 mg, 0.100 mmol) and 3-methoxyphenylboronic acid pinacol ester (70.2 mg, 0.300 mmol). The crude reaction mixture was purified by flash column chromatography (100:0 hexanes:EtOAc to 90:10 hexanes:EtOAc) to give **2k** as a colorless oil in 96% yield (24.3 mg, 0.096 mmol). <sup>1</sup>H NMR (400 MHz, CDCl<sub>3</sub>)  $\delta$  2.64 (dd,  $J$  = 13.9, 10.5 Hz, 1H), 2.87 (dd,  $J$  = 17.2, 4.0 Hz, 1H), 2.96-3.03 (m, 1H), 3.18 (dd,  $J$  = 17.2, 7.8 Hz, 1H), 3.38 (dd,  $J$  = 14.0, 4.2 Hz, 1H), 3.79 (s, 3H), 6.75-6.85 (m, 3H), 7.22 (dd,  $J$  = 7.9, 7.9 Hz, 1H), 7.35-7.42 (m, 2H), 7.57 (ddd,  $J$  = 7.6, 7.6, 1.2 Hz, 1H), 7.78 (d,  $J$  = 7.7 Hz, 1H). <sup>13</sup>C NMR (101 MHz, CDCl<sub>3</sub>)  $\delta$  32.4, 37.2, 49.0, 55.3, 111.8, 114.7, 121.4, 124.2, 126.7, 127.6, 129.6, 135.0, 136.7, 141.4, 153.8, 160.0, 207.9. HRMS (ESI): Calcd. for C<sub>17</sub>H<sub>17</sub>O<sub>2</sub><sup>+</sup> ([M+H]<sup>+</sup>): 253.1223, Found: 253.1227.

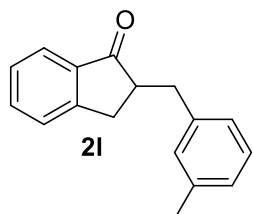

**2-(3-methylbenzyl)-2,3-dihydro-1H-inden-1-one (2l):** Prepared according to general procedure C from *tert*-butyl (2-allylbenzoyl)(benzyl)carbamate **1a** (35.1 mg, 0.100 mmol) and 3-tolylboronic acid pinacol ester (65.4 mg, 0.300 mmol). The crude reaction mixture was purified by flash column chromatography (100:0 hexanes:EtOAc to 90:10 hexanes:EtOAc) to give **2l** as a white solid in

85% yield (20.0 mg, 0.085 mmol). **<sup>1</sup>H NMR** (400 MHz, CDCl<sub>3</sub>) δ 2.34 (s, 3), 2.61 (dd, *J* = 13.9, 10.6 Hz, 1H), 2.86 (dd, *J* = 17.2, 3.9 Hz, 1H), 2.96-3.03 (m, 1H), 3.17 (dd, *J* = 17.2, 7.7 Hz, 1H), 3.38 (dd, *J* = 13.9, 4.1 Hz, 1H), 7.03-7.07 (m, 3H), 7.19 (dd, *J* = 7.5 Hz, 1H), 7.36-7.42 (m, 2H), 7.58 (d, *J* = 7.7 Hz, 1H) 7.79 (d, *J* = 7.6 Hz, 1H). **<sup>13</sup>C NMR** (101 MHz, CDCl<sub>3</sub>) δ 21.5, 32.4, 37.1, 49.1, 124.1, 126.0, 126.8, 127.2, 127.6, 128.6, 129.8, 134.8, 136.7, 138.3, 139.8, 153.8, 208.0. **HRMS** (ESI): Calcd. for C<sub>17</sub>H<sub>17</sub>O<sup>+</sup> ([M+H]<sup>+</sup>): 237.1274, Found: 237.1276.

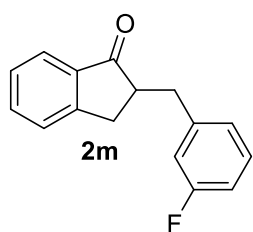

**2-(3-fluorobenzyl)-2,3-dihydro-1H-inden-1-one (2m):** Prepared according to general procedure C from *tert*-butyl (2-allylbenzoyl)(benzyl)carbamate **1a** (35.1 mg, 0.100 mmol) and 3-fluorophenylboronic acid pinacol ester (66.7 mg, 0.300 mmol). The crude reaction mixture was purified by flash column chromatography (100:0 hexanes:EtOAc to 90:10 hexanes:EtOAc) to give **2m** as a colorless oil in 67% yield (16.1 mg, 0.067 mmol). **<sup>1</sup>H NMR** (400 MHz, CDCl<sub>3</sub>) δ 2.68 (dd, *J* = 14.0, 10.3 Hz, 1H), 2.84 (dd, *J* = 17.1, 4.1 Hz, 1H), 2.95-3.02 (m, 1H), 3.20 (dd, *J* = 17.2, 7.8 Hz, 1H), 3.38 (dd, *J* = 14.0, 4.3 Hz, 1H), 6.89-6.97 (m, 2H), 7.02 (d, *J* = 7.6 Hz, 1H), 7.23-7.28 (m, 1H), 7.36-7.42 (m, 2H), 7.58 (ddd, *J* = 7.7, 7.7, 1.1 Hz, 1H), 7.78 (d, *J* = 7.7 Hz, 1H). **<sup>13</sup>C NMR** (101 MHz, CDCl<sub>3</sub>) δ 32.3, 36.8, 48.8, 113.4 (d, *J* = 21.0 Hz), 115.9 (d, *J* = 21.0 Hz), 124.2, 124.7 (d, *J* = 2.8 Hz), 126.7, 127.7, 130.1 (d, *J* = 8.3 Hz), 135.6, 136.6, 142.3 (d, *J* = 7.2 Hz), 153.6, 163.0 (d, *J* = 245 Hz), 207.5. **<sup>19</sup>F NMR** (376 MHz, CDCl<sub>3</sub>) δ -113.3 (m, 1F). **HRMS** (ESI): Calcd. for C<sub>16</sub>H<sub>14</sub>FO<sup>+</sup> ([M+H]<sup>+</sup>): 241.1023, Found: 241.1023.

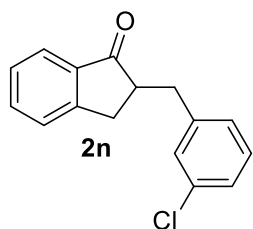

**2-(3-chlorobenzyl)-2,3-dihydro-1H-inden-1-one (2n):** Prepared according to general procedure C from *tert*-butyl (2-allylbenzoyl)(benzyl)carbamate **1a** (35.1 mg, 0.100 mmol) and 3-chlorophenylboronic acid pinacol ester (71.6

mg, 0.300 mmol). The crude reaction mixture was purified by flash column chromatography (100:0 hexanes:EtOAc to 90:10 hexanes:EtOAc) to give **2n** as a colorless oil in 54% yield (13.9 mg, 0.054 mmol). **<sup>1</sup>H NMR** (400 MHz, CDCl<sub>3</sub>) δ 2.65 (dd, *J* = 14.0, 10.4 Hz, 1H), 2.84 (dd, *J* = 17.0, 4.1 Hz, 1H), 2.95-3.01 (m, 1H), 3.20 (dd, *J* = 17.2, 7.7 Hz, 1H), 3.37 (dd, *J* = 14.1, 4.2 Hz, 1H), 7.13 (ddd, *J* = 7.0, 1.7, 1.7 Hz, 1H), 7.18-7.25 (m, 3H), 7.36-7.43 (m, 2H), 7.58 (ddd, *J* = 7.6, 7.6, 1.2 Hz, 1H), 7.78 (d, *J* = 7.7 Hz, 1H). **<sup>13</sup>C NMR** (101 MHz, CDCl<sub>3</sub>) δ 32.3, 36.8, 48.8, 124.2, 126.74, 126.75, 127.2, 127.7, 129.1, 130.0, 134.4, 135.1, 136.6, 141.9, 153.5, 207.4. **HRMS** (ESI): Calcd. for C<sub>16</sub>H<sub>14</sub>ClO<sup>+</sup> ([M+H]<sup>+</sup>): 257.0728, Found: 257.0725.

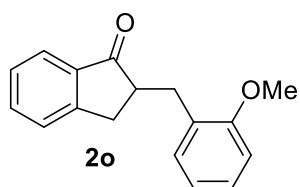

**2-(2-methoxybenzyl)-2,3-dihydro-1H-inden-1-one (2o):** Prepared according to general procedure C from *tert*-butyl (2-allylbenzoyl)(benzyl)carbamate **1a** (35.1 mg, 0.100 mmol) and 2-methoxyphenylboronic acid pinacol ester (70.2 mg, 0.300 mmol). The crude reaction mixture was purified by flash column chromatography (100:0 hexanes:EtOAc to 90:10 hexanes:EtOAc) to give **2o** as a colorless oil in 50% yield (12.6 mg, 0.050 mmol). **<sup>1</sup>H NMR** (400 MHz, CDCl<sub>3</sub>) δ 2.63 (dd, *J* = 13.6, 9.9 Hz, 1H), 2.86 (dd, *J* = 20.5, 7.2 Hz, 1H), 3.07-3.16 (m, 2H), 3.42 (dd, *J* = 13.6, 4.2 Hz, 1H), 3.82 (s, 3H), 6.86-6.92 (m, 2H), 7.17-7.24 (m, 2H), 7.34-7.40 (m, 2H), 7.56 (ddd, *J* = 7.6, 7.6, 1.2 Hz, 1H), 7.78 (d, *J* = 7.9 Hz, 1H). **<sup>13</sup>C NMR** (101 MHz, CDCl<sub>3</sub>) δ 31.9, 32.5, 47.7, 55.3, 110.4, 120.6, 124.1, 126.7, 127.4, 127.8, 128.3, 130.6, 134.7, 136.9, 154.0, 157.9, 208.5. **HRMS** (ESI): Calcd. for C<sub>17</sub>H<sub>17</sub>O<sub>2</sub><sup>+</sup> ([M+H]<sup>+</sup>): 253.1223, Found: 253.1221.

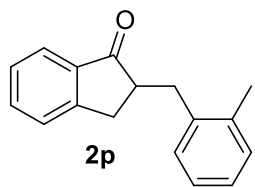

**2-(2-methylbenzyl)-2,3-dihydro-1H-inden-1-one (2p):** Prepared according to general procedure C from *tert*-butyl (2-allylbenzoyl)(benzyl)carbamate **1a** (35.1 mg, 0.100 mmol) and 2-

tolylboronic acid pinacol ester (65.4 mg, 0.300 mmol). The crude reaction mixture was purified by flash column chromatography (100:0 hexanes:EtOAc to 90:10 hexanes:EtOAc) to give **2p** as a colorless oil in 90% yield (21.3 mg, 0.090 mmol). **<sup>1</sup>H NMR** (400 MHz, CDCl<sub>3</sub>) δ 2.38 (s, 3H), 2.59 (dd, *J* = 14.5, 11.1 Hz, 1H), 2.87 (dd, *J* = 17.2, 4.0 Hz, 1H), 2.99-3.06 (m, 1H), 3.21 (dd, *J* = 17.2, 7.8 Hz, 1H), 3.49 (dd, *J* = 14.5, 4.1 Hz, 1H), 7.14-7.21 (m, 4H), 7.37-7.44 (m, 2 H), 7.59 (ddd, *J* = 7.6, 7.6, 1.1 Hz, 1H) 7.81 (d, *J* = 7.6 Hz, 1H). **<sup>13</sup>C NMR** (101 MHz, CDCl<sub>3</sub>) δ 19.6, 32.8, 34.6, 47.7, 124.1, 124.3, 126.1, 126.6, 126.8, 127.5, 129.1, 130.6, 135.0, 136.6, 138.1, 153.7, 208.1. **HRMS** (ESI): Calcd. for C<sub>17</sub>H<sub>17</sub>O<sup>+</sup> ([M+H]<sup>+</sup>): 237.1274, Found: 237.1273.

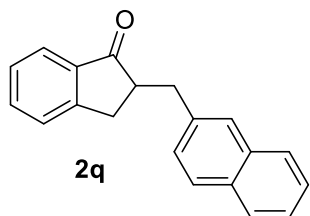

**2-(naphthalen-2-ylmethyl)-2,3-dihydro-1H-inden-1-one (2q):**

Prepared according to general procedure C from *tert*-butyl (2-allylbenzoyl)(benzyl)carbamate **1a** (35.1 mg, 0.100 mmol) and 2-naphthylboronic acid pinacol ester (76.2 mg, 0.300 mmol). The crude reaction mixture was purified by flash column chromatography (100:0 DCM:EtOAc to 90:10 DCM:EtOAc) to give **2q** as a white solid in 99% (27.0 mg, 0.099 mmol). **<sup>1</sup>H NMR** (400 MHz, CDCl<sub>3</sub>) δ 2.84 (dd, *J* = 14.1, 10.0 Hz, 1H), 2.92 (dd, *J* = 16.5, 3.2 Hz, 1H), 3.06-3.23 (m, 2H), 3.57 (dd, *J* = 14.1, 4.1 Hz, 1H), 7.34-7.50 (m, 5H), 7.57 (dt, *J* = 7.7, 1.2 Hz, 1H), 7.68 (broad s, 1H), 7.76-7.84 (m, 4H). **<sup>13</sup>C NMR** (101 MHz, CDCl<sub>3</sub>) δ 32.3, 37.3, 49.0, 124.2, 125.6, 126.2, 126.7, 127.4, 127.5, 127.6, 127.61, 127.8, 128.4, 132.3, 133.7, 135.0, 136.7, 137.3, 153.8, 208.0. **HRMS** (ESI): Calcd. for C<sub>20</sub>H<sub>16</sub>O<sup>+</sup>Na ([M+Na]<sup>+</sup>): 295.1093, Found: 295.1057.

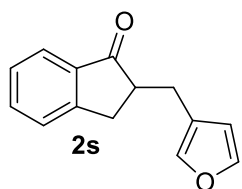

**2-(furan-3-ylmethyl)-2,3-dihydro-1H-inden-1-one (2s):**

Prepared according to general procedure C from *tert*-butyl (2-allylbenzoyl)(benzyl)carbamate **1a** (35.1 mg, 0.100 mmol) and 3-furanylboronic acid pinacol ester (58.2 mg, 0.300 mmol). The crude reaction mixture was purified

by flash column chromatography (100:0 hexanes:EtOAc to 90:10 hexanes:EtOAc) to give **2s** as a colorless oil in 63% yield (13.4 mg, 0.063 mmol). **<sup>1</sup>H NMR** (400 MHz, CDCl<sub>3</sub>) δ 2.67 (dd, *J* = 14.2, 8.8 Hz, 1H), 2.89 (dd, *J* = 16.6, 4.2 Hz, 1H), 2.87-2.95 (m, 2H), 3.08 (dd, *J* = 14.2, 3.7 Hz, 1H), 3.26 (dd, *J* = 16.6, 7.2 Hz, 1H), 6.27 (s, 1H), 7.32 (t, *J* = 1.6 Hz, 1H), 7.36 (t, *J* = 7.8 Hz, 1H), 7.42 (d, *J* = 7.7 Hz, 1H), 7.57 (td, *J* = 7.6, 1.2 Hz, 1H), 7.76 (d, *J* = 8.0 Hz, 1H). **<sup>13</sup>C NMR** (101 MHz, CDCl<sub>3</sub>) δ 26.2, 32.4, 47.8, 111.3, 122.3, 124.1, 126.7, 127.6, 135.0, 136.8, 139.8, 143.1, 153.8, 208.0. **HRMS** (ESI): Calcd. for C<sub>14</sub>H<sub>13</sub>O<sub>2</sub><sup>+</sup> ([M+H]<sup>+</sup>): 213.0910, Found: 213.0916.

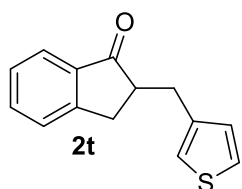

**2-(thiophen-3-ylmethyl)-2,3-dihydro-1H-inden-1-one (2t):** Prepared according to general procedure C from *tert*-butyl (2-allylbenzoyl)(benzyl)carbamate **1a** (35.1 mg, 0.100 mmol) and 3-

thienylboronic acid pinacol ester (63.0 mg, 0.300 mmol). The crude reaction mixture was purified by flash column chromatography (100:0 hexanes:EtOAc to 90:10 hexanes:EtOAc) to give **2t** as a white solid in 88% yield (20.1 g, 0.088 mmol). **<sup>1</sup>H NMR** (400 MHz, CDCl<sub>3</sub>) δ 2.82 (dd, *J* = 14.4, 9.8 Hz, 1H), 2.88 (dd, *J* = 17.2, 4.0 Hz, 1H), 2.96-3.02 (m, 1H), 3.25 (dd, *J* = 17.2, 7.7 Hz, 1H), 3.33 (dd, *J* = 14.4, 4.1 Hz, 1H), 6.98 (dd, *J* = 4.9, 1.2 Hz, 1H), 7.00-7.02 (m, 1H), 7.25 (dd, *J* = 4.9, 3.0 Hz, 1H), 7.37 (t, *J* = 7.8 Hz, 1H), 7.41 (d, *J* = 7.7 Hz, 1H), 7.57 (td, *J* = 7.6, 1.2 Hz, 1H), 7.77 (d, *J* = 7.7 Hz, 1H). **<sup>13</sup>C NMR** (101 MHz, CDCl<sub>3</sub>) δ 31.5, 32.5, 48.3, 121.5, 124.1, 125.8, 126.7, 127.5, 128.4, 134.9, 136.7, 139.8, 153.8, 207.9. **HRMS** (ESI): Calcd. for C<sub>14</sub>H<sub>13</sub>OS<sup>+</sup> ([M+H]<sup>+</sup>): 229.0682, Found: 222.0684.

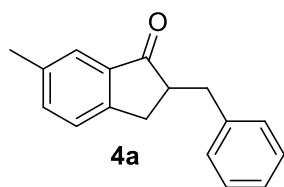

**2-benzyl-6-methyl-2,3-dihydro-1H-inden-1-one (4a):** Prepared according to general procedure C from *tert*-butyl (2-allyl-5-methyl)(benzyl)carbamate **3a** (36.5 mg, 0.100 mmol) and phenylboronic

acid pinacol ester (61.2 mg, 0.300 mmol). The crude reaction mixture was purified by flash

column chromatography (100:0 hexanes:EtOAc to 90:10 hexanes:EtOAc) to give **4a** as a colorless oil in 92% yield (21.7 mg, 0.092 mmol). **<sup>1</sup>H NMR** (400 MHz, CDCl<sub>3</sub>) δ 2.41 (s, 3H), 2.66 (dd, *J* = 14.0, 10.4 Hz, 1H), 2.81 (dd, *J* = 17.0, 3.8 Hz, 1H), 2.97-3.04 (m, 1H), 3.13 (dd, *J* = 17.0, 7.8 Hz, 1H), 3.40 (dd, *J* = 14.0, 4.2 Hz, 1H), 7.21-7.36 (m, 6H), 7.40 (dd, *J* = 7.8, 1.1 Hz, 1H), 7.59 (s, 1H). **<sup>13</sup>C NMR** (101 MHz, CDCl<sub>3</sub>) δ 21.2, 32.0, 37.2, 49.4, 124.1, 126.4, 126.4, 128.6, 129.0, 136.2, 136.8, 137.5, 139.9, 151.1, 208.1. **HRMS** (ESI): Calcd. for C<sub>17</sub>H<sub>17</sub>O<sup>+</sup> ([M+H]<sup>+</sup>): 237.1274, Found: 237.1270.

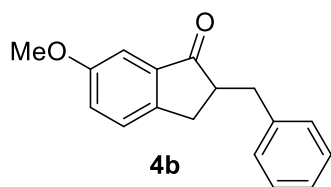

**2-benzyl-6-methoxy-2,3-dihydro-1H-inden-1-one (4b):** Prepared according to a modified version of general procedure C from *tert*-butyl (2-allyl-5-methoxy)(benzyl)carbamate **3b** (38.1 mg, 0.100 mmol) and

phenylboronic acid pinacol ester (61.2 mg, 0.300 mmol). Upon completion of the reaction, the reaction mixture was filtered through a short plug of silica gel. The filtrate was concentrated under reduced pressure. To the crude product was dissolved in DCM (2.0 mL). The resulting solution was cooled to 0 °C, and TFA (0.400 mL) was added slowly. The mixture was allowed to warm to room temperature and stirred for 1 h. The reaction was concentrated under reduced pressure. The crude reaction mixture was purified by flash column chromatography (100:0 hexanes:EtOAc to 90:10 hexanes:EtOAc) to give **4b** as a white solid in 96% yield (24.0 mg, 0.096 mmol). **<sup>1</sup>H NMR** (400 MHz, CDCl<sub>3</sub>) δ 2.66 (dd, *J* = 14.0, 10.2 Hz, 1H), 2.78 (dd, *J* = 16.4, 3.2 Hz, 1H), 2.97-3.07 (m, 1H), 3.09 (dd, *J* = 16.4, 7.6 Hz, 1H), 3.39 (dd, *J* = 14.0, 4.2 Hz, 1H), 3.84 (s, 3H), 7.17 (dd, *J* = 8.3, 2.5 Hz, 1H), 7.19-7.33 (m, 6H) **<sup>13</sup>C NMR** (101 MHz, CDCl<sub>3</sub>) δ 31.6, 37.2, 49.8, 55.7, 105.2, 124.4, 126.5, 127.4, 128.6, 129.0, 137.8, 139.8, 146.6, 159.5, 208.0 **HRMS** (ESI): Calcd. for C<sub>17</sub>H<sub>17</sub>O<sub>2</sub><sup>+</sup> ([M+H]<sup>+</sup>): 253.1223, Found: 253.1226.

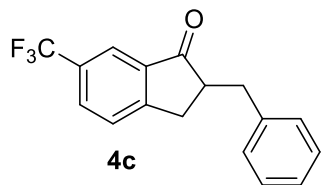

**2-benzyl-6-(trifluoromethyl)-2,3-dihydro-1H-inden-1-one (4c):**

Prepared according to general procedure C from *tert*-butyl (2-allyl-5-(trifluoromethyl)benzoyl)(benzyl)carbamate **3c** (41.9 mg, 0.100 mmol) and phenylboronic acid pinacol ester (61.2 mg, 0.300 mmol). The crude reaction mixture was purified by flash column chromatography (100:0 hexanes:EtOAc to 90:10 hexanes:EtOAc) to give **4c** as a white solid in 51% yield (14.8 mg, 0.051 mmol). <sup>1</sup>H NMR (400 MHz, CDCl<sub>3</sub>) δ 2.73 (dd, *J* = 14.0, 10.1 Hz, 1H), 2.93 (dd, *J* = 17.6, 4.0 Hz, 1H), 3.05-3.12 (m, 1H), 3.24 (dd, *J* = 17.6, 7.9 Hz, 1H), 3.40 (dd, *J* = 14.0, 4.4 Hz, 1H), 7.21-7.25 (m, 3H), 7.28-7.34 (m, 2H), 7.52 (d, *J* = 8.0 Hz, 1H), 7.81 (dd, *J* = 8.0, 1.3 Hz, 1H), 8.04 (s, 1H). <sup>13</sup>C NMR (101 MHz, CDCl<sub>3</sub>) δ 32.3, 36.9, 49.4, 121.4 (q, *J* = 4.0 Hz, 1H), 126.6 (q, *J* = 274 Hz, 1C), 126.7, 127.5, 128.8, 129.0, 130.5 (q, *J* = 33.3 Hz, 1C), 131.4 (q, *J* = 3.0 Hz, 1C), 137.1, 139.2, 156.9, 206.6. <sup>19</sup>F NMR (CDCl<sub>3</sub>, 376 MHz): δ -62.5 (s, 1F). HRMS (ESI): Calcd. for C<sub>17</sub>H<sub>14</sub>F<sub>3</sub>O<sup>+</sup> ([M+H]<sup>+</sup>): 291.0991, Found: 291.0995.

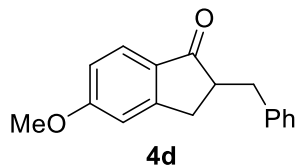

**2-benzyl-5-methoxy-2,3-dihydro-1H-inden-1-one (4d):**

Prepared according to general procedure C from *tert*-butyl (2-allylbenzoyl)(benzyl)carbamate **3d** (38.1 mg, 0.100 mmol) and phenylboronic acid pinacol ester (61.2 mg, 0.300 mmol). The crude reaction mixture was purified by flash column chromatography (100:0 hexanes:EtOAc to 90:10 hexanes:EtOAc) to give **4d** as a white solid in 88% yield (22.2 mg, 0.088 mmol). <sup>1</sup>H NMR (400 MHz, CDCl<sub>3</sub>) δ 2.65 (dd, *J* = 14.0, 10.4 Hz, 1H), 2.80 (dd, *J* = 17.2, 3.8 Hz, 1H), 2.96-3.02 (m, 1H), 3.11 (dd, *J* = 17.2, 7.8 Hz, 1H), 3.39 (dd, *J* = 14.0, 4.2 Hz, 1H), 3.86 (s, 3H), 6.82 (s, 1H), 6.90 (dd, *J* = 8.5, 2.2 Hz, 1H), 7.19-7.32 (m, 5H), 7.72 (d, *J* = 8.5 Hz, 1H). <sup>13</sup>C NMR (101 MHz, CDCl<sub>3</sub>) δ 32.3, 37.3, 49.2, 55.7, 109.8,



115.5, 125.8, 126.4, 128.6, 129.0, 129.9, 139.9, 156.7, 165.5, 206.1. **HRMS** (ESI): Calcd. for  $C_{17}H_{17}O_2^+$  ( $[M+H]^+$ ): 253.1223, Found: 253.1226.

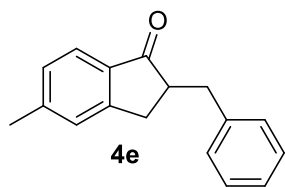

**2-benzyl-5-methyl-2,3-dihydro-1H-inden-1-one (4e):** Prepared

according to general procedure C from *tert*-butyl (2-allyl-4-methylbenzoyl)(benzyl)carbamate **3e** (36.5 mg, 0.100 mmol) and phenylboronic acid pinacol ester (61.2 mg, 0.300 mmol). The crude reaction mixture was purified by flash column chromatography (100:0 hexanes:EtOAc to 90:10 hexanes:EtOAc) to give **4e** as a colorless oil in 97% yield (22.9 mg, 0.097 mmol). **<sup>1</sup>H NMR** (400 MHz,  $CDCl_3$ )  $\delta$  2.42 (s, 3H), 2.65 (dd,  $J = 14.0, 10.5$  Hz, 1H), 2.81 (dd,  $J = 17.1, 3.7$  Hz, 1H), 2.95-3.02 (m, 1H), 3.11 (dd,  $J = 17.1, 7.7$  Hz, 1H), 3.39 (dd,  $J = 13.9, 4.1$  Hz, 1H), 7.17-7.32 (m, 7H), 7.68 (d,  $J = 7.8$  Hz, 1H). **<sup>13</sup>C NMR** (101 MHz,  $CDCl_3$ )  $\delta$  22.2, 32.1, 37.3, 49.2, 123.9, 126.4, 127.0, 128.6, 128.8, 129.1, 134.4, 139.9, 146.1, 154.3, 207.4. **HRMS** (ESI): Calcd. for  $C_{17}H_{17}O^+$  ( $[M+H]^+$ ): 237.1274, Found: 237.1276.

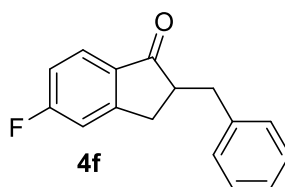

**2-benzyl-5-fluoro-2,3-dihydro-1H-inden-1-one (4f):** Prepared

according to general procedure C from *tert*-butyl (2-allyl-4-fluorobenzoyl)(benzyl)carbamate **3f** (36.9 mg, 0.100 mmol) and phenylboronic acid pinacol ester (61.2 mg, 0.300 mmol). The crude reaction mixture was purified by flash column chromatography (100:0 hexanes:EtOAc to 90:10 hexanes:EtOAc) to give **4f** as a yellow oil in 99% yield (23.8 mg, 0.099 mmol). **<sup>1</sup>H NMR** (400 MHz,  $CDCl_3$ )  $\delta$  2.69 (dd,  $J = 14.0, 10.2$  Hz, 1H), 2.85 (dd,  $J = 17.3, 3.8$  Hz, 1H), 2.98-3.07 (m, 1H), 3.15 (dd,  $J = 17.3, 7.8$  Hz, 1H), 3.38 (dd,  $J = 14.0, 4.3$  Hz, 1H), 7.02-7.95 (m, 2H), 7.19-7.25 (m, 3H), 7.27-7.33 (m, 2H), 7.78 (dd,  $J = 8.2, 5.3$  Hz, 1H). **<sup>13</sup>C NMR** (101 MHz,  $CDCl_3$ )  $\delta$  32.2 (d,  $J = 2.0$  Hz, 1C), 37.1, 49.3,

113.3 (d,  $J = 22.2$  Hz, 1C), 115.9 (d,  $J = 24.2$  Hz, 1C), 126.4 (d,  $J = 11.1$  Hz, 1C), 126.6, 128.7, 129.0, 133.1 (d,  $J = 2.0$  Hz, 1C), 139.4, 156.6 (d,  $J = 10.1$  Hz, 1C), 167.3 (d,  $J = 257.6$  Hz, 1C), 206.0.  **$^{19}\text{F}$  NMR** ( $\text{CDCl}_3$ , 376 MHz):  $\delta$  -102.7 (m, 1F). **HRMS** (ESI): Calcd. for  $\text{C}_{16}\text{H}_{14}\text{FO}^+$  ( $[\text{M}+\text{H}]^+$ ): 241.1023, Found: 241.1027.

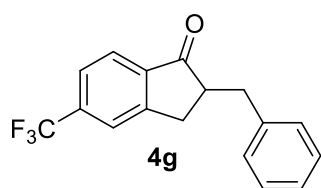

**2-benzyl-5-(trifluoromethyl)-2,3-dihydro-1H-inden-1-one (4g):**

Prepared according to general procedure C from *tert*-butyl(2-allyl-4-(trifluoromethyl)(benzyl)carbamate **3g** (41.9 mg, 0.100 mmol) and phenylboronic acid pinacol ester (61.2 mg, 0.300 mmol). The crude reaction mixture was purified by flash column chromatography (100:0 hexanes:EtOAc to 90:10 hexanes:EtOAc) to give **4g** as a white solid in 85% yield (24.7 mg, 0.085 mmol).  **$^1\text{H}$  NMR** (400 MHz,  $\text{CDCl}_3$ )  $\delta$  2.73 (dd,  $J = 14.0$ , 10.1 Hz, 1H), 2.93 (dd,  $J = 17.4$ , 4.0 Hz, 1H), 3.03-3.11 (m, 1H), 3.24 (dd,  $J = 17.4$ , 7.8 Hz, 1H), 3.39 (dd,  $J = 14.0$ , 4.4 Hz, 1H), 7.20-7.25 (m, 3H), 7.28-7.34 (m, 2H), 7.63 (d,  $J = 8.0$  Hz, 1H), 7.67 (s, 1H), 7.88 (d,  $J = 8.0$  Hz, 1H)  **$^{13}\text{C}$  NMR** (101 MHz,  $\text{CDCl}_3$ )  $\delta$  32.2, 36.9, 49.4, 123.9 (q,  $J = 4.0$  Hz, 1C), 124.7, 125.2 (q,  $J = 4.0$  Hz, 1C), 126.5 (q,  $J = 274.7$  Hz, 1C), 126.7, 128.8, 129.0, 136.2 (q,  $J = 31.3$  Hz, 1C), 139.2, 139.31-139.35 (m, 1C), 153.8, 206.9.  **$^{19}\text{F}$  NMR** ( $\text{CDCl}_3$ , 376 MHz):  $\delta$  -62.9 (s, 3F). **HRMS** (ESI): Calcd. for  $\text{C}_{17}\text{H}_{14}\text{F}_3\text{O}^+$  ( $[\text{M}+\text{H}]^+$ ): 291.0991, Found: 291.0978.

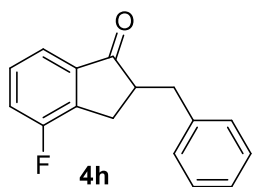

**2-benzyl-4-fluoro-2,3-dihydro-1H-inden-1-one (4h):**

Prepared according to general procedure C from *tert*-butyl(2-allyl-3-fluorobenzoyl)(benzyl)carbamate **3h** (36.9 mg, 0.100 mmol) and phenylboronic acid pinacol ester (61.2 mg, 0.300 mmol). The crude reaction mixture was purified by flash column chromatography (100:0 hexanes:EtOAc to 90:10 hexanes:EtOAc) to give **4h** as a

yellow oil in 95% yield (22.8 mg, 0.095 mmol). **<sup>1</sup>H NMR** (400 MHz, CDCl<sub>3</sub>) δ 2.71 (dd, *J* = 14.0, 10.2 Hz, 1H), 2.85 (dd, *J* = 17.5, 4.0 Hz, 1H), 3.00-3.06 (m, 1H), 3.20 (dd, *J* = 17.5, 7.8 Hz, 1H), 3.39 (dd, *J* = 14.0, 4.3 Hz, 1H), 7.21-7.27 (m, 4H), 7.29-7.33 (m, 2H), 7.34-7.39 (m, 1H), 7.58 (d, *J* = 7.5 Hz, 1H). **<sup>13</sup>C NMR** (101 MHz, CDCl<sub>3</sub>) δ 28.0, 37.0, 49.0, 119.9, 121.0 (d, *J* = 20.2 Hz, 1C), 126.6, 128.7, 129.0, 129.5 (d, *J* = 6.1 Hz, 1C), 139.3, 139.5 (d, *J* = 8.1 Hz, 1C), 139.6 (d, *J* = 8.1 Hz, 1C), 160.2 (d, *J* = 251.5 Hz, 1C), 206.6. **<sup>19</sup>F NMR** (376 MHz, CDCl<sub>3</sub>) δ -118.9 (m, 1F). **HRMS** (ESI): Calcd. for C<sub>16</sub>H<sub>14</sub>FO<sup>+</sup> ([M+H]<sup>+</sup>): 241.1023, Found: 241.1019.

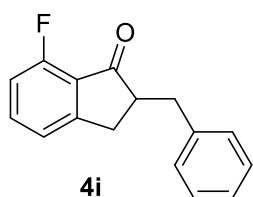

**2-benzyl-4-fluoro-2,3-dihydro-1H-inden-1-one (4i):** Prepared according to general procedure C from *tert*-butyl(2-allyl-6-fluorobenzoyl)(benzyl)carbamate **3i** (36.9 mg, 0.100 mmol) and

phenylboronic acid pinacol ester (61.2 mg, 0.300 mmol). The crude reaction mixture was purified by flash column chromatography (100:0 hexanes:EtOAc to 90:10 hexanes:EtOAc) to give **4i** as a yellow oil in 84% yield (20.2 mg, 0.084 mmol). **<sup>1</sup>H NMR** (400 MHz, CDCl<sub>3</sub>) δ 2.70 (dd, *J* = 14.0, 10.2 Hz, 1H), 2.87 (dd, *J* = 17.3, 4.2 Hz, 1H), 3.00-3.06 (m, 1H), 3.17 (dd, *J* = 17.3, 7.9 Hz, 1H), 3.39 (dd, *J* = 14.0, 4.3 Hz, 1H), 6.97 (t, *J* = 9.0 Hz, 1H), 7.16 (d, *J* = 7.3 Hz, 1H), 7.19-7.33 (m, 5H), 7.54 (m, 1H). **<sup>13</sup>C NMR** (101 MHz, CDCl<sub>3</sub>) δ 32.2, 37.0, 49.6, 114.4 (d, *J* = 19.2 Hz, 1C), 122.5 (d, *J* = 5.1 Hz, 1C), 124.5 (d, *J* = 13.1 Hz, 1C), 126.6, 128.7, 129.1, 136.7-136.9 (m, 1C), 139.4, 155.8 (d, *J* = 2.0 Hz, 1C), 159.2 (d, *J* = 265.6 Hz, 1C), 204.1 (d, *J* = 1.0 Hz, 1C). **<sup>19</sup>F NMR** (376 MHz, CDCl<sub>3</sub>) δ -114.4 (m, 1F). **HRMS** (ESI): Calcd. for C<sub>16</sub>H<sub>14</sub>FO<sup>+</sup> ([M+H]<sup>+</sup>): 241.1023, Found: 241.1018.

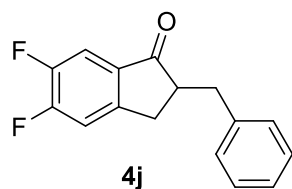

**2-benzyl-5,6-difluoro-2,3-dihydro-1H-inden-1-one (4j):** Prepared according to general procedure C from *tert*-butyl(2-allyl-4,5-difluorobenzoyl)(benzyl)carbamate **3j** (38.7 mg, 0.100 mmol) and phenylboronic acid pinacol ester (61.2 mg, 0.300 mmol). The crude reaction mixture was purified by flash column chromatography (100:0 hexanes:EtOAc to 90:10 hexanes:EtOAc) to give **4j** as a off-white solid in 46% yield (11.9 mg, 0.046 mmol). <sup>1</sup>H NMR (400 MHz, CDCl<sub>3</sub>) δ 2.70 (dd, *J* = 14.0, 10.0 Hz, 1H), 2.82 (dd, *J* = 17.0, 1.2 Hz, 1H), 2.99-3.08 (m, 1H), 3.13 (ddd, *J* = 17.0, 7.7, 0.6 Hz, 1H), 3.36 (dd, *J* = 14.0, 4.3 Hz, 1H), 7.17 (dd, *J* = 9.4, 6.7 Hz, 1H), 7.20-7.24 (m, 3H), 7.27-7.33 (m, 2H), 7.54 (dd, *J* = 8.2, 0.4 Hz, 1H). <sup>13</sup>C NMR (101 MHz, CDCl<sub>3</sub>) δ 31.8 (d, *J* = 1.0 Hz, 1C), 40.0, 49.4 (d, *J* = 1.0 Hz, 1C), 112.2 (dd, *J* = 17.2, 2.0 Hz, 1C), 114.9 (d, *J* = 18.2 Hz, 1C), 126.7, 128.7, 129.0, 133.0 (dd, *J* = 6.1, 3.0 Hz, 1C), 139.1, 150.3 (dd, *J* = 8.1, 3.0 Hz, 1C), 150.8 (dd, *J* = 252.5, 14.1 Hz, 1C), 155.4 (dd, *J* = 260.6, 14.1 Hz, 1C), 205.7 (d, *J* = 2.0 Hz, 1C). <sup>19</sup>F NMR (376 MHz, CDCl<sub>3</sub>) δ -136.8 (m, 1F), -125.2 (m, 1F). HRMS (ESI): Calcd. for C<sub>16</sub>H<sub>13</sub>F<sub>2</sub>O<sup>+</sup> ([M+H]<sup>+</sup>): 259.0929, Found: 259.0918.

### Nickel-Catalyzed Carboacylation of Methyl-2-Allylbenzoate **5**

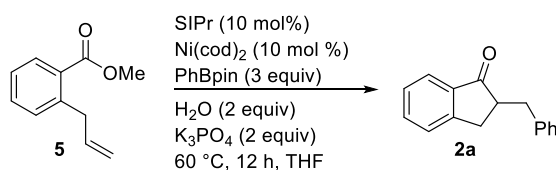

A 1-dram vial was charged with 0.100 mmol of methyl 2-allylbenzoate **5** (17.6 mg, 0.100 mmol), Ni(cod)<sub>2</sub> (2.8 mg, 0.010 mmol), SiPr (3.9 mg, 0.010 mmol), K<sub>3</sub>PO<sub>4</sub> (42.5 mg, 0.200 mmol), H<sub>2</sub>O (3.6 μL, 0.20 mmol), phenylboronic acid pinacol ester (61.2 mg, 0.300 mmol), and THF (0.100 mL). The resulting solution stirred at 60 °C for 12 hours. Upon completion of the reaction, the

reaction mixture was filtered through a plug of silica with 70:30 hexanes:EtOAc. The crude product was purified by column chromatography with a gradient of 100:0 hexanes:EtOAc to 90:10 hexanes:EtOAc over a 25 minute period on a Combiflash system to **2a** as colorless oil in 50% yield (11.0 mg, 0.049 mmol). NMR data match those reported for synthesis of **2a** from benzamide **1a**.

### Enantioselective $\alpha$ -Arylation of **2a** to Form (*S*)-2-Benzyl-2-phenyl-2,3-dihydro-1*H*-inden-1-one **6**

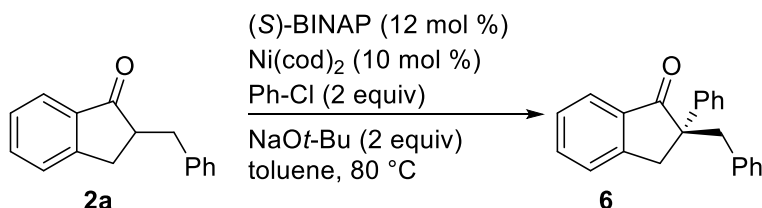

2-Benzyl-2-phenyl-2,3-dihydro-1*H*-inden-1-one **6** was prepared according to a known literature procedure.<sup>3</sup> Inside of a glovebox, to a 1-dram vial containing a magnetic stir bar was added Ni(cod)<sub>2</sub> (5.5 mg, 0.020 mmol), (*S*)-BINAP (14.9 mg, 0.024 mmol), NaOtBu (38.4 mg, 0.400 mmol), chlorobenzene (40.5  $\mu$ L, 0.400 mmol), **2a** (44.5 mg, 0.200 mmol), and toluene (1.00 mL). The vial was sealed with a cap containing a PTFE septum and removed from the glovebox. The reaction was stirred at 80 °C for 36 h. Upon completion, the reaction was cooled to room temperature. The reaction was quenched with a saturated aqueous NH<sub>4</sub>Cl solution and extracted with Et<sub>2</sub>O (2 x 10 mL). The combined organic layers were dried over Na<sub>2</sub>SO<sub>4</sub>, filtered, and concentrated under reduced pressure. The crude product was purified by flash column chromatography (98:2, hexanes:EtOAc) to give **6** as a white solid in 65% yield (39.0 mg, 0.130 mmol). The enantiomeric excess was determined by HPLC analysis (254 nm, 25 °C) *t*<sub>R</sub> 27.2 min (minor); *t*<sub>R</sub> 36.0 min (major) [Chiracel AD-H (0.46 cm x 25 cm)(from Daicel Chemical Ind., Ltd.)

hexane/*i*-PrOH, 98:2, 1.0 mL/min] to be 98% ee. NMR data are consistent with known literature values.<sup>3</sup>

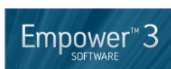

## SAMPLE INFORMATION

Injection Volume: 10.00 ul  
Run Time: 50.0 Minutes

Acq. Method Set: 1\_ADH 98\_2 1mpm  
Channel Name: W2489 ChA  
Proc. Chnl. Descr.: W2489 ChA 254nm

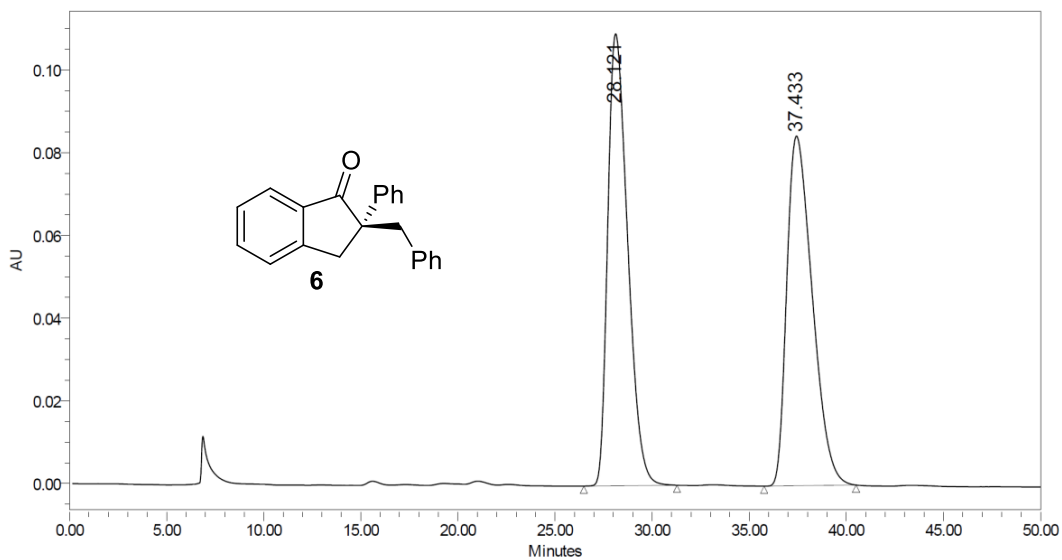

|   | RT     | Area    | % Area | Height | Int Type |
|---|--------|---------|--------|--------|----------|
| 1 | 28.121 | 7785708 | 50.28  | 109316 | bb       |
| 2 | 37.433 | 7700176 | 49.72  | 84584  | bb       |

## SAMPLE INFORMATION

Injection Volume: 10.00 ul  
Run Time: 50.0 Minutes

Acq. Method Set: 1\_ADH 98\_2 1mpm  
Channel Name: W2489 ChA  
Proc. Chnl. Descr.: W2489 ChA 254nm

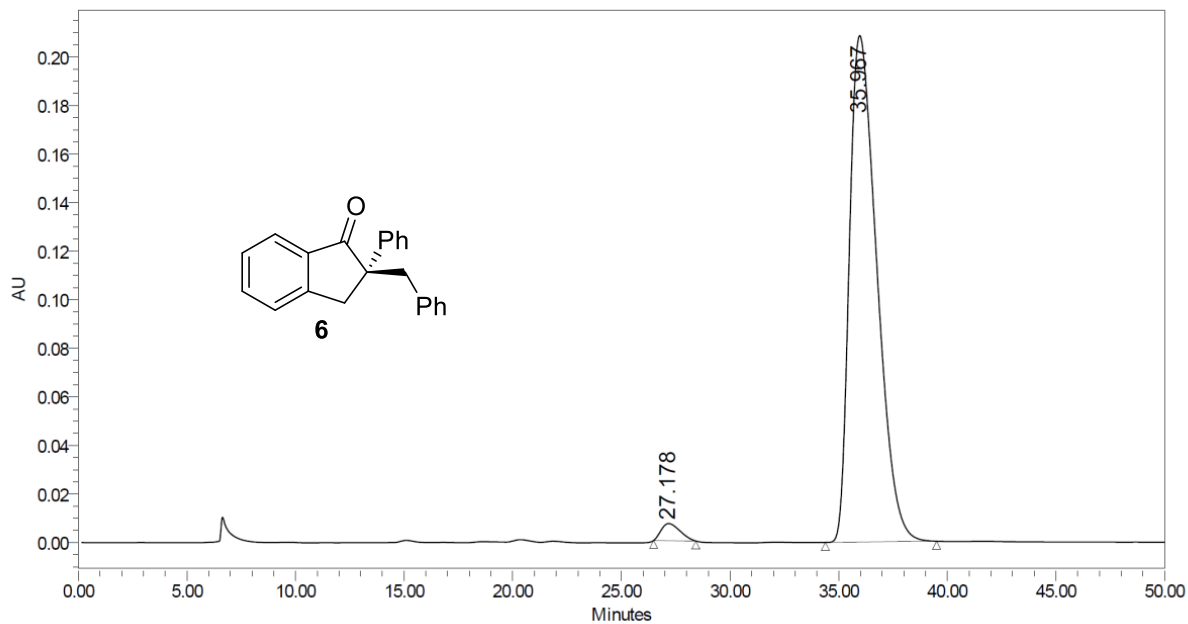

|   | RT     | Area     | % Area | Height | Int Type |
|---|--------|----------|--------|--------|----------|
| 1 | 27.178 | 420907   | 2.25   | 7035   | bb       |
| 2 | 35.967 | 18255606 | 97.75  | 208617 | bb       |

## Experimental Procedures for Competition Experiments:

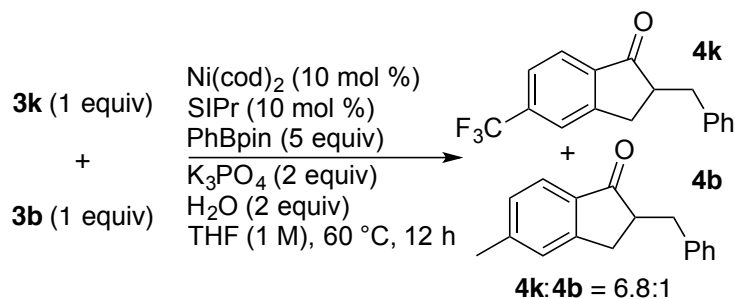

A competition experiment generating 2-benzyl-2,3-dihydro-1*H*-inden-1-ones **4b** and **4k** was carried out by the following procedure. A 1-dram vial was charged with *o*-allylbenzamides **3b** (36.5 mg, 0.100 mmol) and **3k** (41.9 mg, 0.100 mmol),  $\text{Ni(cod)}_2$  (2.8 mg, 0.010 mmol), SIPr (3.9 mg, 0.010 mmol),  $\text{K}_3\text{PO}_4$  (42.4 mg, 0.200 mmol),  $\text{H}_2\text{O}$  (3.6  $\mu\text{L}$ , 0.20 mmol), phenylboronic acid pinacol ester (102 mg, 0.500 mmol), and THF (0.10 mL). The resulting solution was stirred at 60 °C for 12 hours. Upon completion of the reaction, the reaction mixture was filtered through a plug of silica with hexanes:EtOAc (70:30), and concentrated under reduced pressure. The crude mixture was dissolved in  $\text{CDCl}_3$  with  $\text{CH}_2\text{Br}_2$  as internal standard. The ratio of products **4k:4b** was determined to be 6.8:1 by  $^1\text{H}$  NMR spectroscopy. The NMR yields of **4k** and **4b** were determined to be 75% and 11%, respectively.



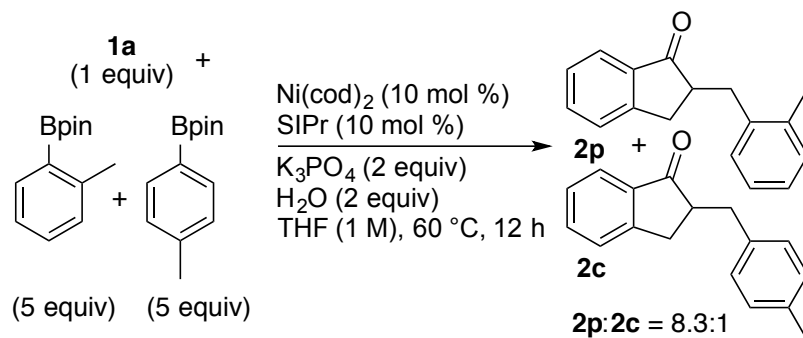

A competition experiment generating 2-benzyl-2,3-dihydro-1*H*-inden-1-ones **2p** and **2c** was carried out by the following procedure. A 1-dram vial was charged with *o*-allylbenzamide **1a** (35.1 mg, 0.100 mmol),  $\text{Ni(cod)}_2$  (2.8 mg, 0.010 mmol), SIPr (3.9 mg, 0.010 mmol),  $\text{K}_3\text{PO}_4$  (42.5 mg, 0.200 mmol),  $\text{H}_2\text{O}$  (3.6  $\mu\text{L}$ , 0.20 mmol), 4-tolylboronic acid pinacol ester (109 mg, 0.500 mmol), 2-tolylboronic acid pinacol ester (109 mg, 0.500 mmol), and THF (0.10 mL). The resulting solution was stirred at 60 °C for 12 hours. Upon completion of the reaction, the reaction mixture was filtered through a plug of silica with hexanes:EtOAc (70:30), and concentrated under reduced pressure. The crude mixture was dissolved in  $\text{CDCl}_3$  with  $\text{CH}_2\text{Br}_2$  as internal standard. The ratio of products **2p:2c** was determined to be 8.3:1 by  $^1\text{H}$  NMR spectroscopy. The NMR yields of **2p** and **2c** were determined to be 58% and 7%, respectively.

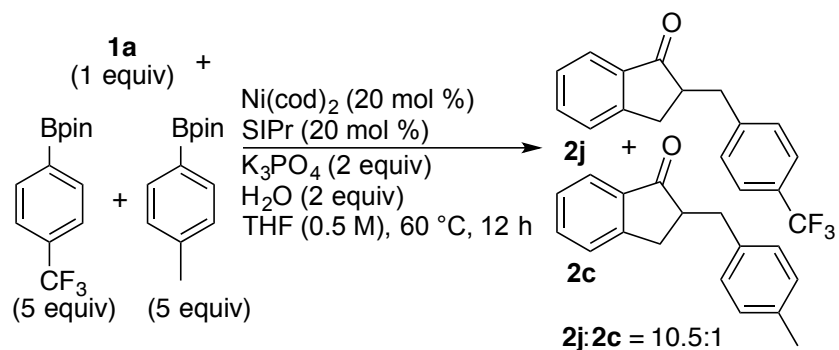

A competition experiment generating 2-benzyl-2,3-dihydro-1*H*-inden-1-ones **2j** and **2c** was carried out by the following procedure. A 1-dram vial was charged with *o*-allylbenzamide **1a** (35.1 mg, 0.100 mmol),  $\text{Ni(cod)}_2$  (2.8 mg, 0.010 mmol), SIPr (3.9 mg, 0.010 mmol),  $\text{K}_3\text{PO}_4$  (42.5 mg, 0.200 mmol),  $\text{H}_2\text{O}$  (3.6  $\mu\text{L}$ , 0.20 mmol), 4-tolylboronic acid pinacol ester (109 mg, 0.500 mmol), 4-(trifluoromethyl)phenylboronic acid pinacol ester (136 mg, 0.500 mmol), and THF (0.10 mL). The resulting solution was stirred at 60 °C for 12 hours. Upon completion of the reaction, the reaction mixture was filtered through a plug of silica with hexanes:EtOAc (70:30), and concentrated under reduced pressure. The crude mixture was dissolved in  $\text{CDCl}_3$  with  $\text{CH}_2\text{Br}_2$  as internal standard. The ratio of products **2j:2c** was determined to be 10.5:1 by  $^1\text{H}$  NMR spectroscopy. The NMR yields of **2j** and **2c** were determined to be 84% and 8%, respectively.

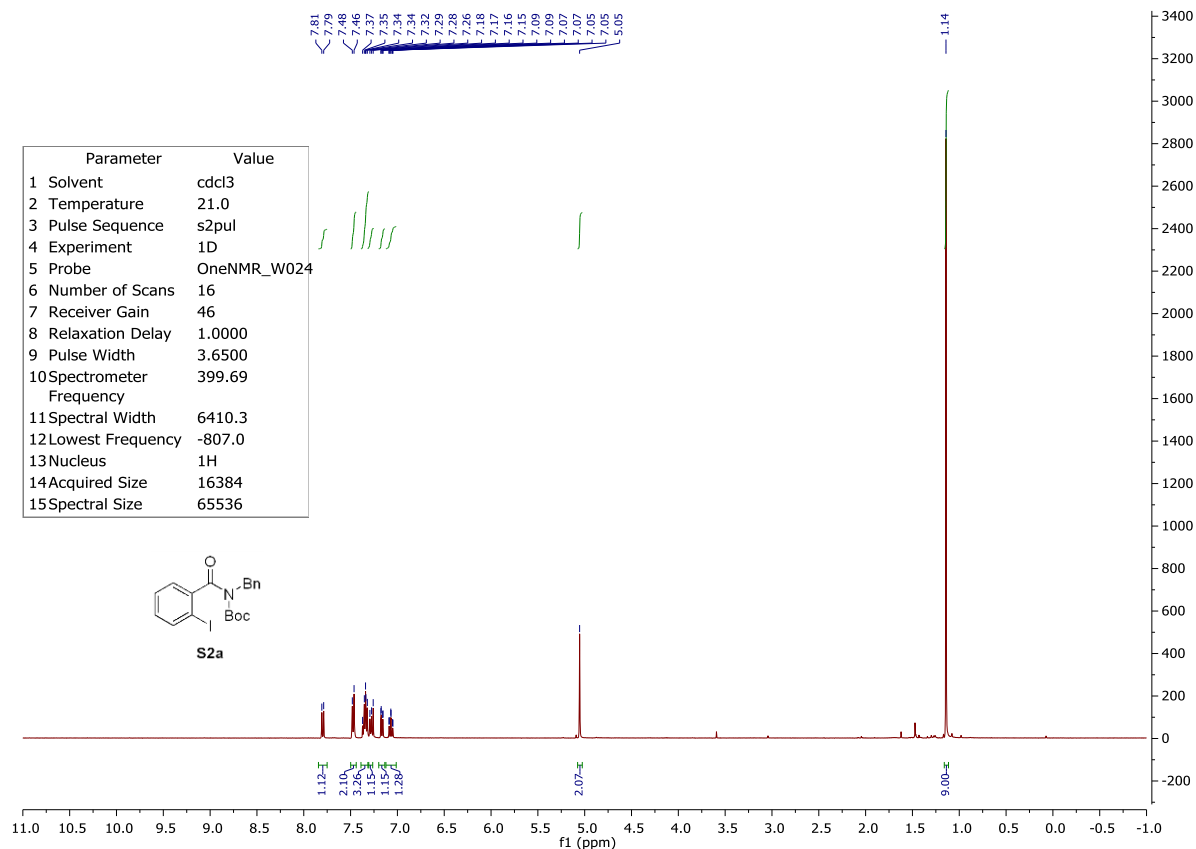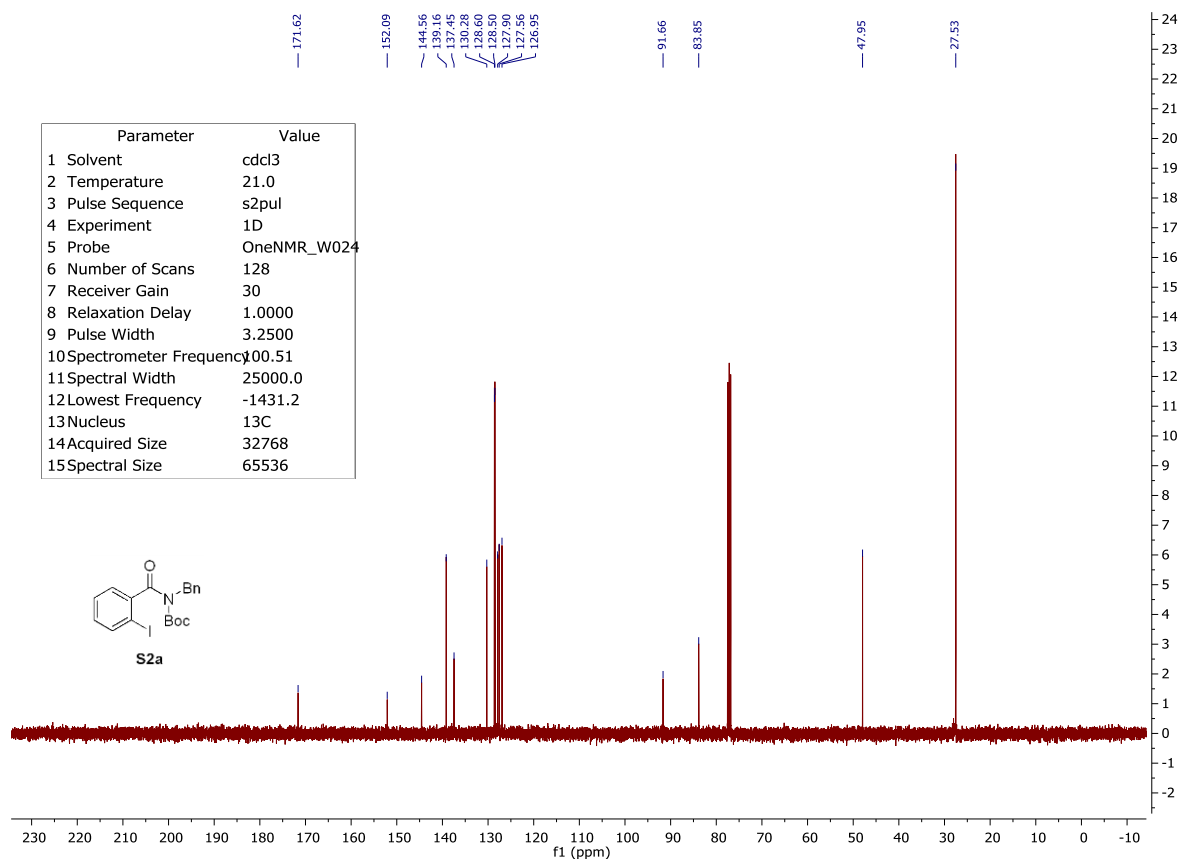

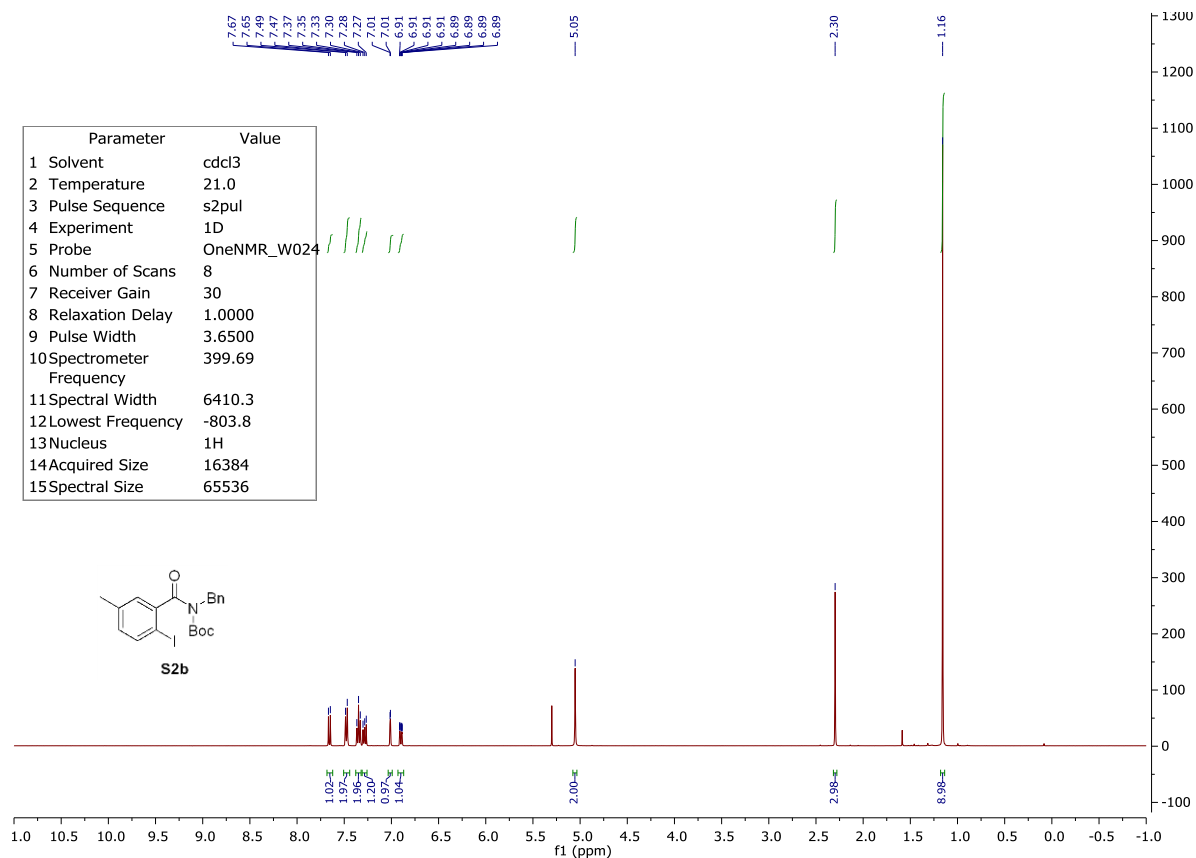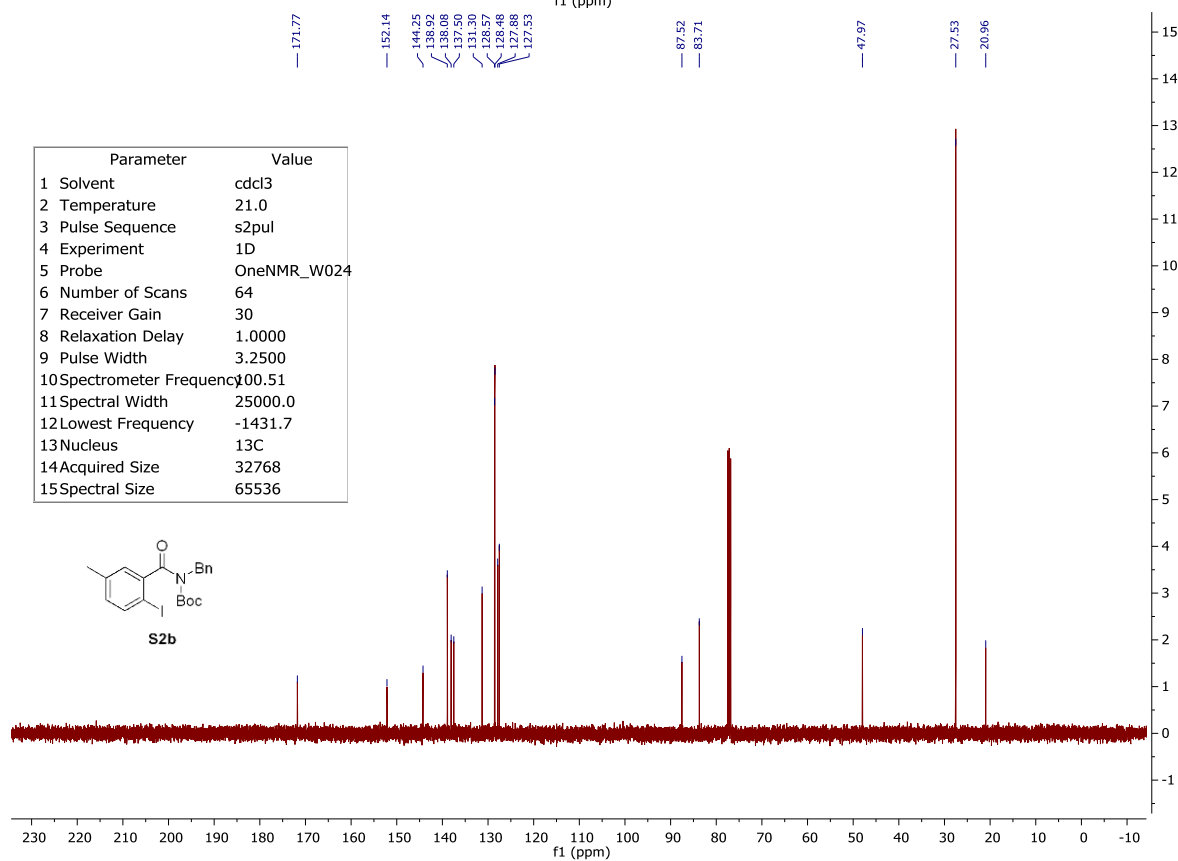

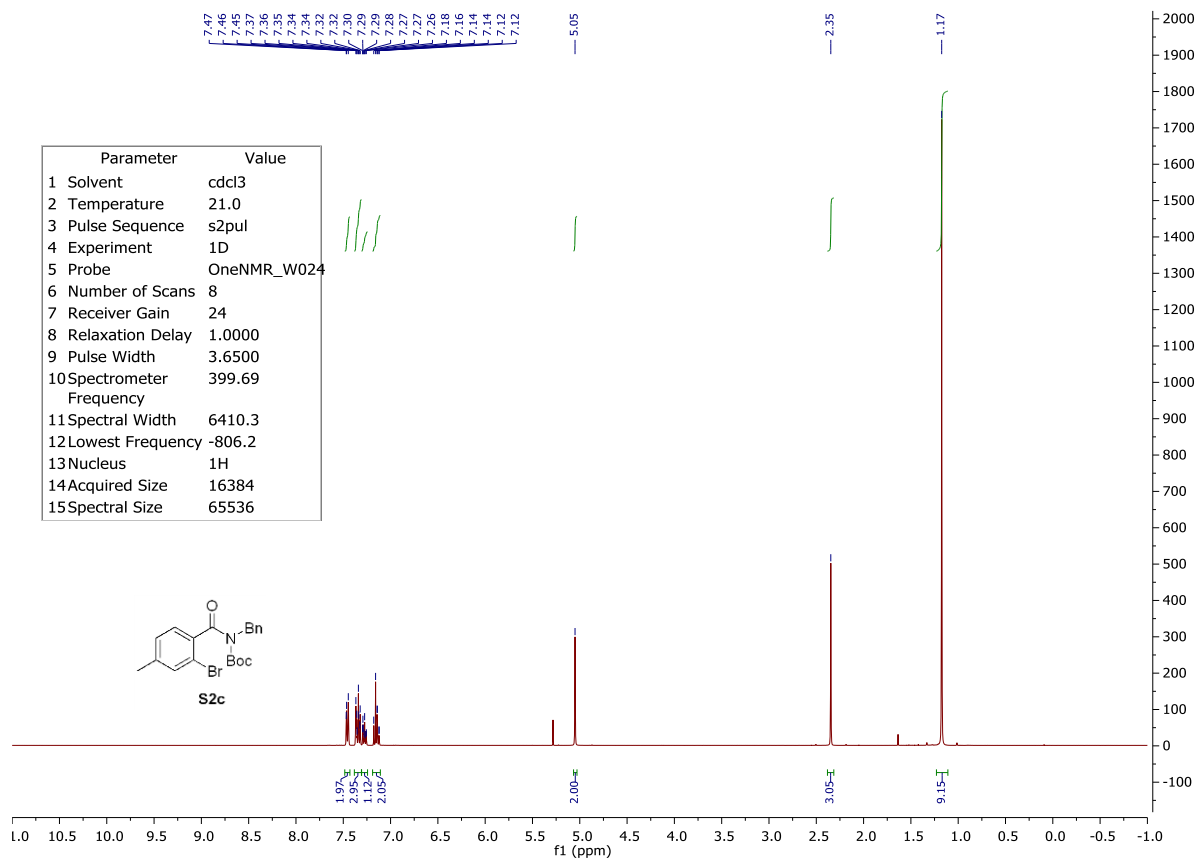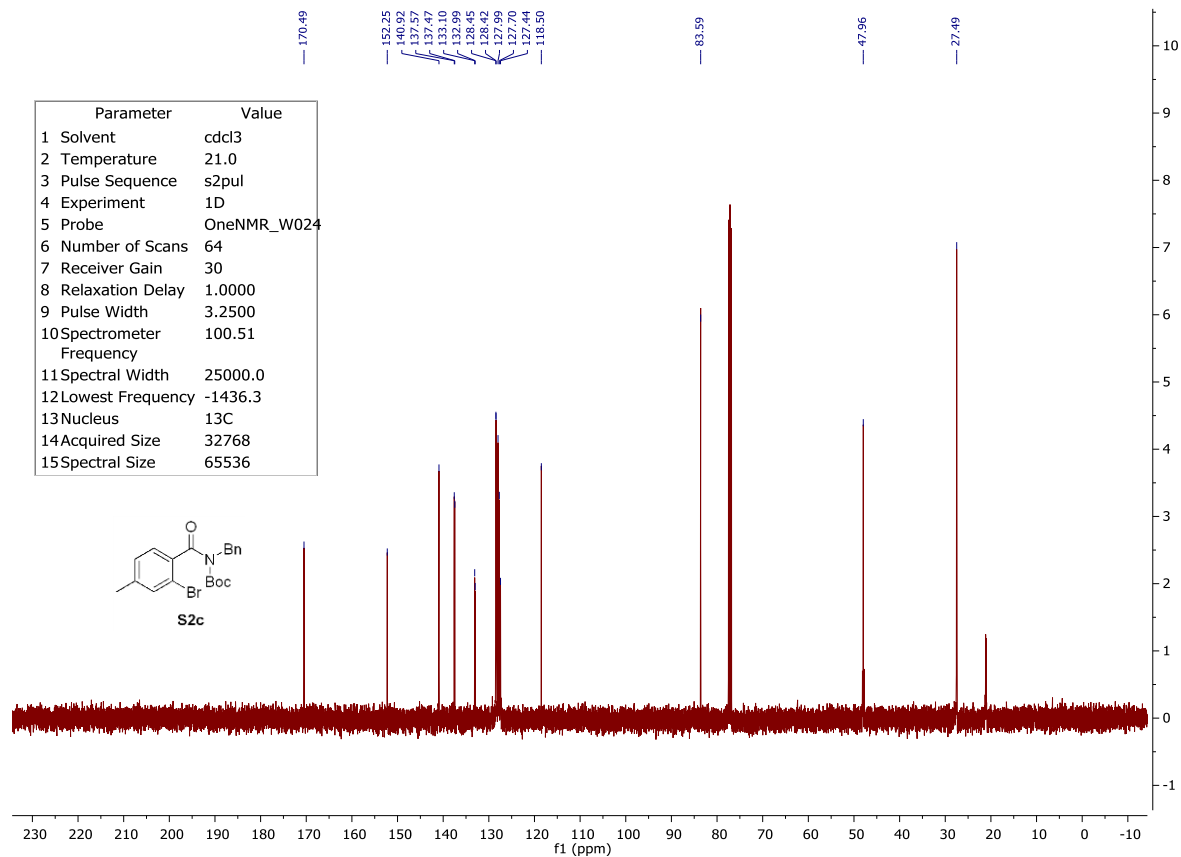

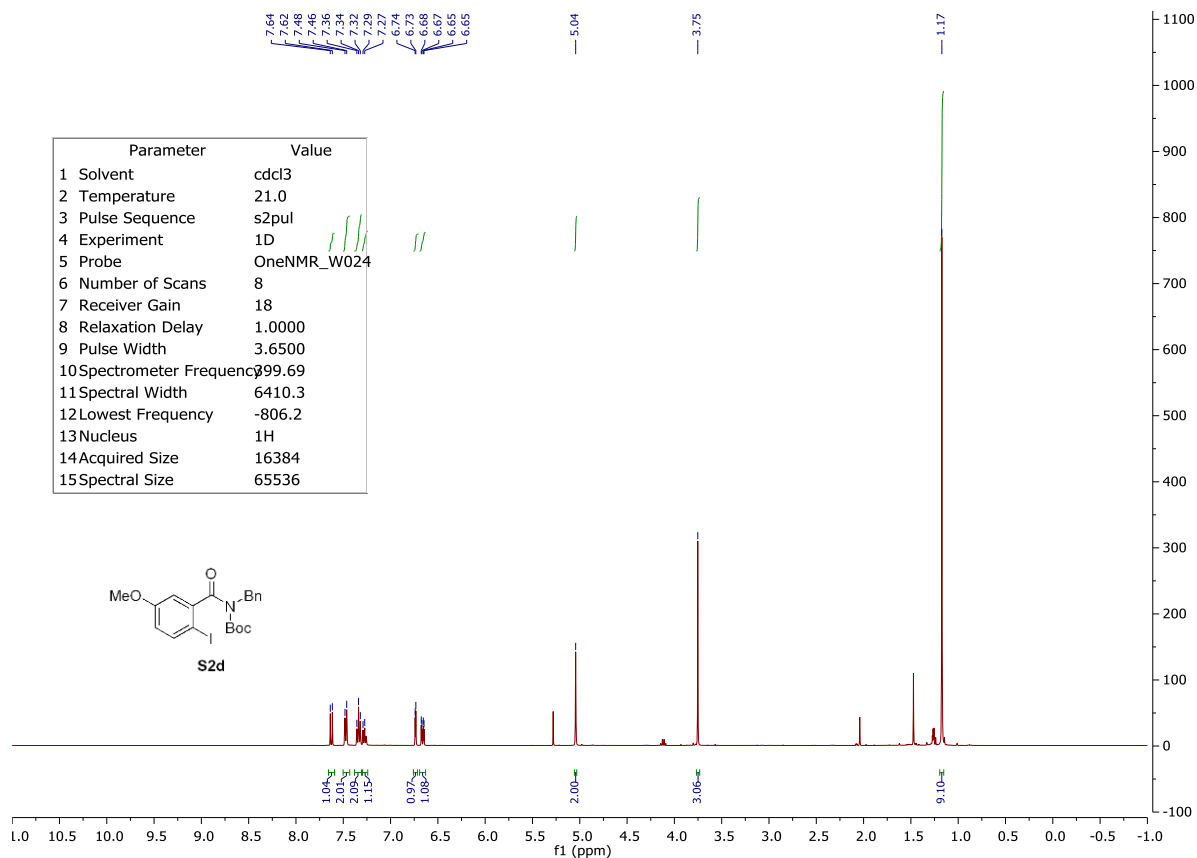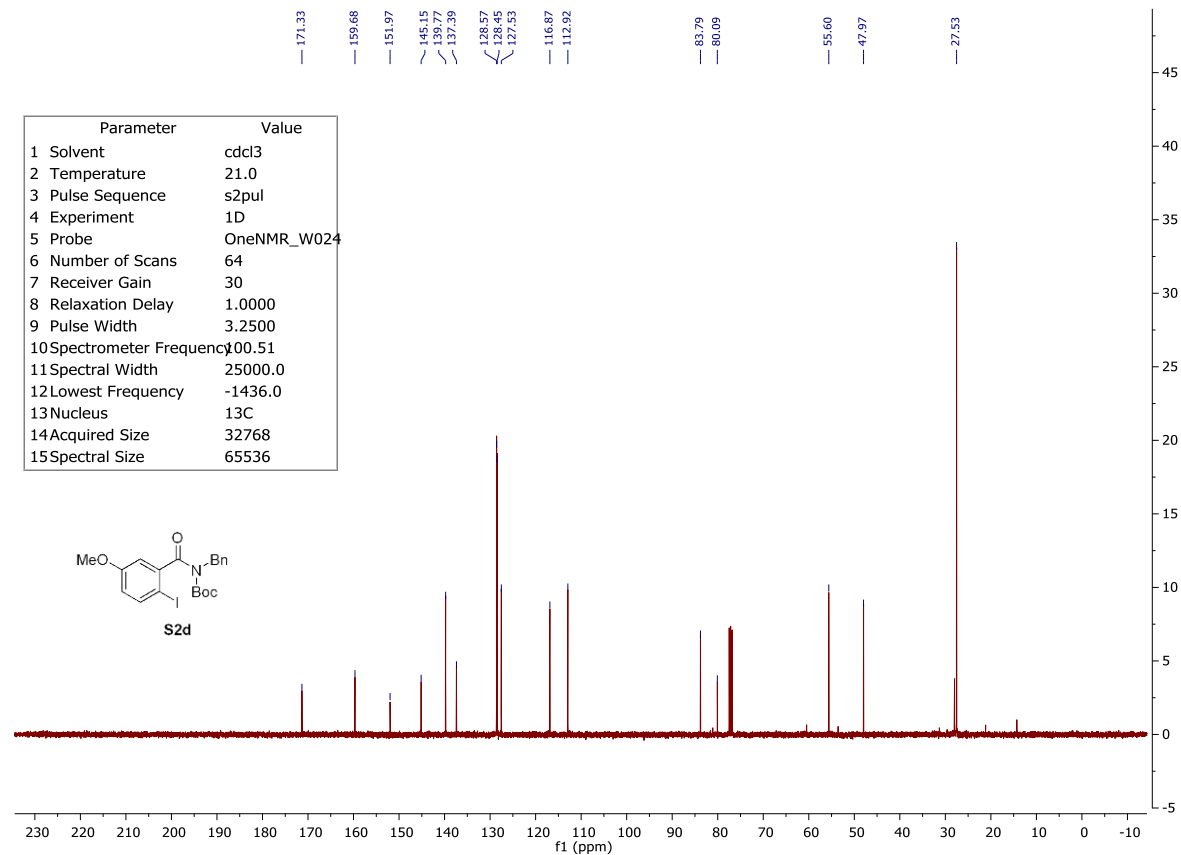

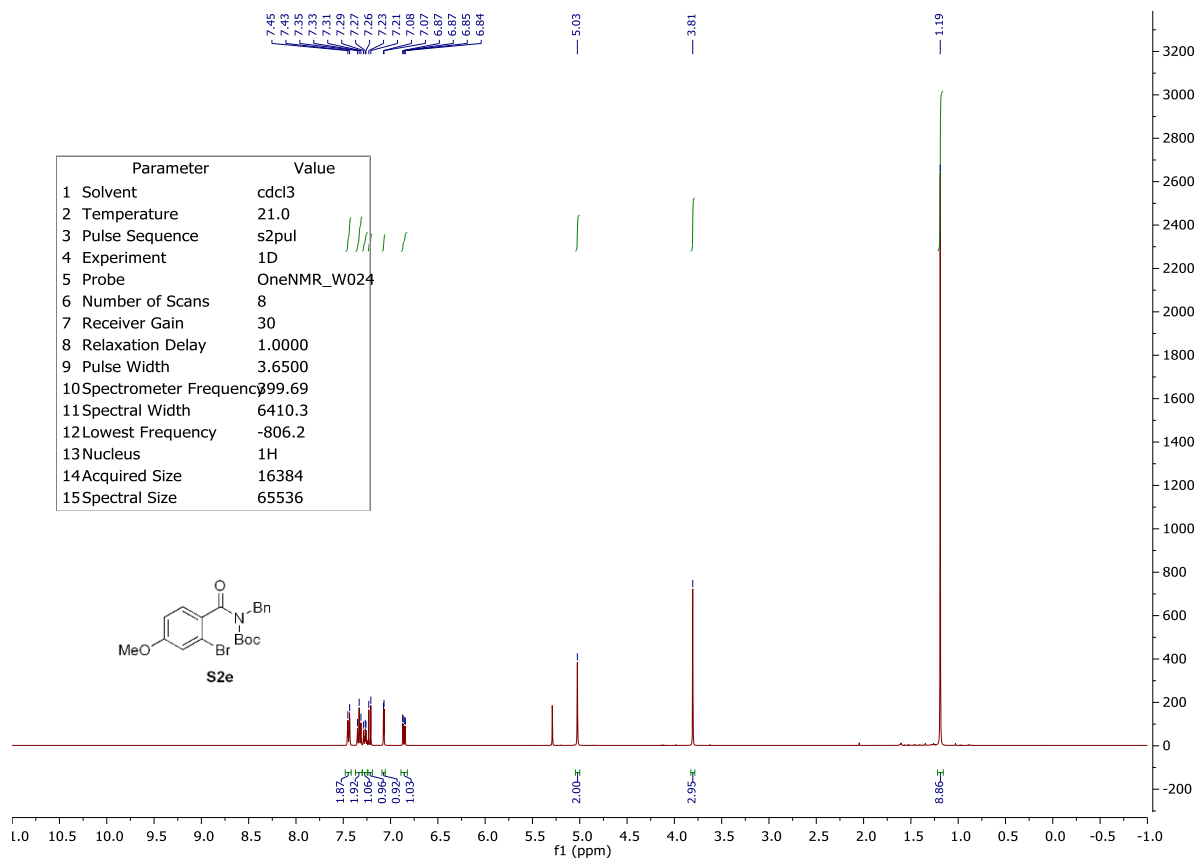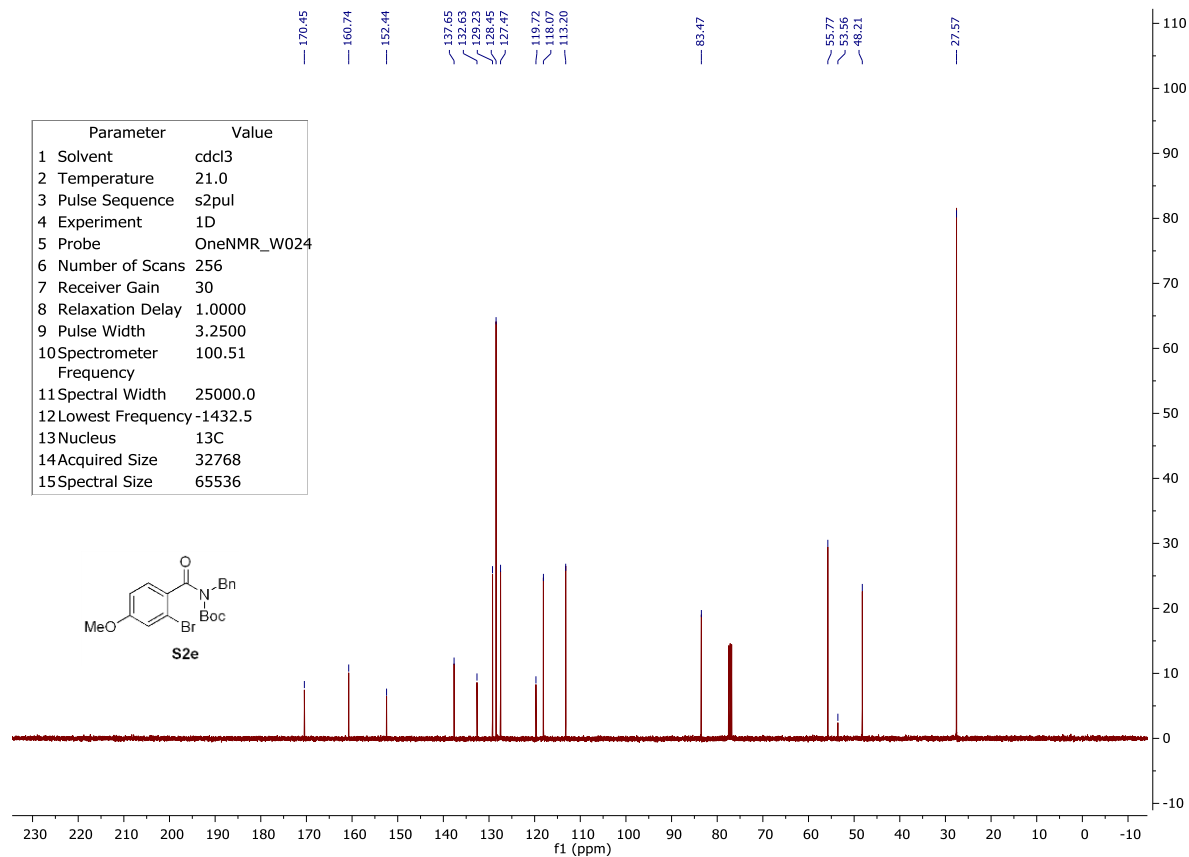

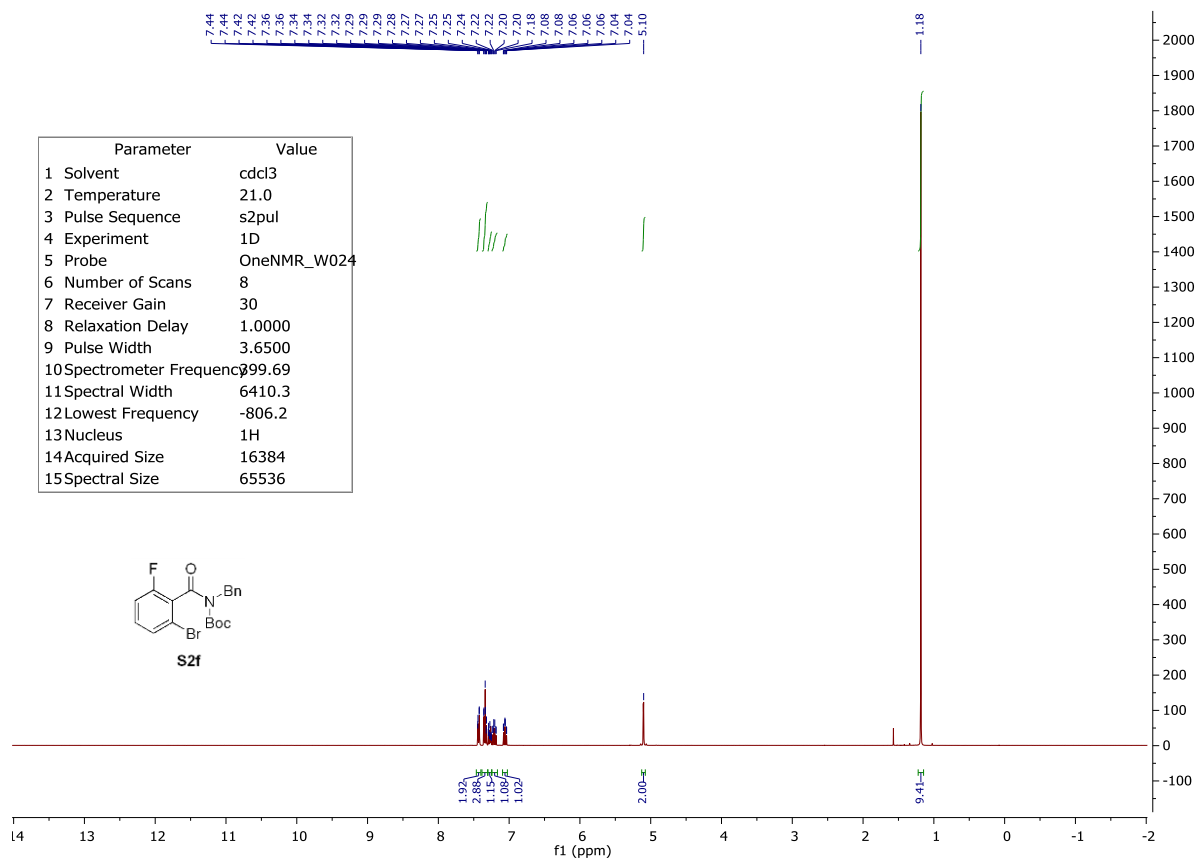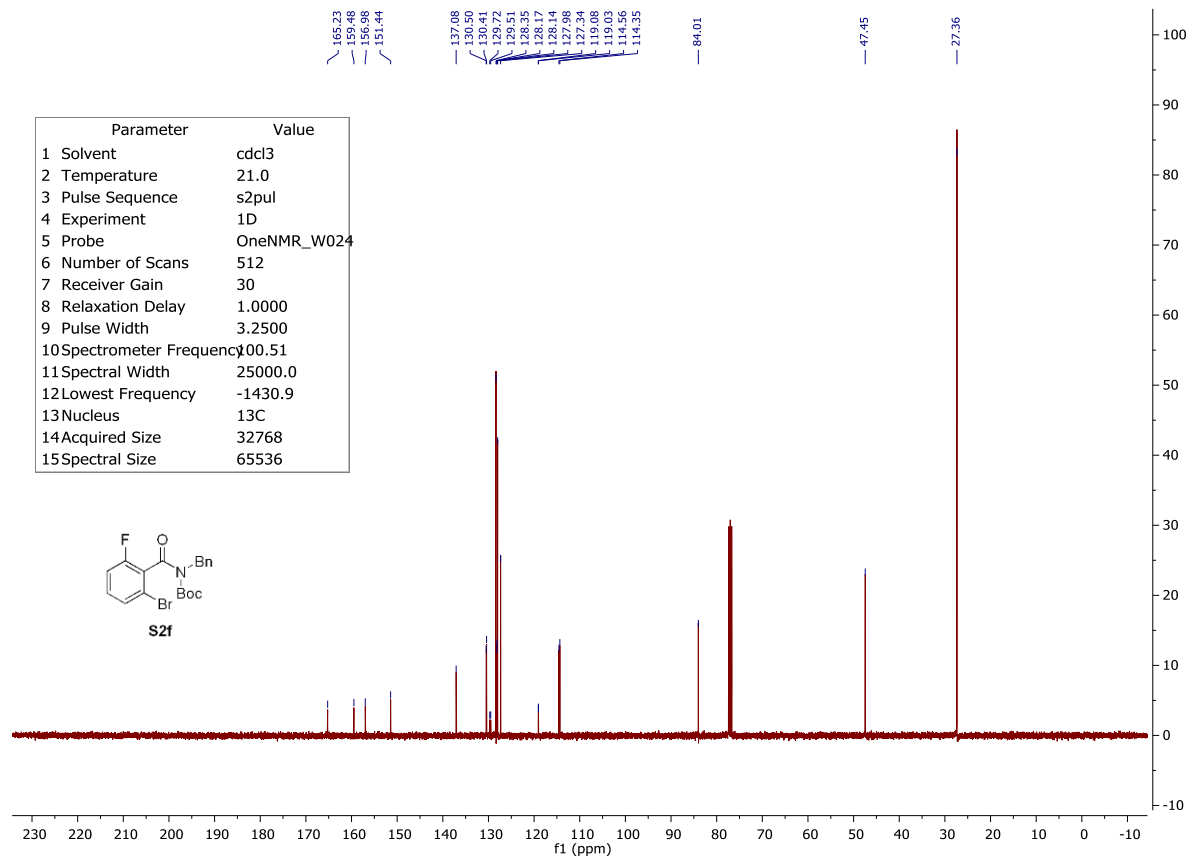



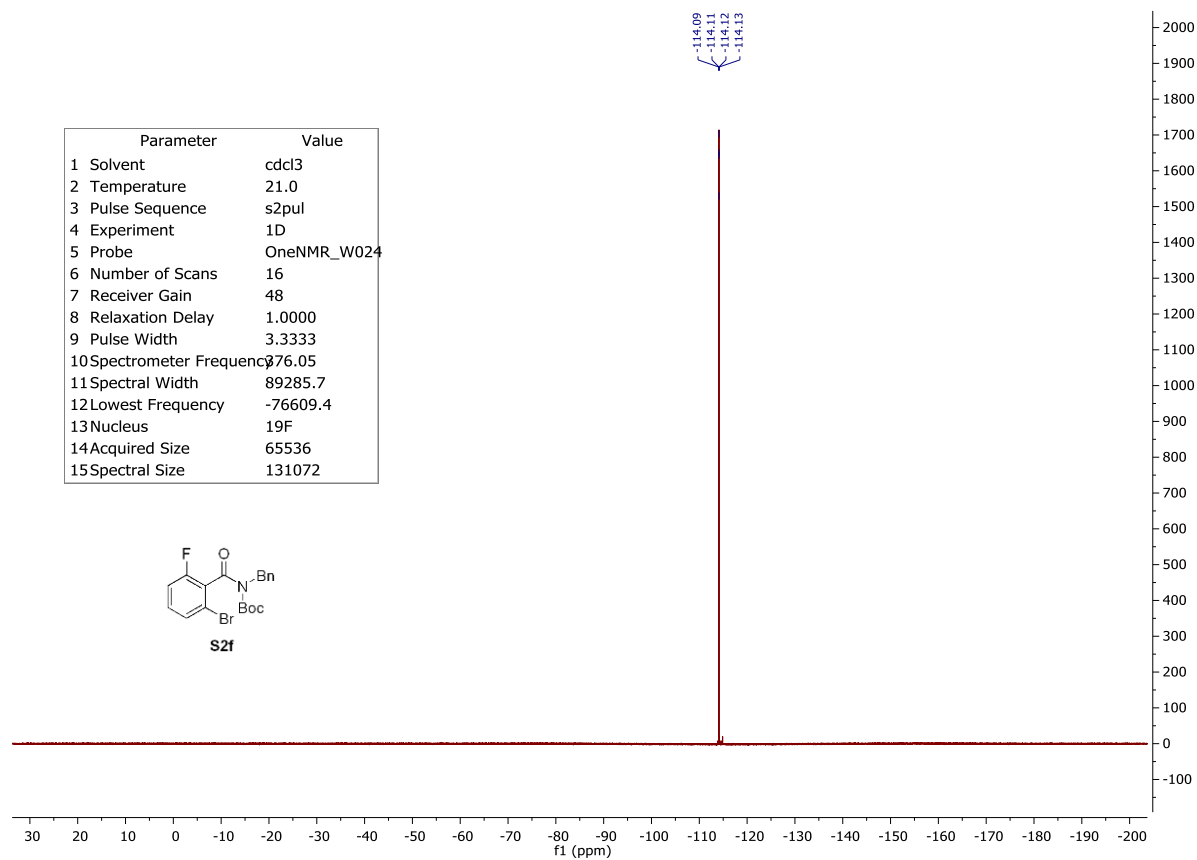

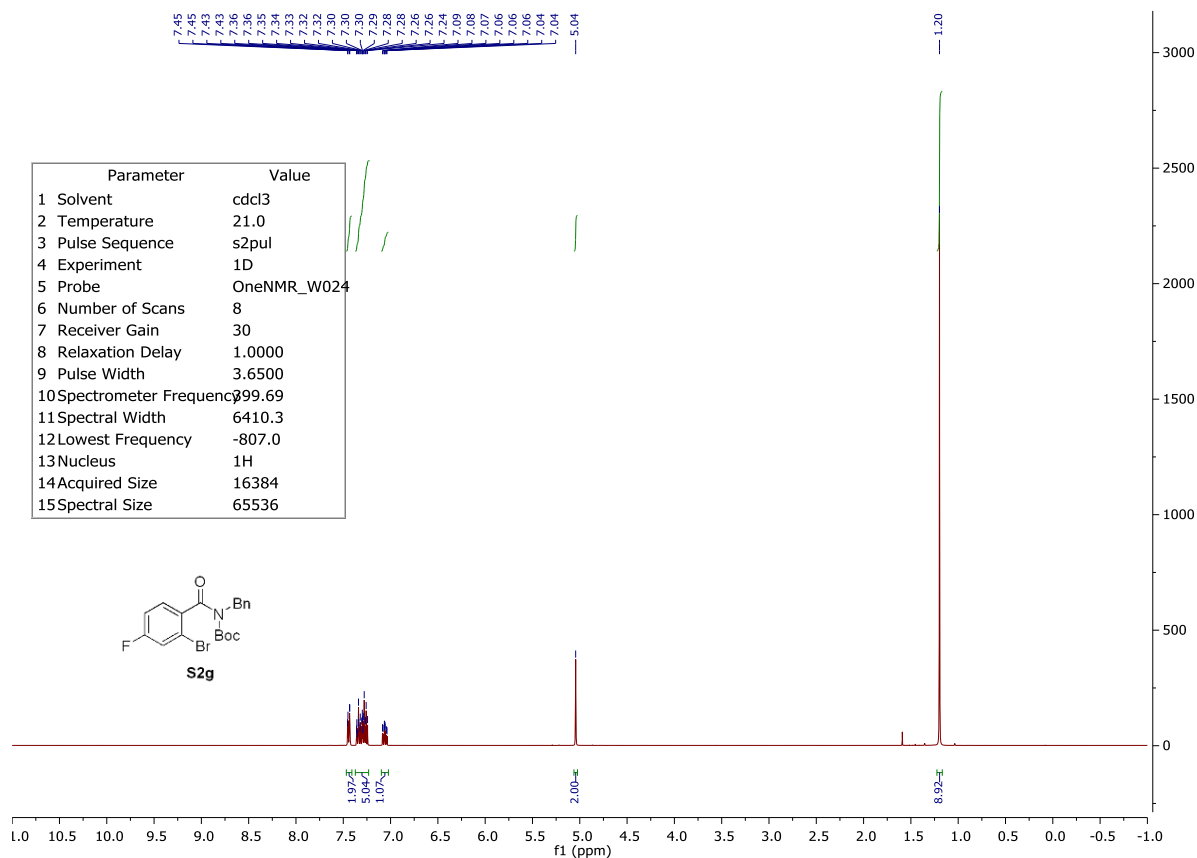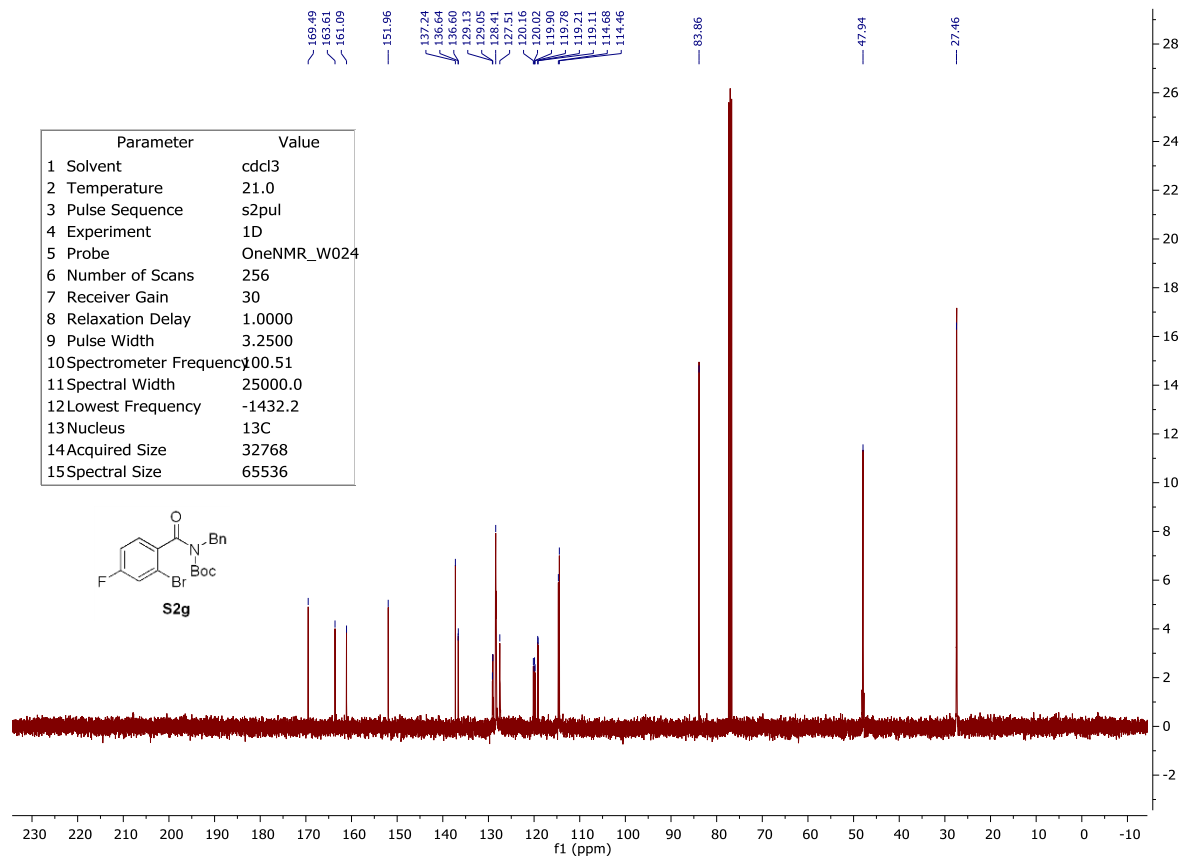

| Parameter                 | Value       |
|---------------------------|-------------|
| 1 Solvent                 | cdcl3       |
| 2 Temperature             | 21.0        |
| 3 Pulse Sequence          | s2pul       |
| 4 Experiment              | 1D          |
| 5 Probe                   | OneNMR_W024 |
| 6 Number of Scans         | 16          |
| 7 Receiver Gain           | 56          |
| 8 Relaxation Delay        | 1.0000      |
| 9 Pulse Width             | 3.3333      |
| 10 Spectrometer Frequency | 76.05       |
| 11 Spectral Width         | 89285.7     |
| 12 Lowest Frequency       | -76610.2    |
| 13 Nucleus                | 19F         |
| 14 Acquired Size          | 65536       |
| 15 Spectral Size          | 131072      |

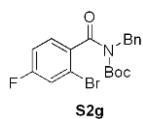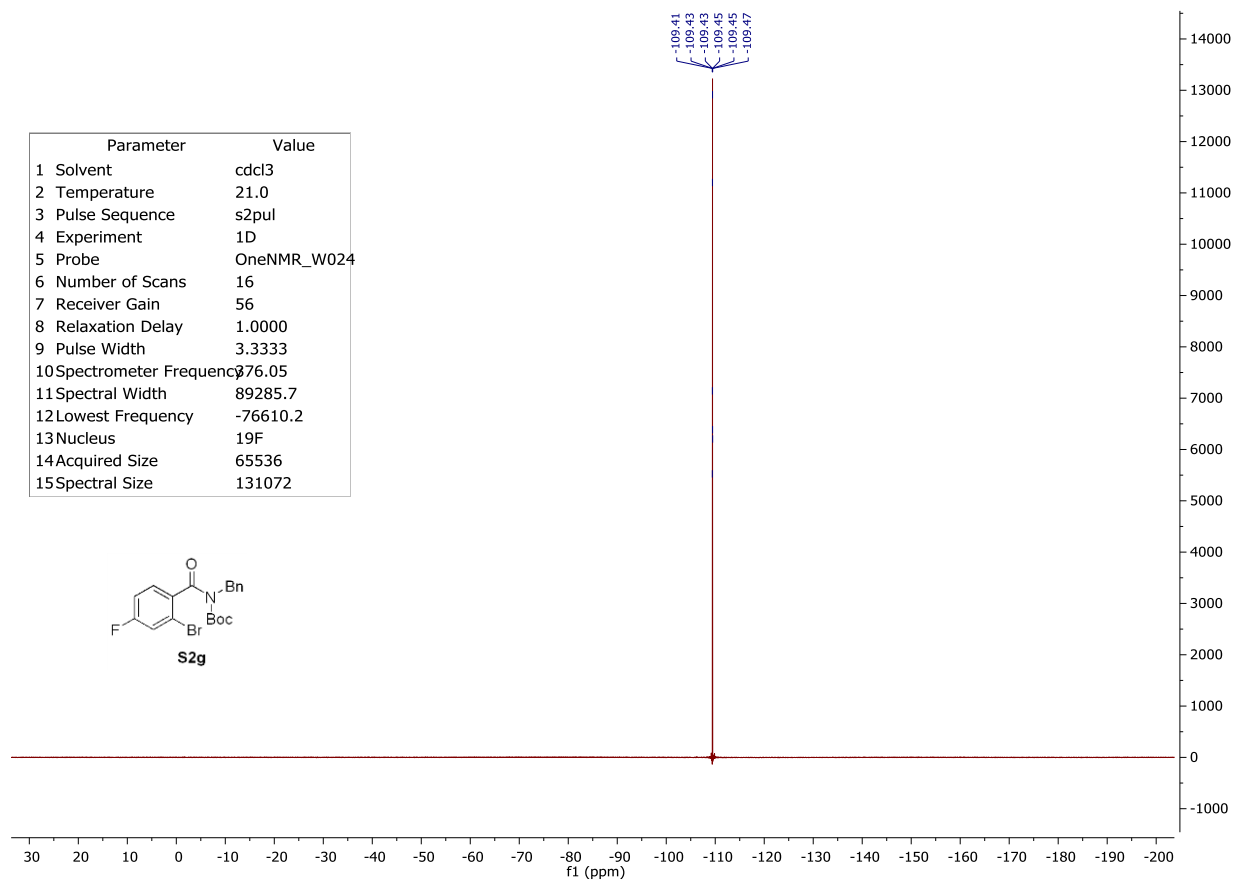

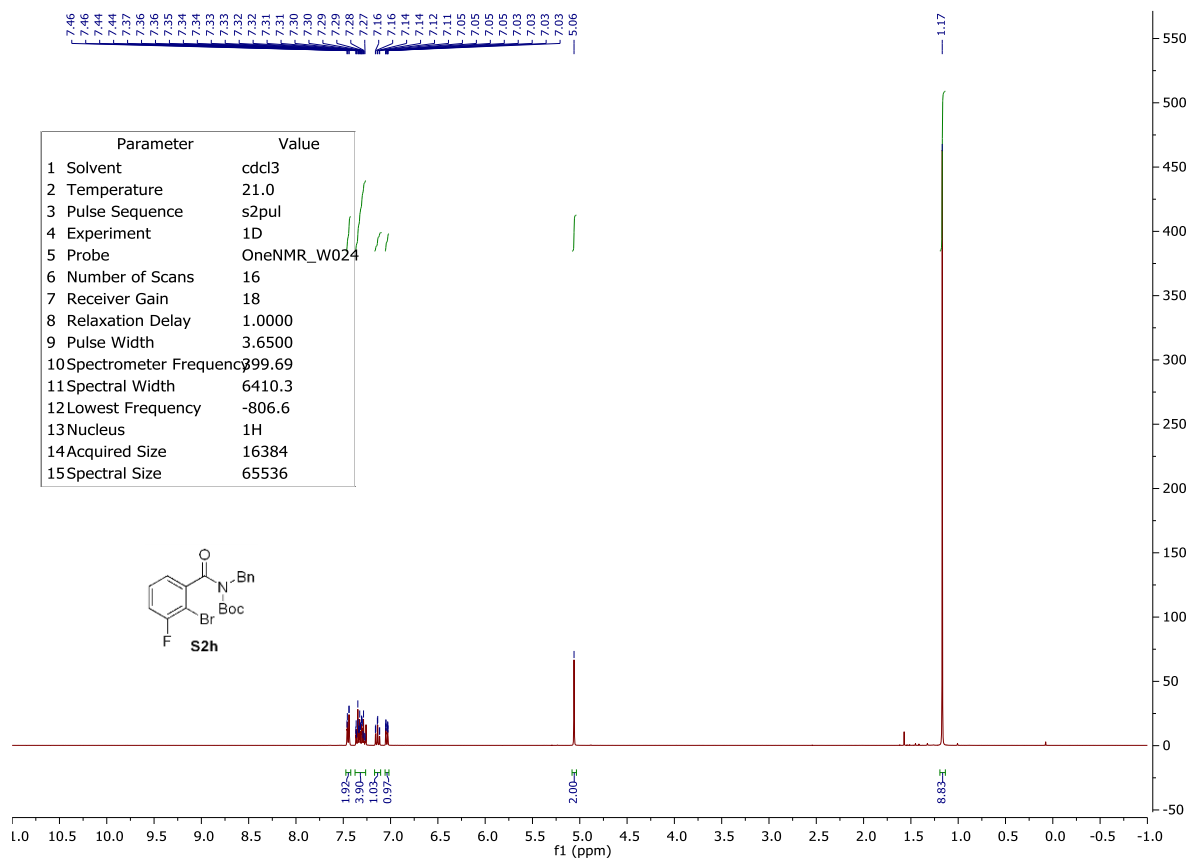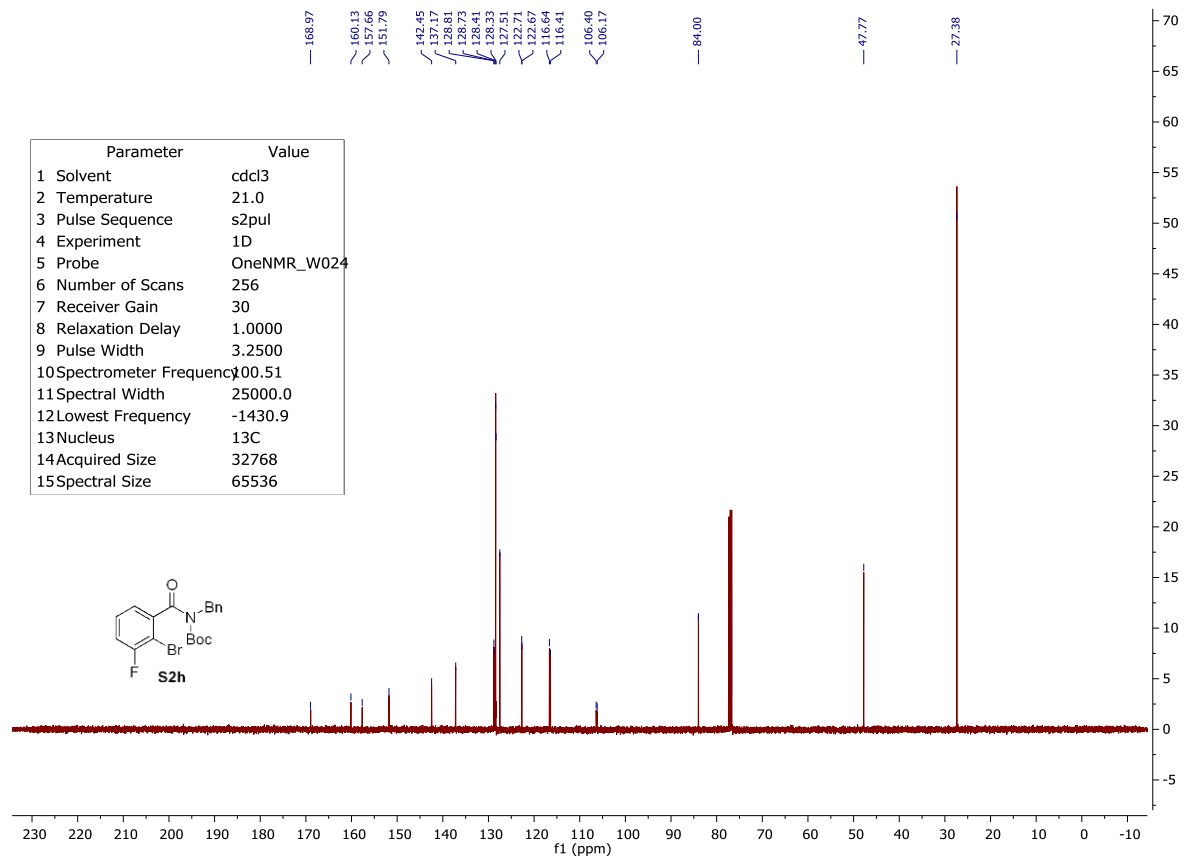

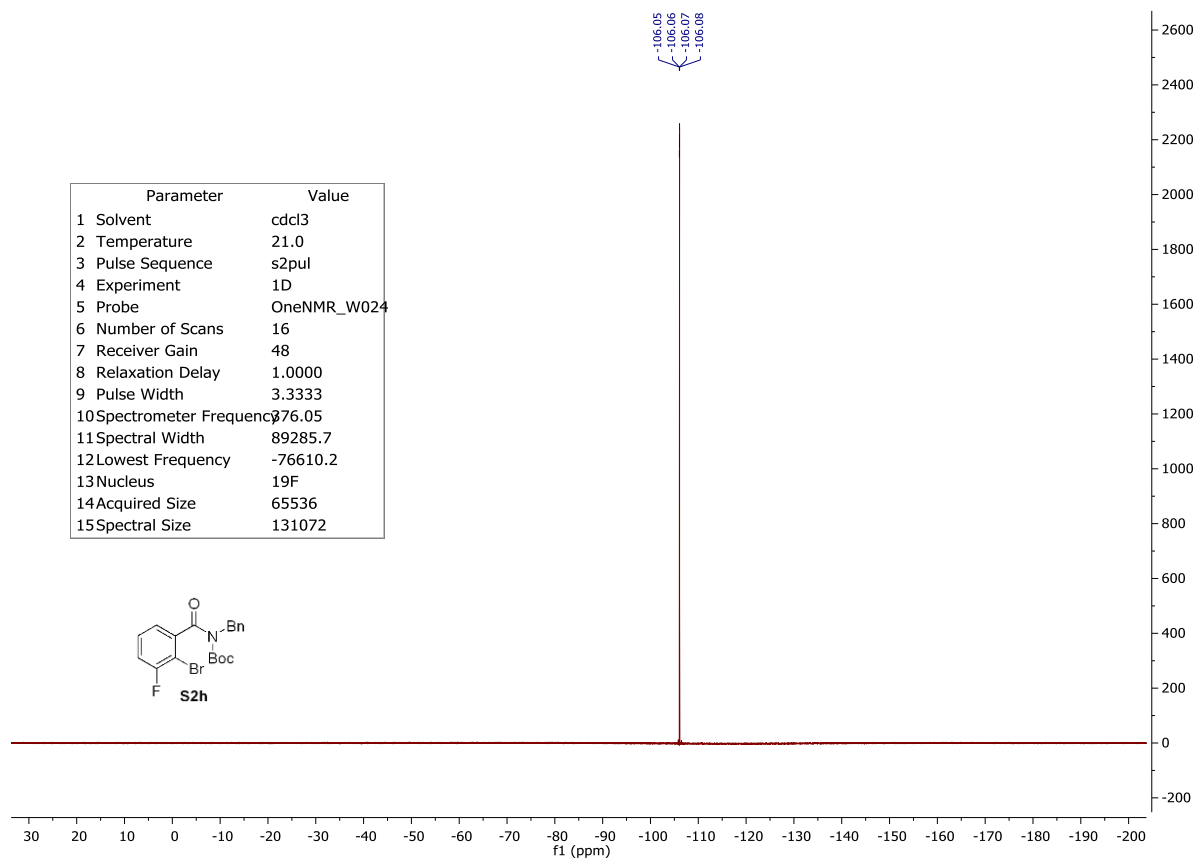

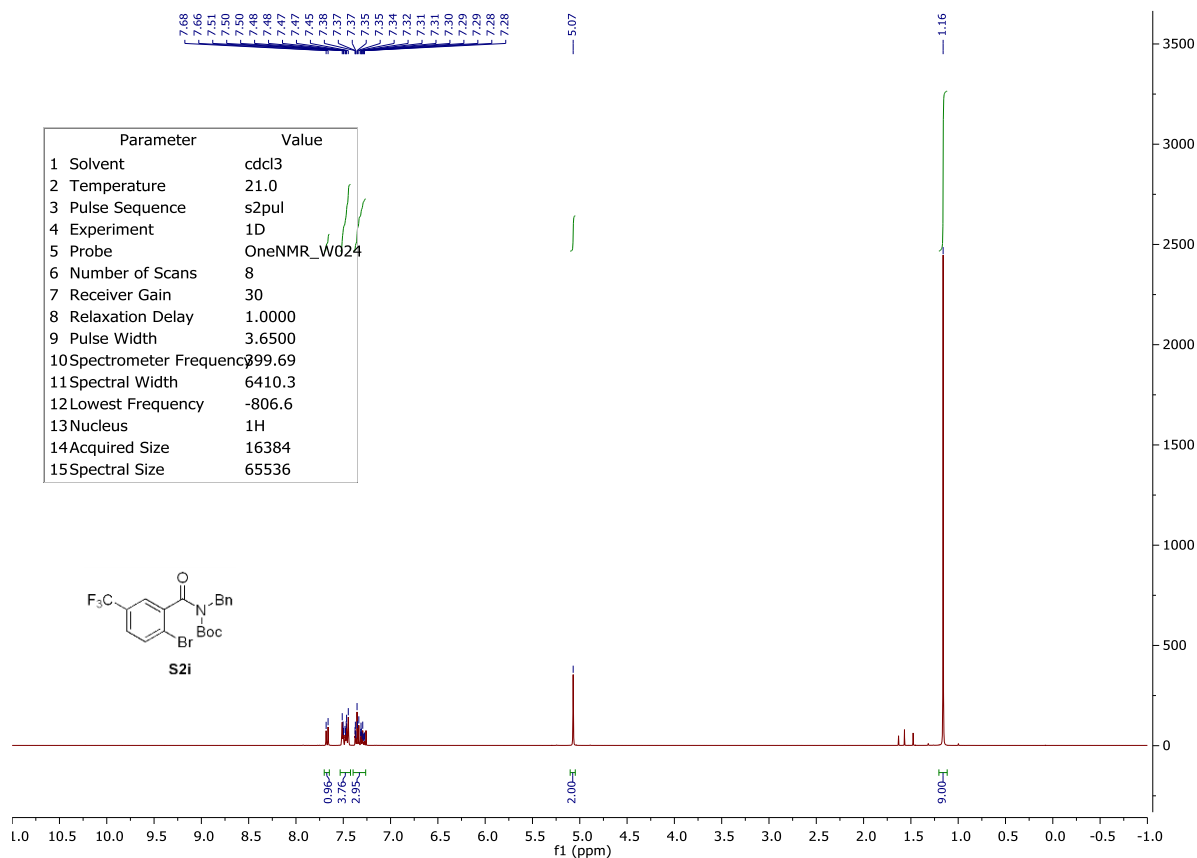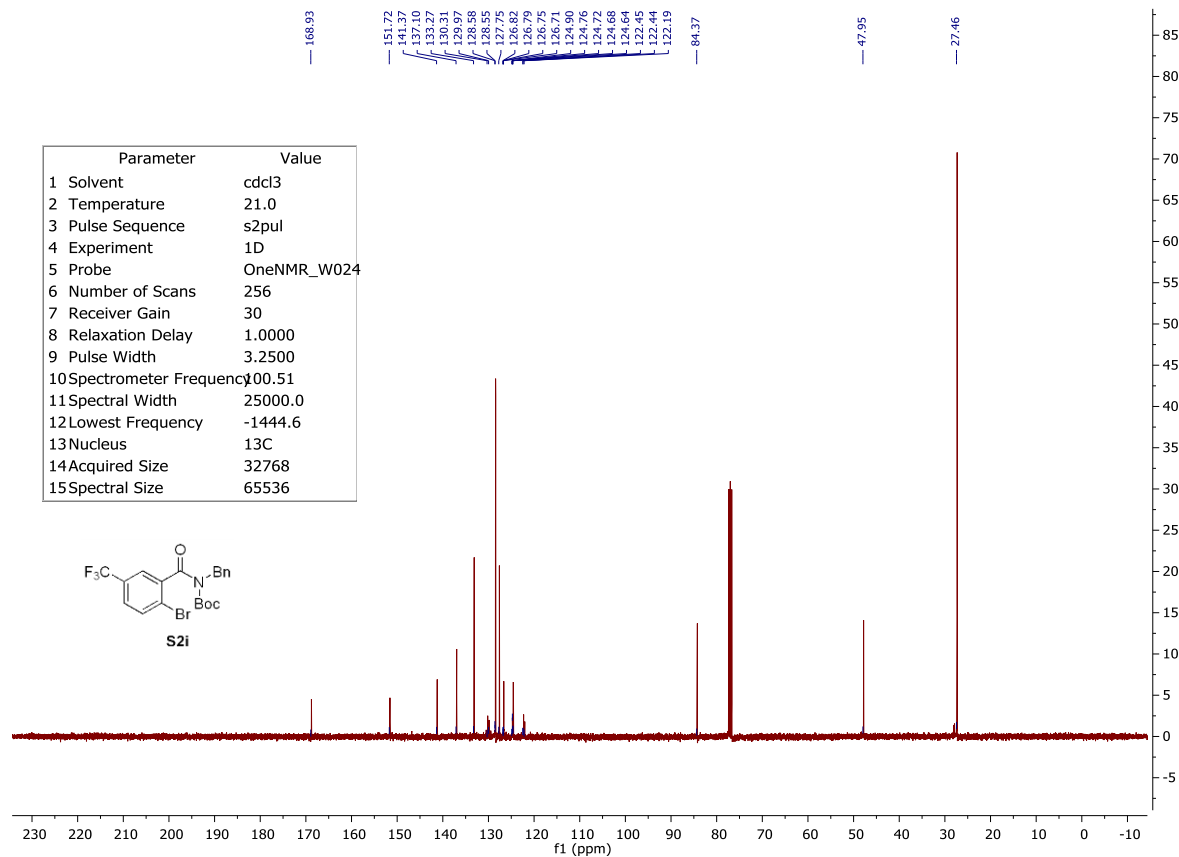

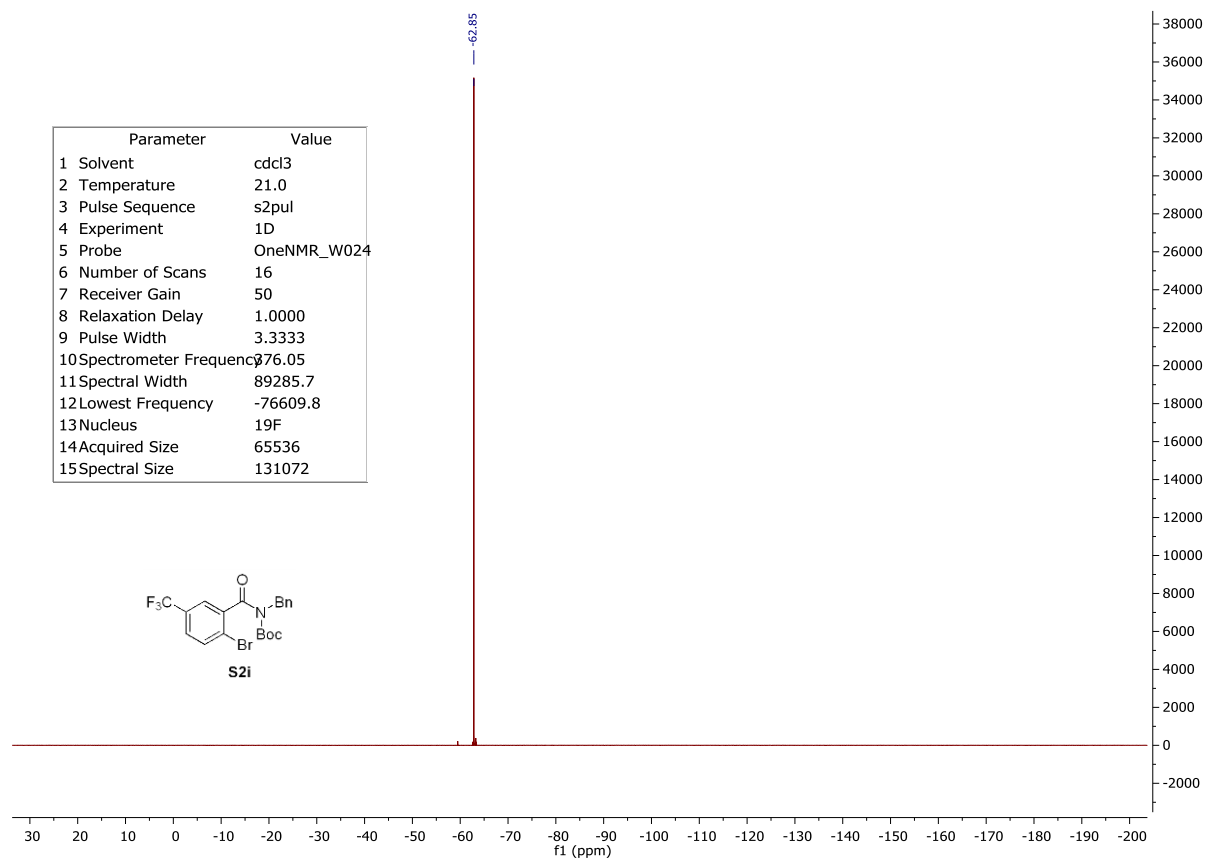

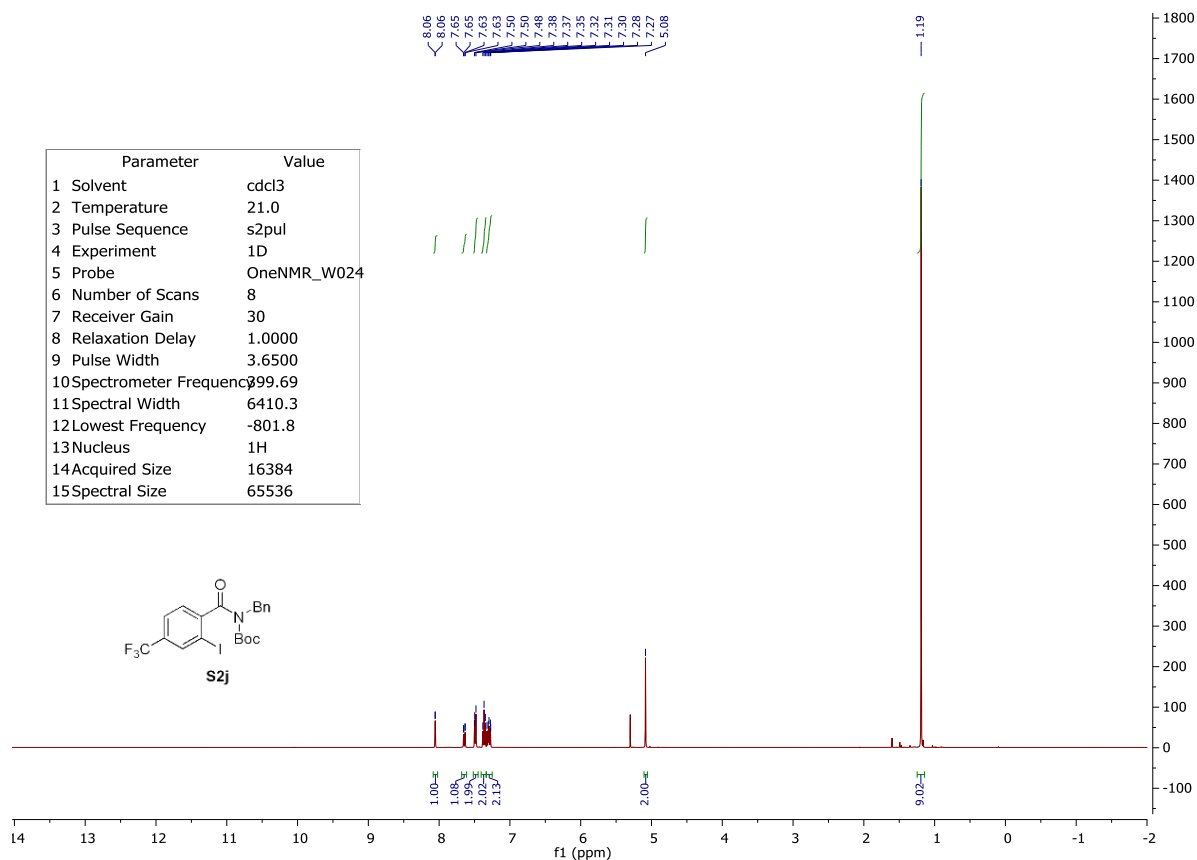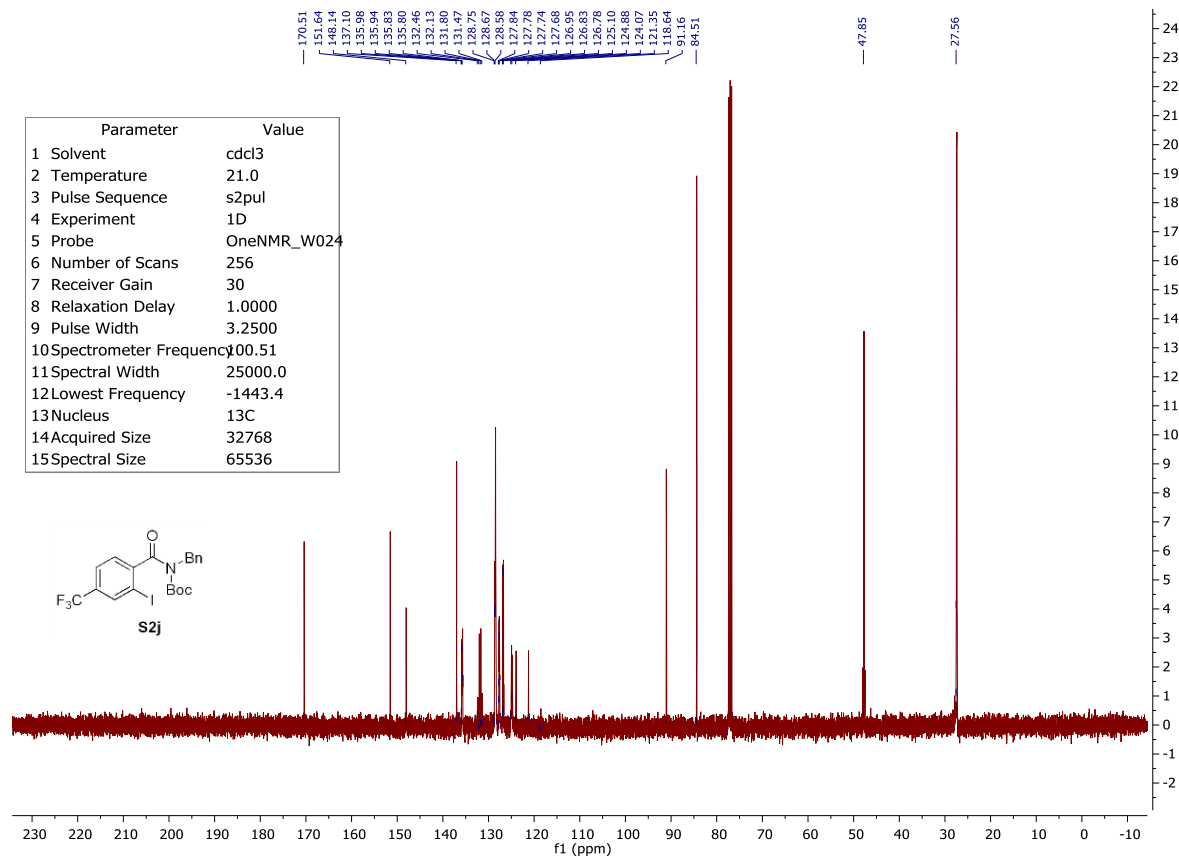



| Parameter                 | Value       |
|---------------------------|-------------|
| 1 Solvent                 | cdcl3       |
| 2 Temperature             | 21.0        |
| 3 Pulse Sequence          | s2pul       |
| 4 Experiment              | 1D          |
| 5 Probe                   | OneNMR_W024 |
| 6 Number of Scans         | 16          |
| 7 Receiver Gain           | 44          |
| 8 Relaxation Delay        | 1.0000      |
| 9 Pulse Width             | 3.3333      |
| 10 Spectrometer Frequency | 376.05      |
| 11 Spectral Width         | 89285.7     |
| 12 Lowest Frequency       | -76605.3    |
| 13 Nucleus                | 19F         |
| 14 Acquired Size          | 65536       |
| 15 Spectral Size          | 131072      |

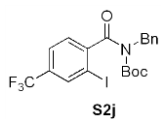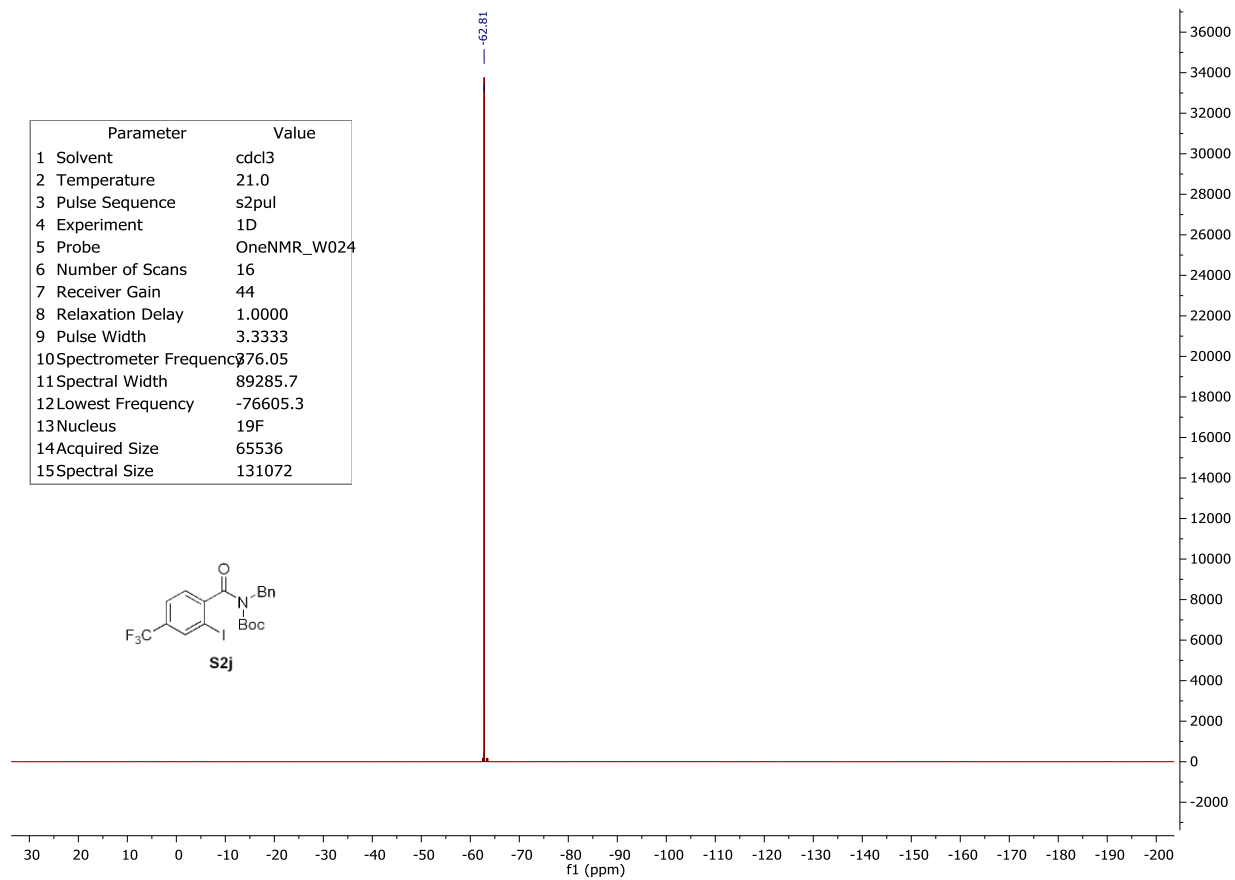

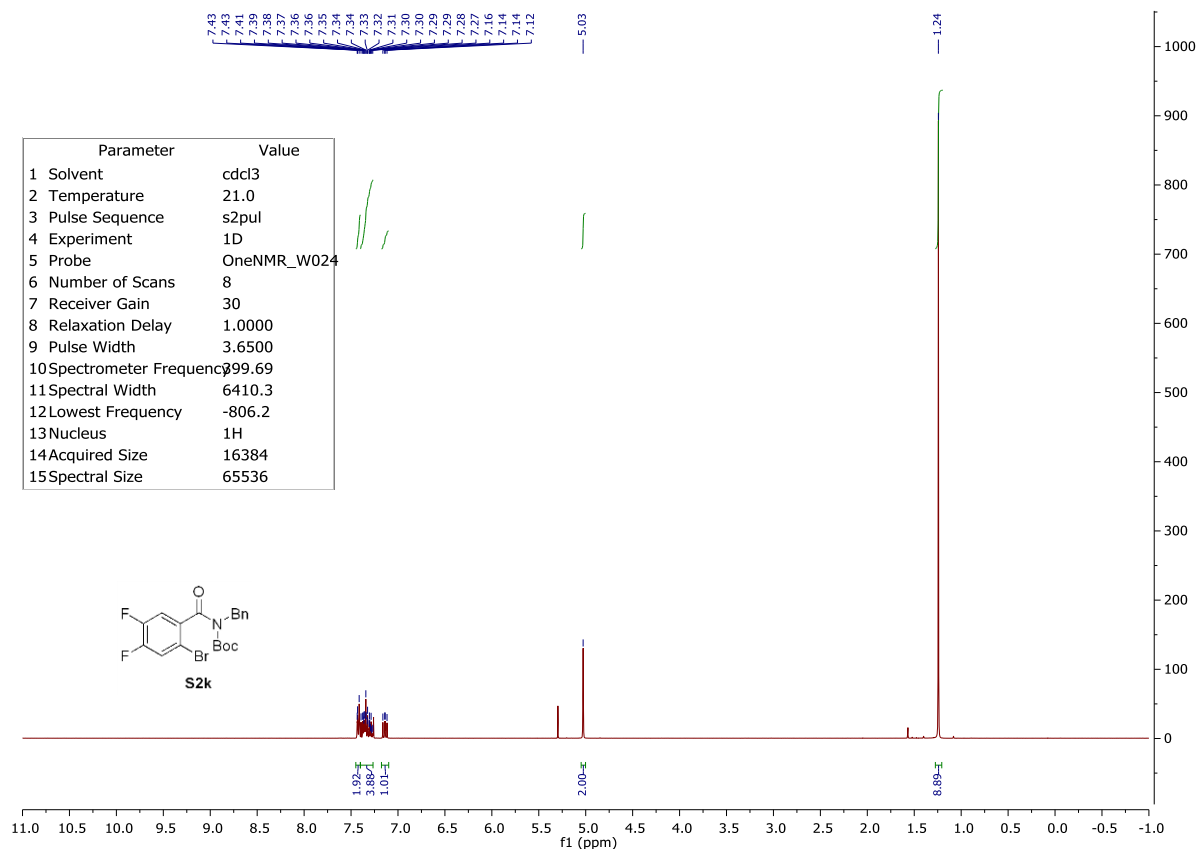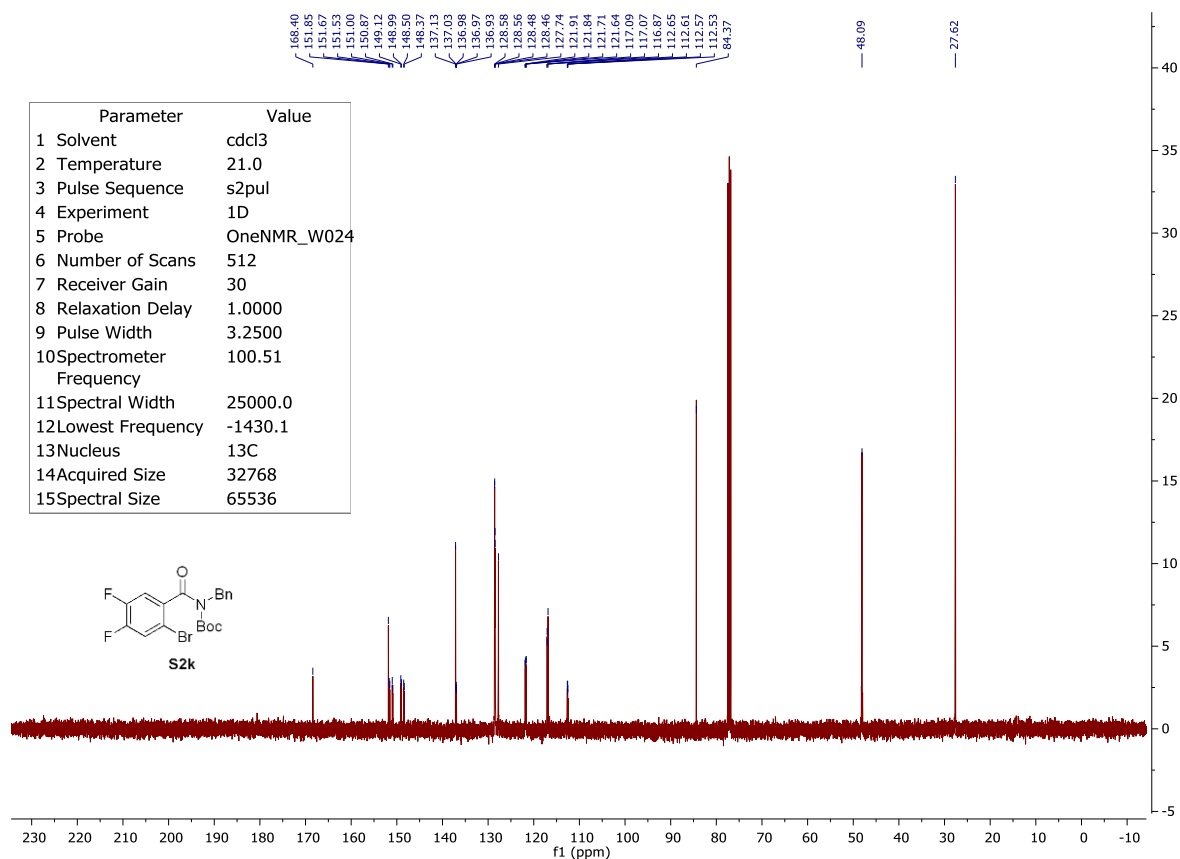

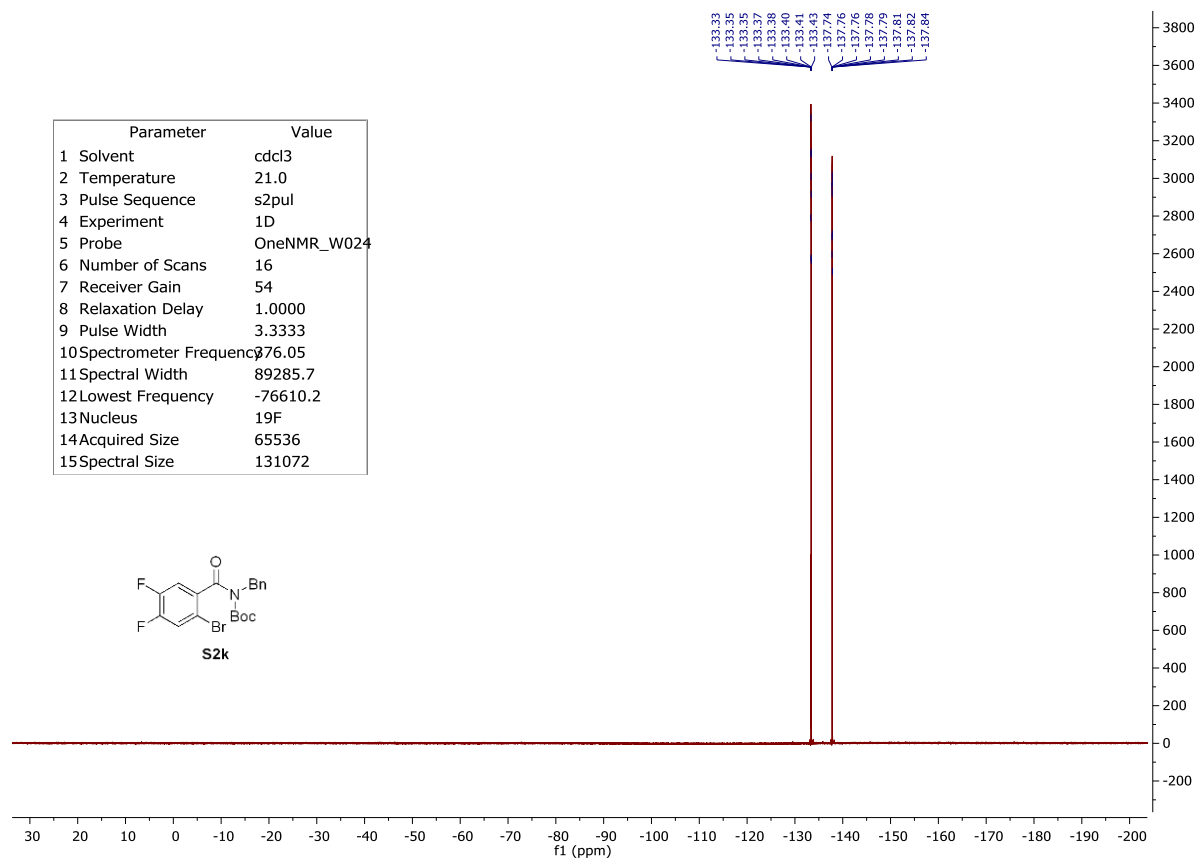

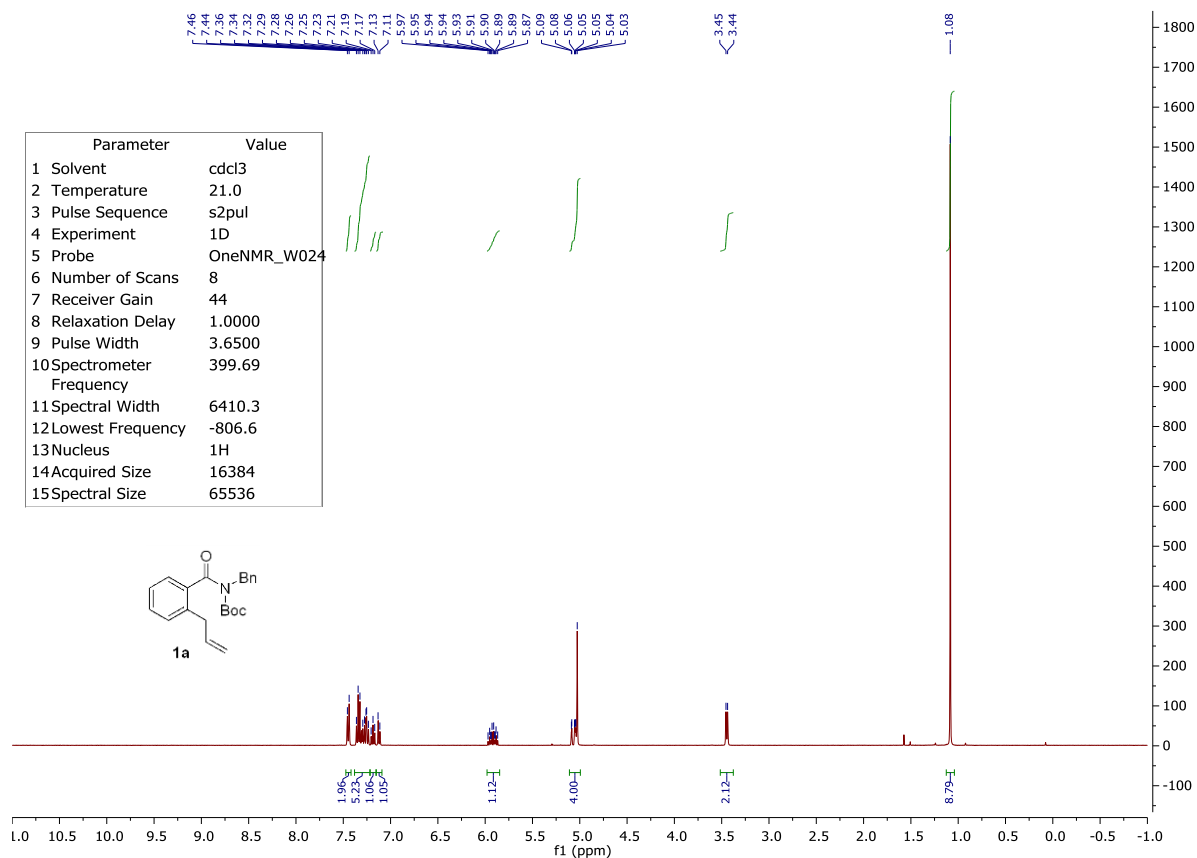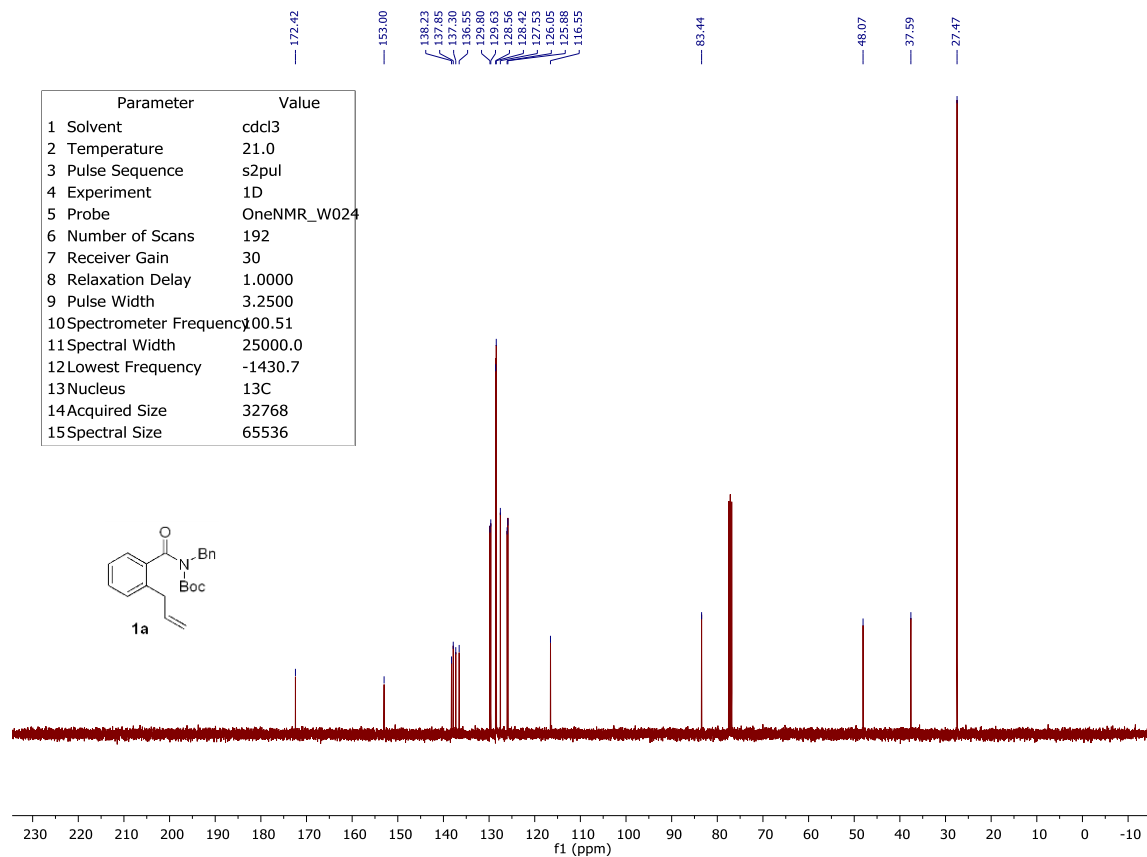

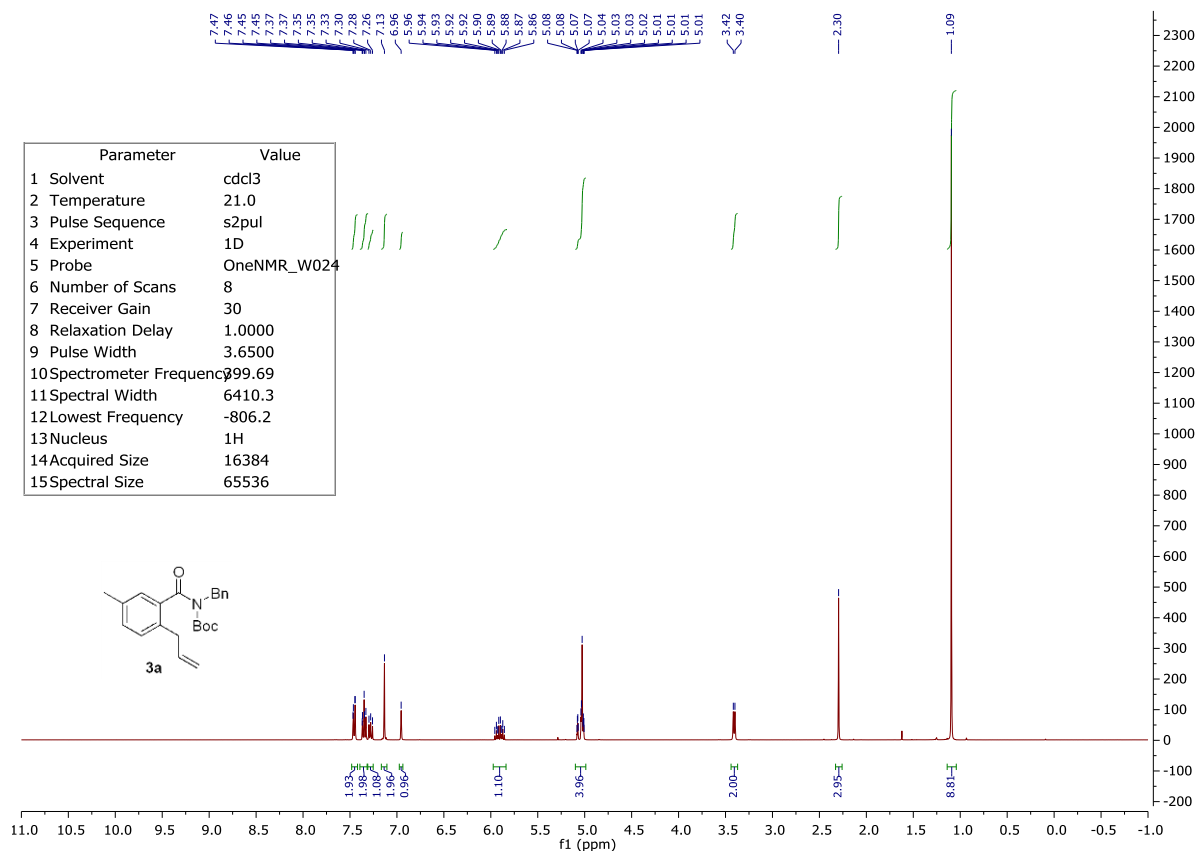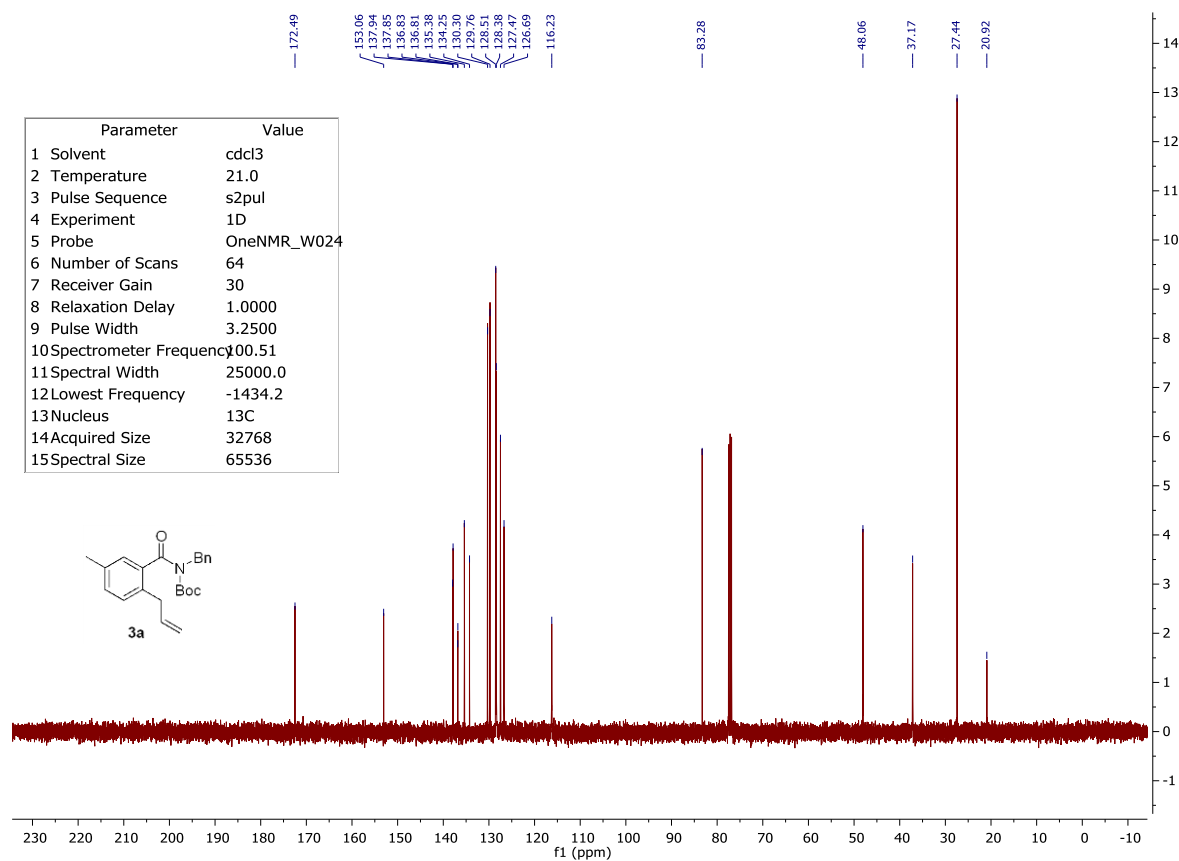

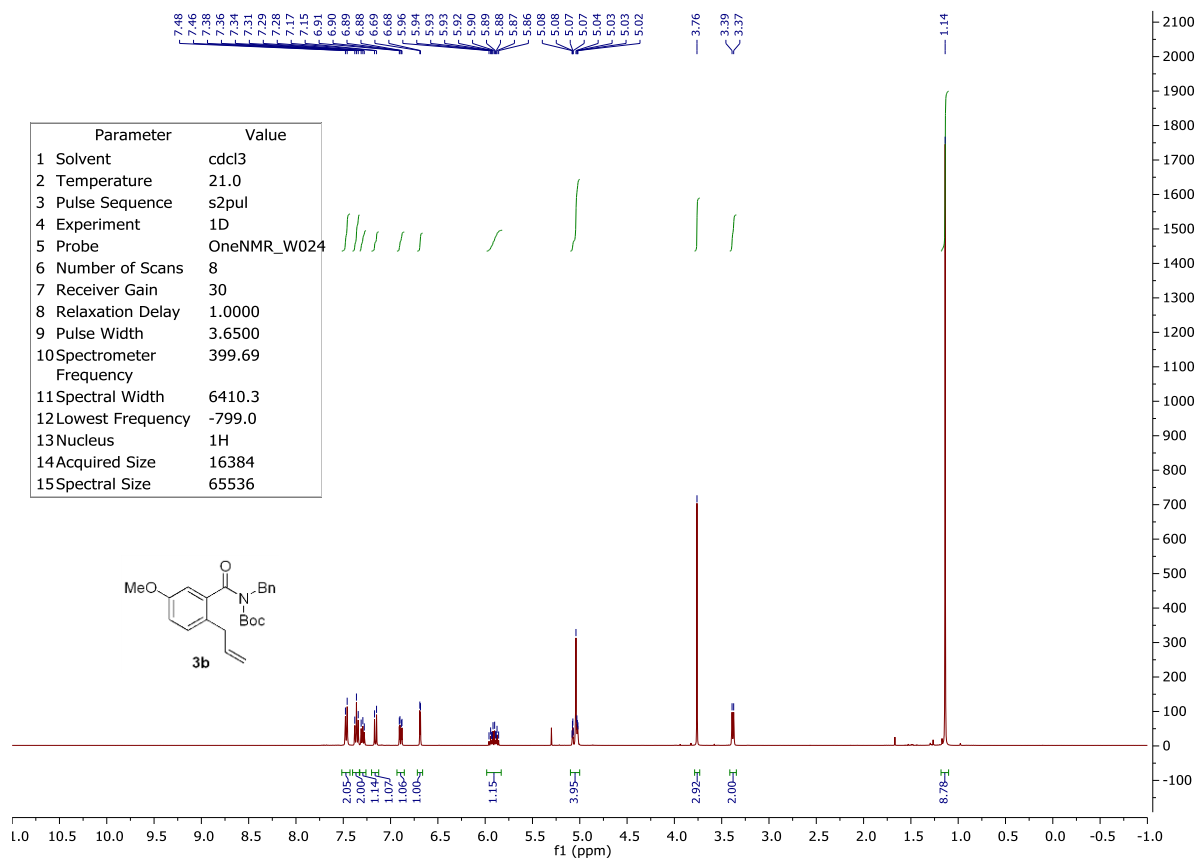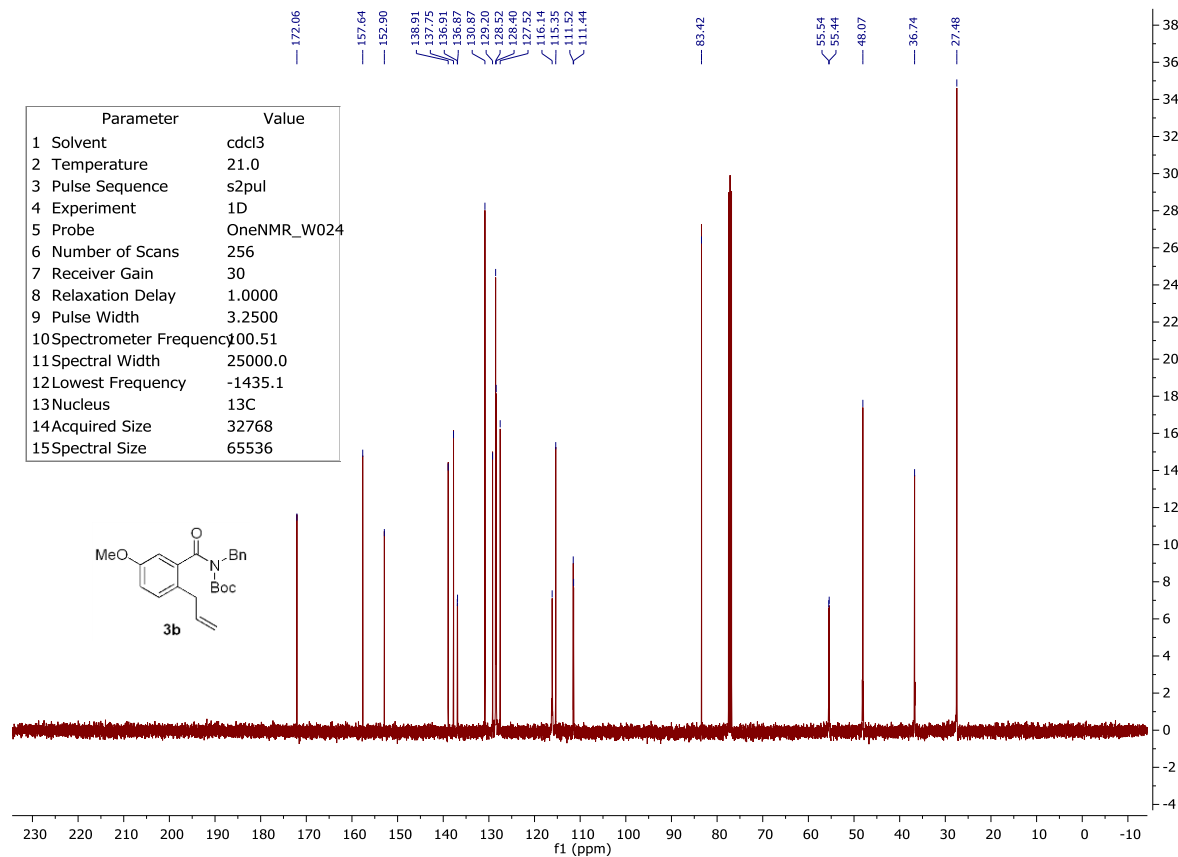

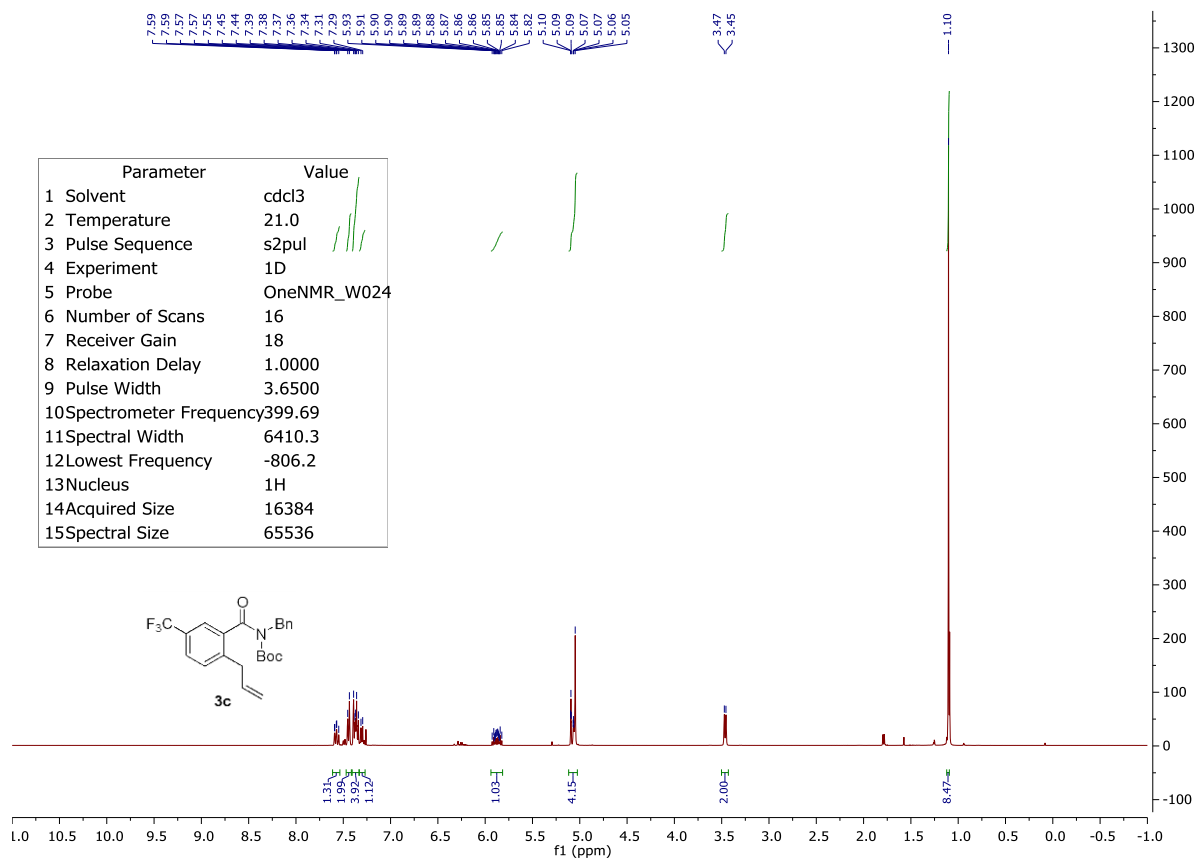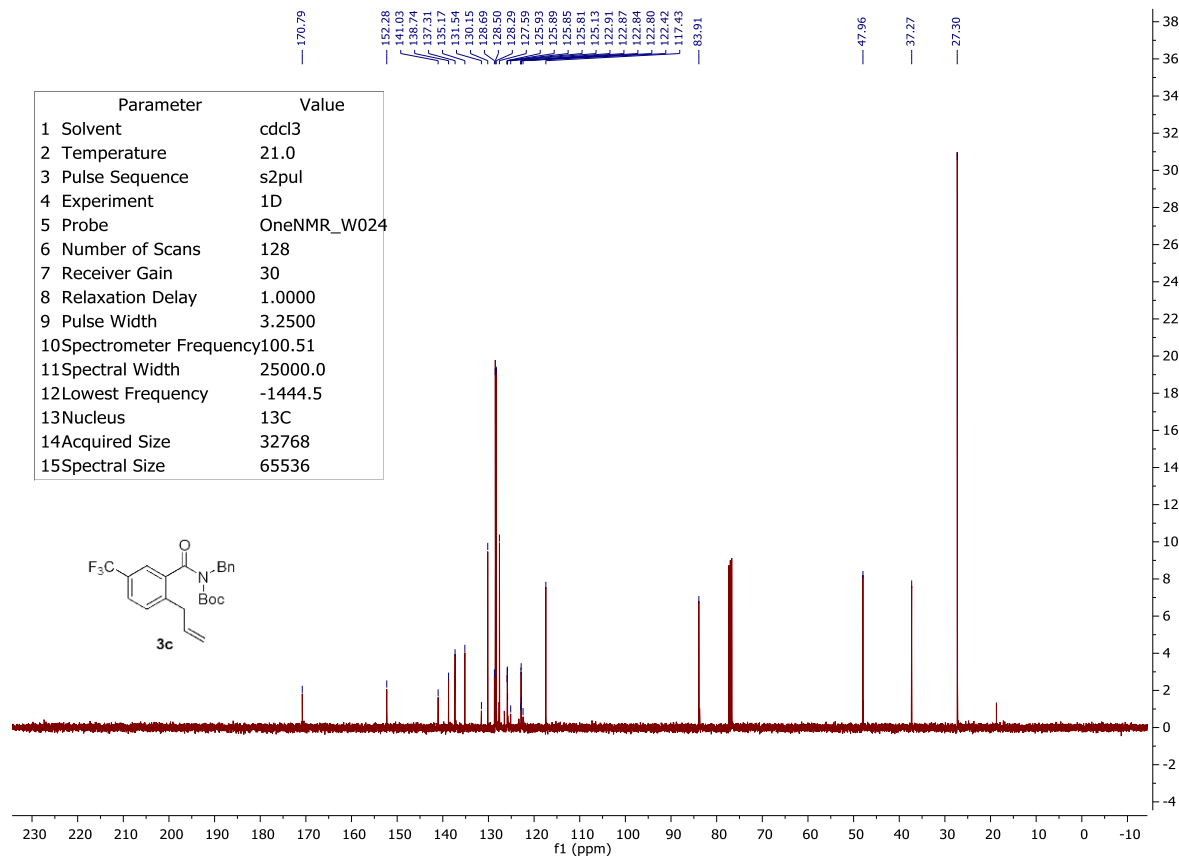

| Parameter                | Value       |
|--------------------------|-------------|
| 1 Solvent                | cdcl3       |
| 2 Temperature            | 21.0        |
| 3 Pulse Sequence         | s2pul       |
| 4 Experiment             | 1D          |
| 5 Probe                  | OneNMR_W024 |
| 6 Number of Scans        | 16          |
| 7 Receiver Gain          | 50          |
| 8 Relaxation Delay       | 1.0000      |
| 9 Pulse Width            | 3.3333      |
| 10Spectrometer Frequency | 376.05      |
| 11Spectral Width         | 89285.7     |
| 12Lowest Frequency       | -76609.4    |
| 13Nucleus                | 19F         |
| 14Acquired Size          | 65536       |
| 15Spectral Size          | 131072      |

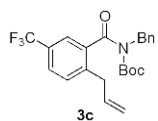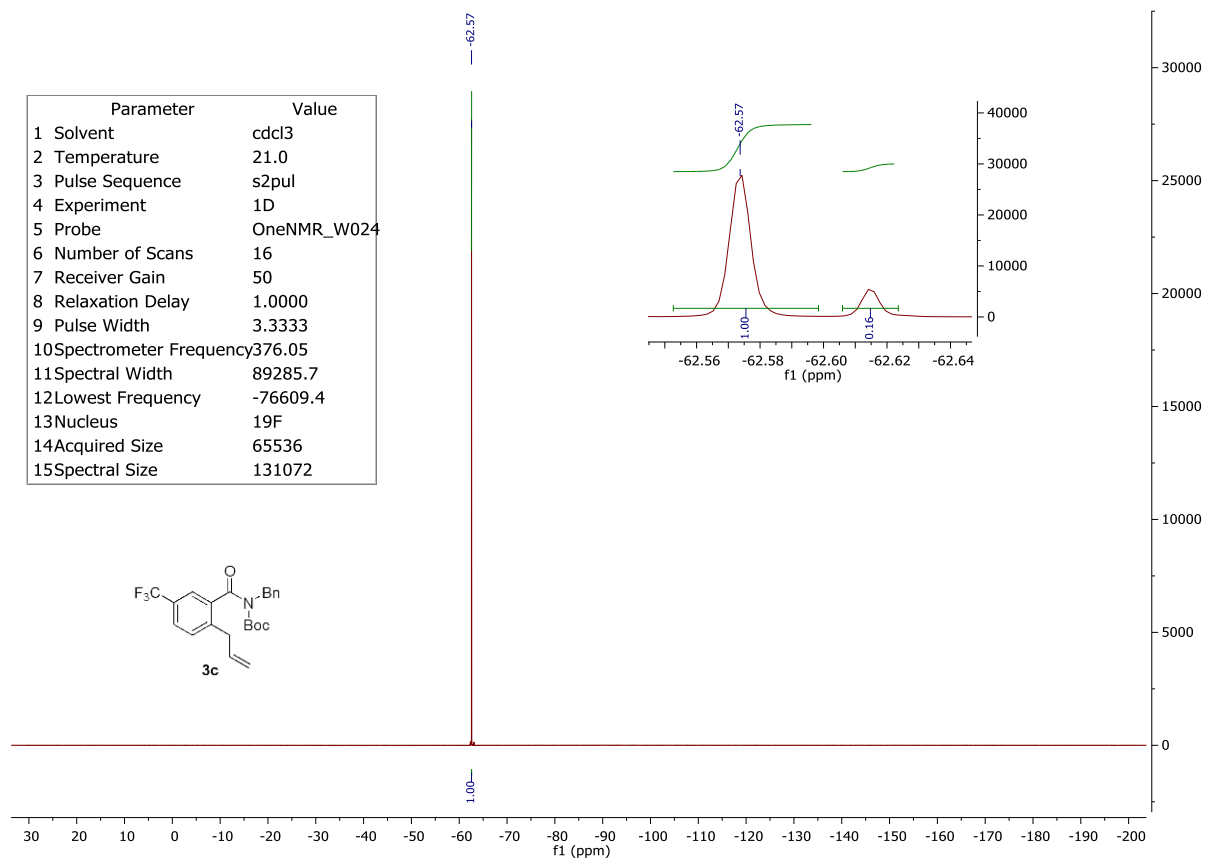



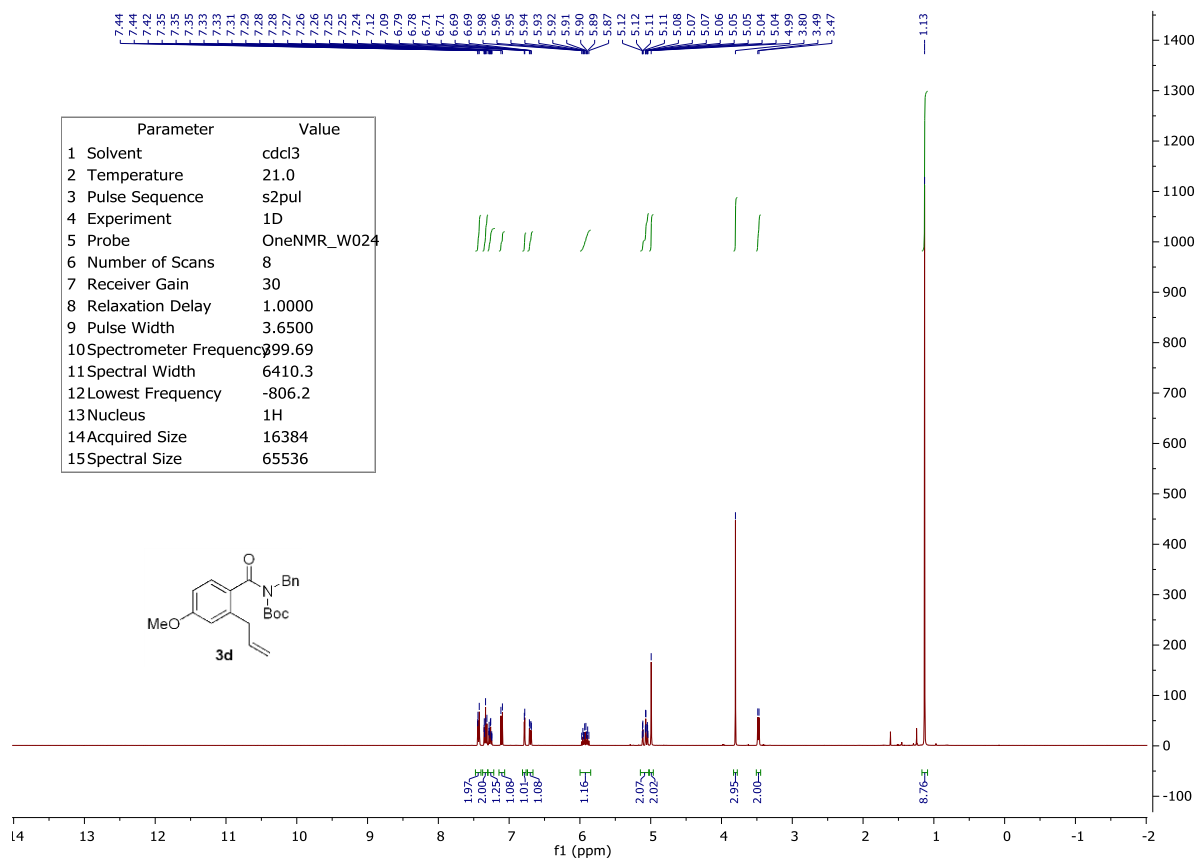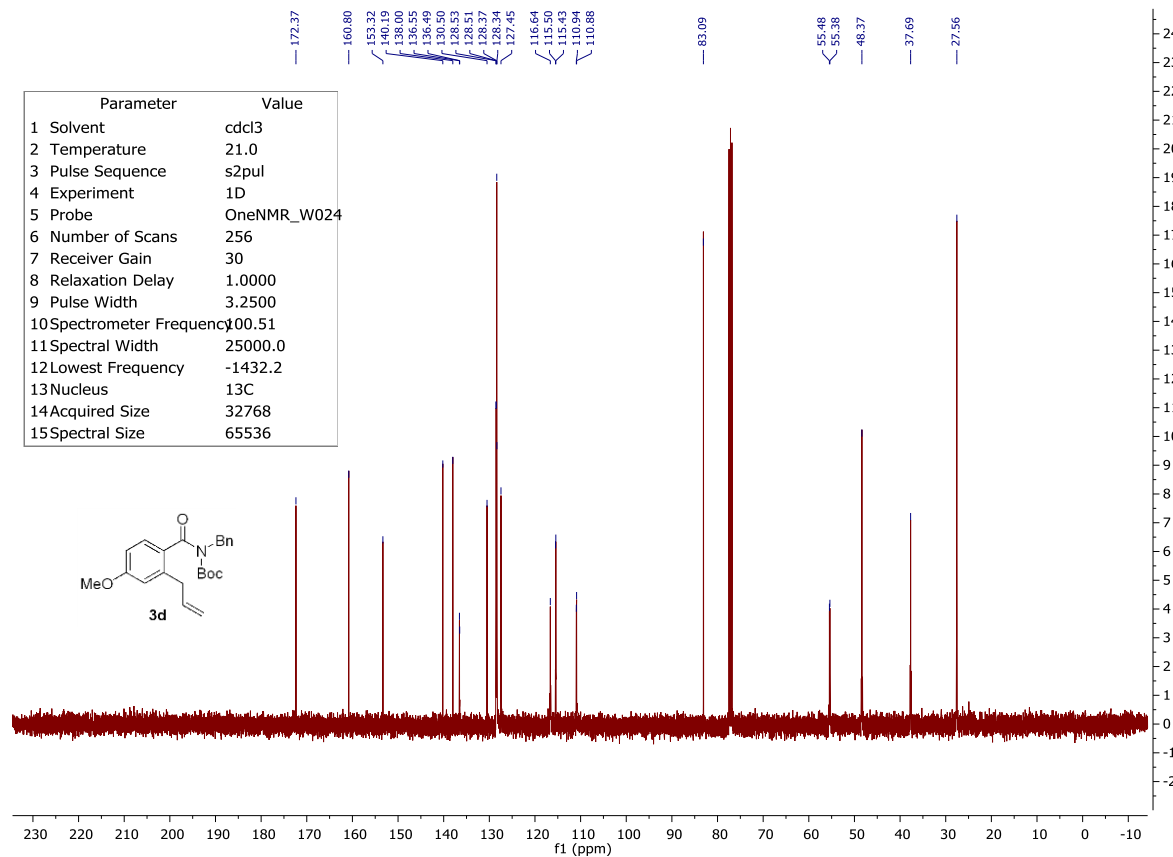

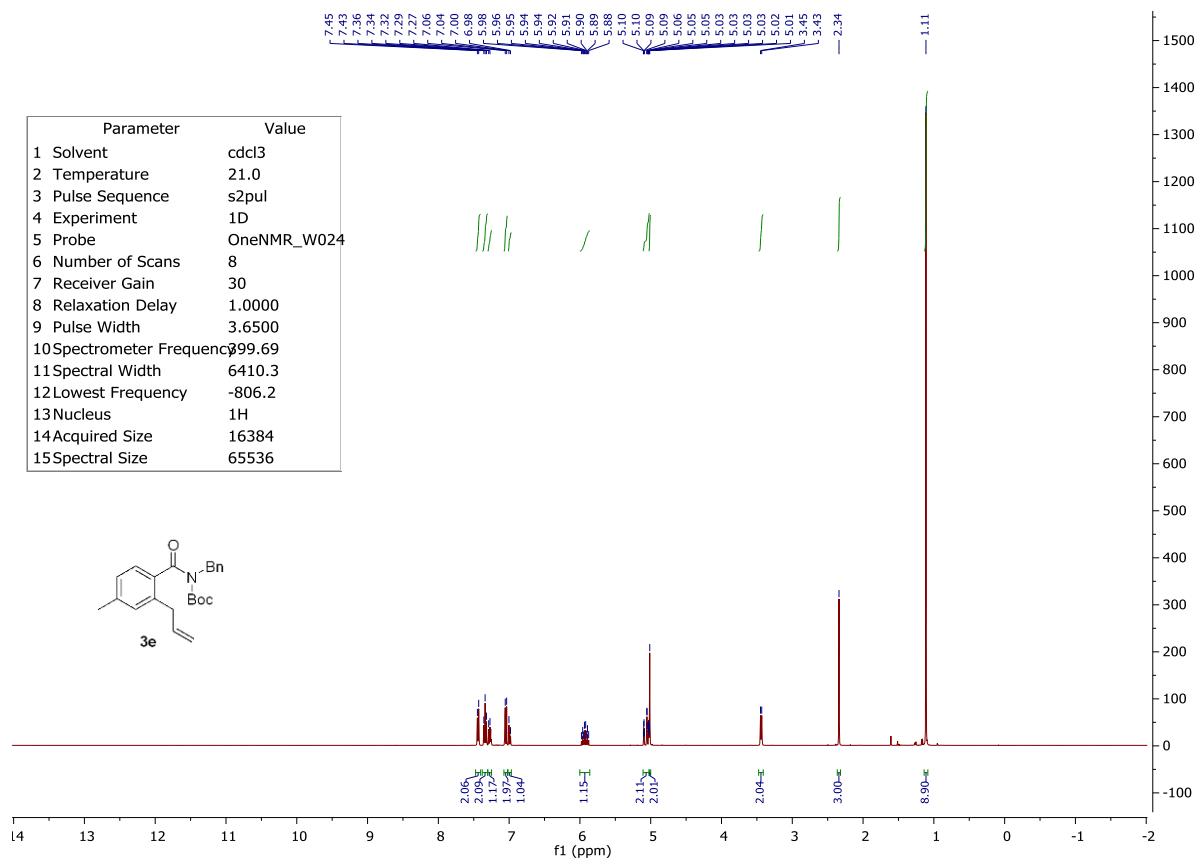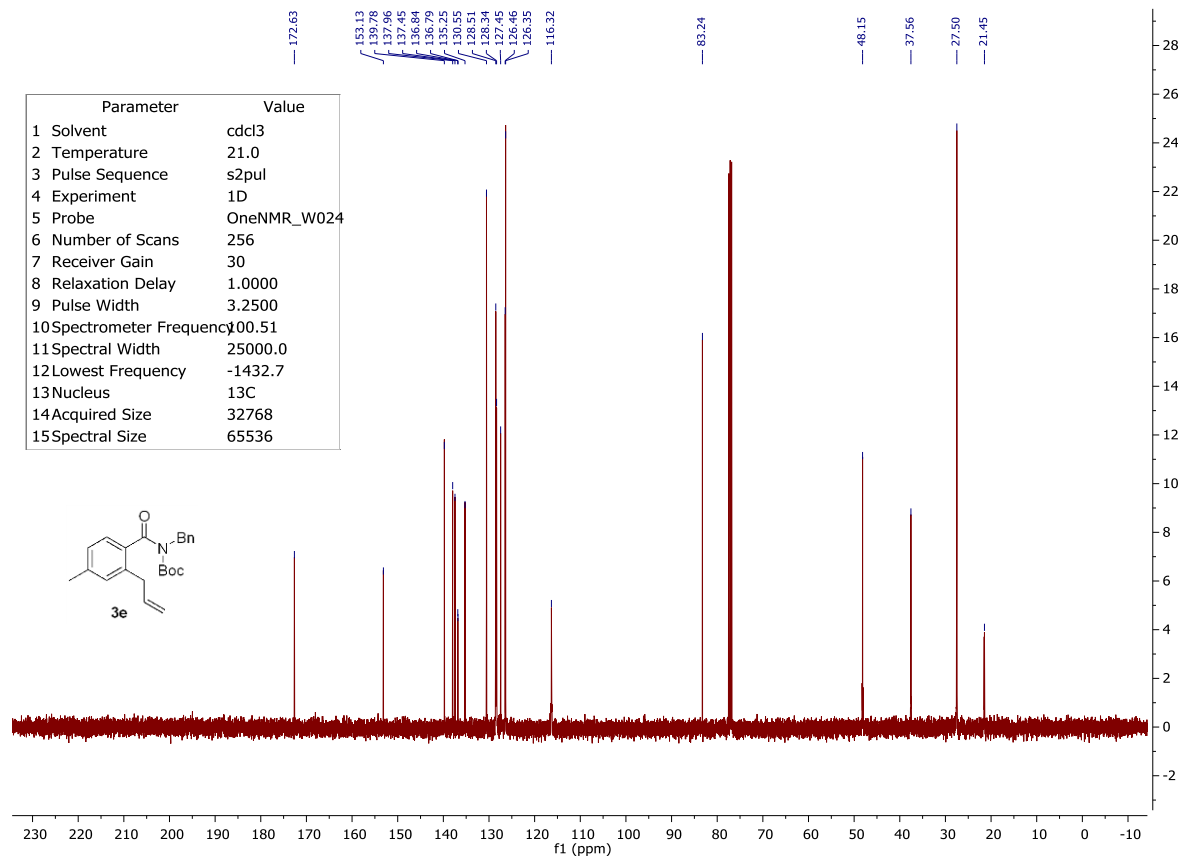

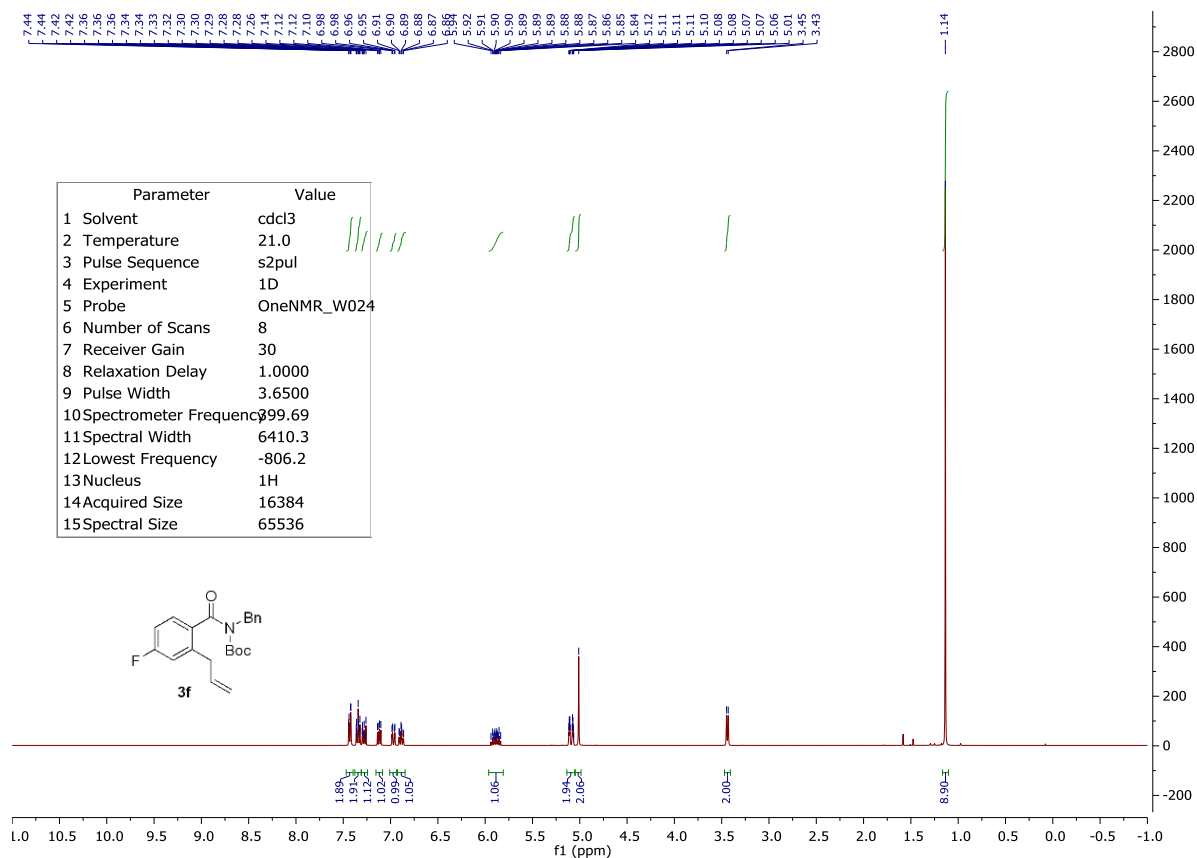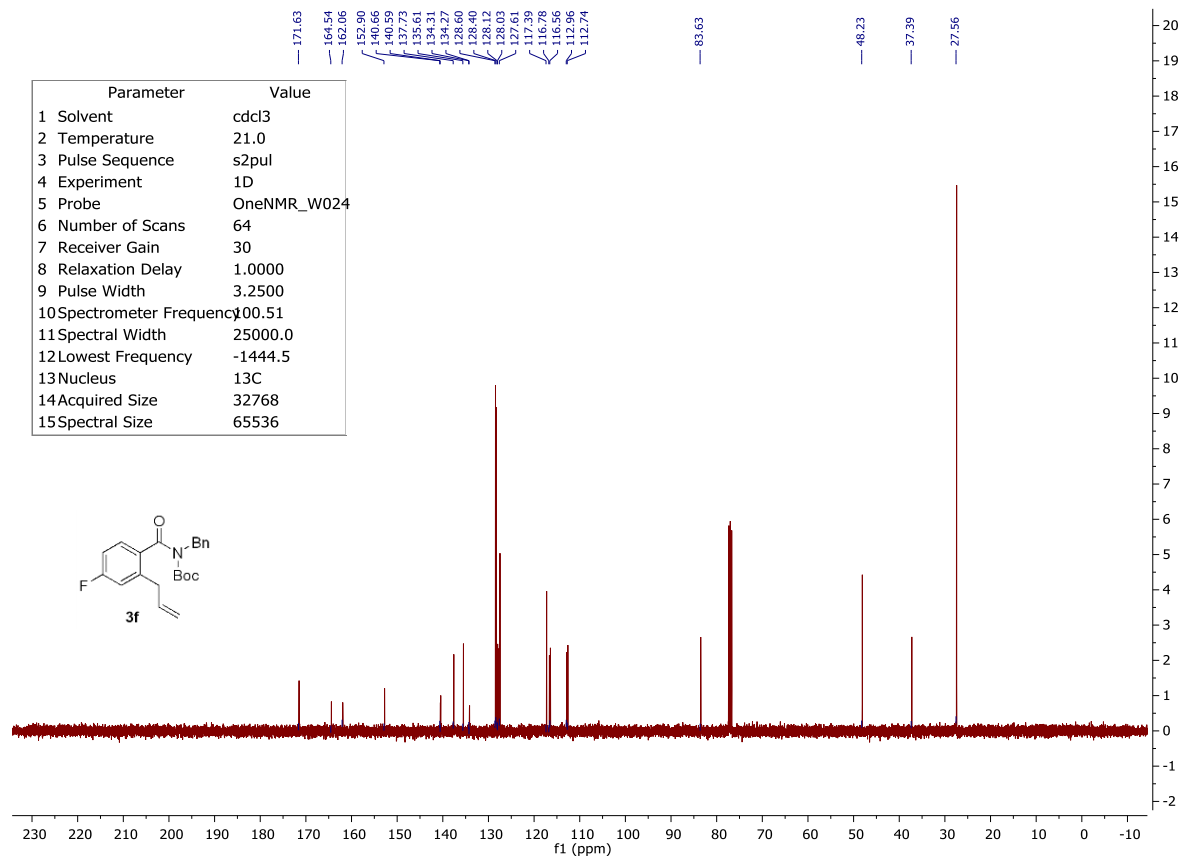

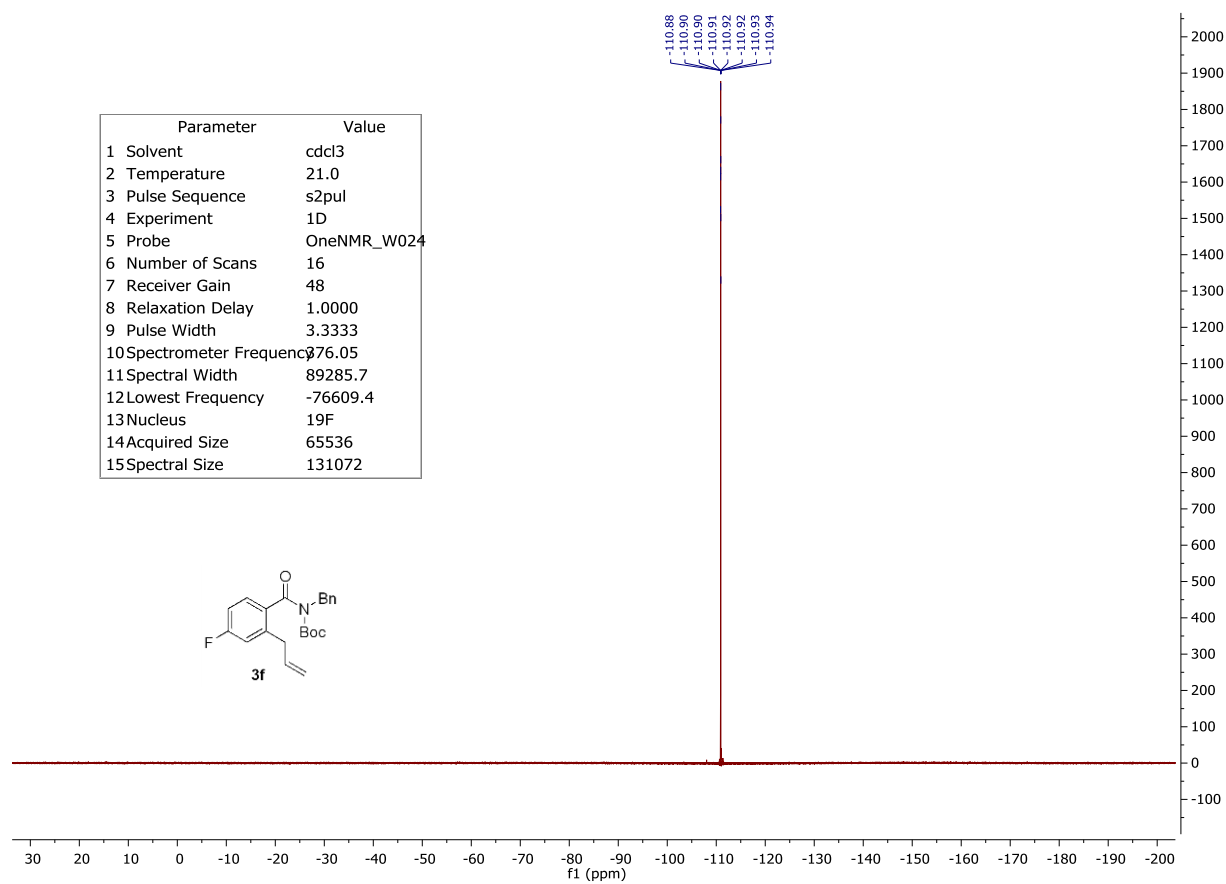

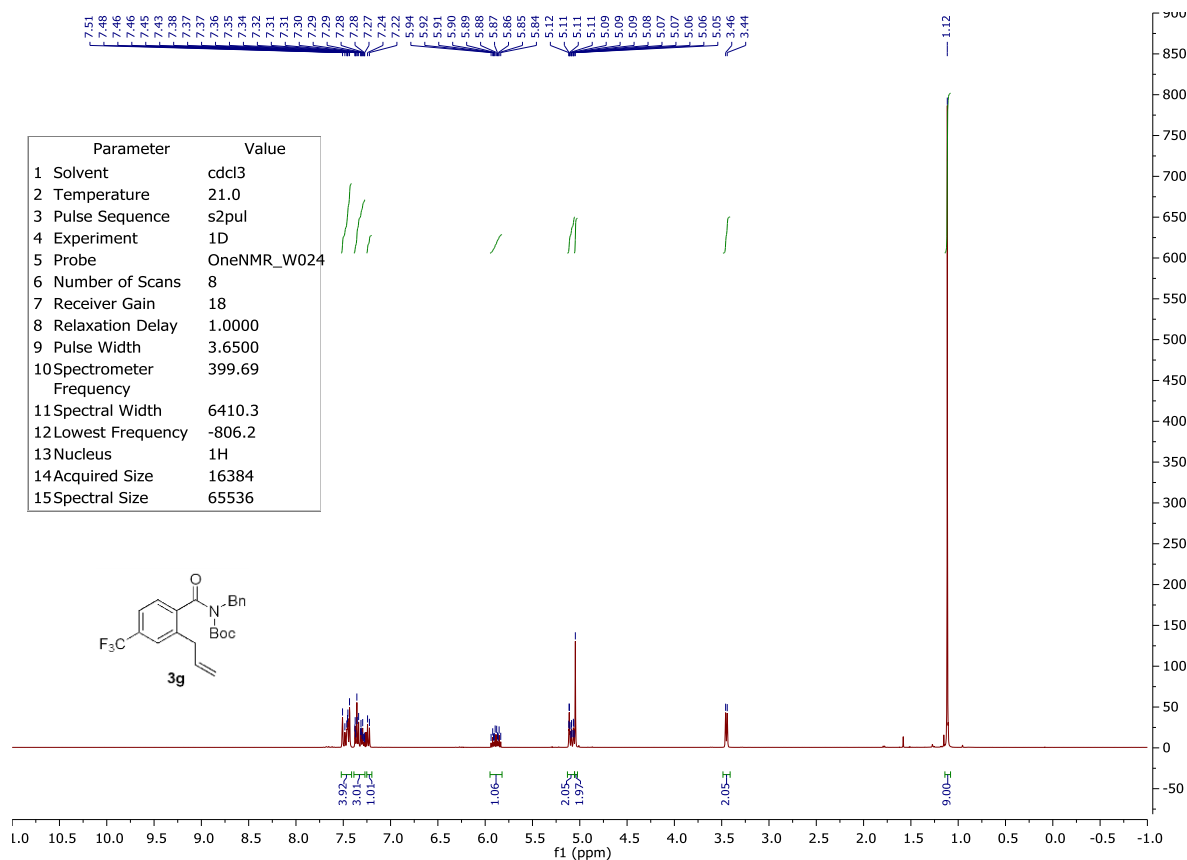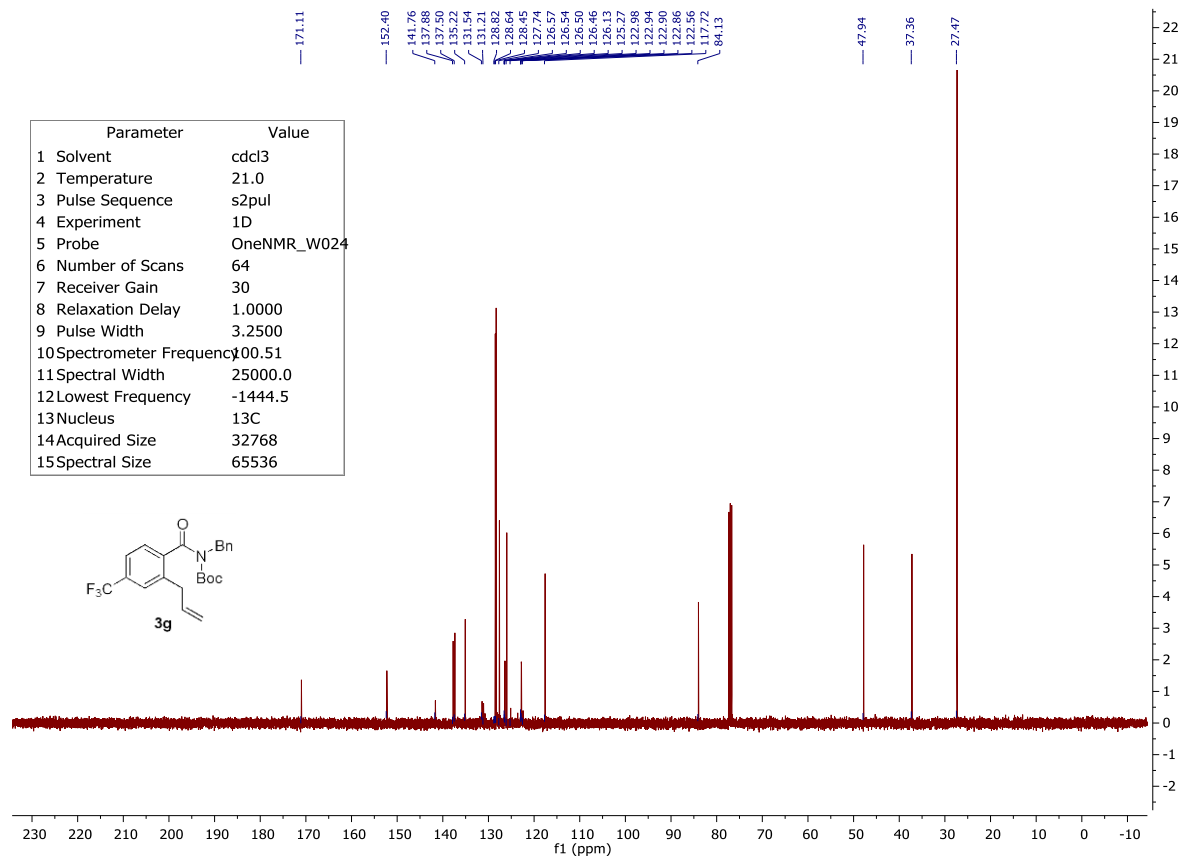

| Parameter                 | Value       |
|---------------------------|-------------|
| 1 Solvent                 | cdcl3       |
| 2 Temperature             | 21.0        |
| 3 Pulse Sequence          | s2pul       |
| 4 Experiment              | 1D          |
| 5 Probe                   | OneNMR_W024 |
| 6 Number of Scans         | 16          |
| 7 Receiver Gain           | 48          |
| 8 Relaxation Delay        | 1.0000      |
| 9 Pulse Width             | 3.3333      |
| 10 Spectrometer Frequency | 376.05      |
| 11 Spectral Width         | 89285.7     |
| 12 Lowest Frequency       | -76609.4    |
| 13 Nucleus                | 19F         |
| 14 Acquired Size          | 65536       |
| 15 Spectral Size          | 131072      |

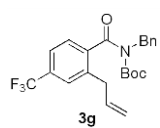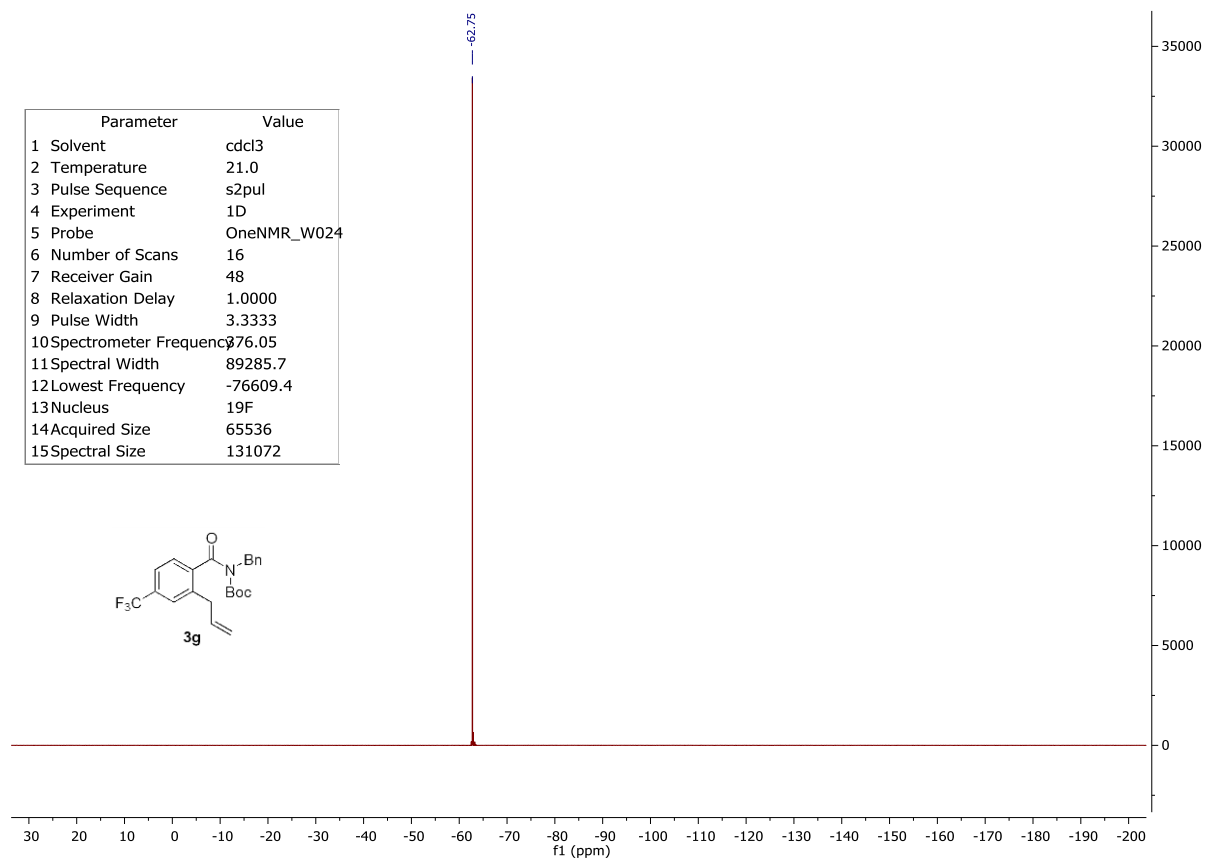

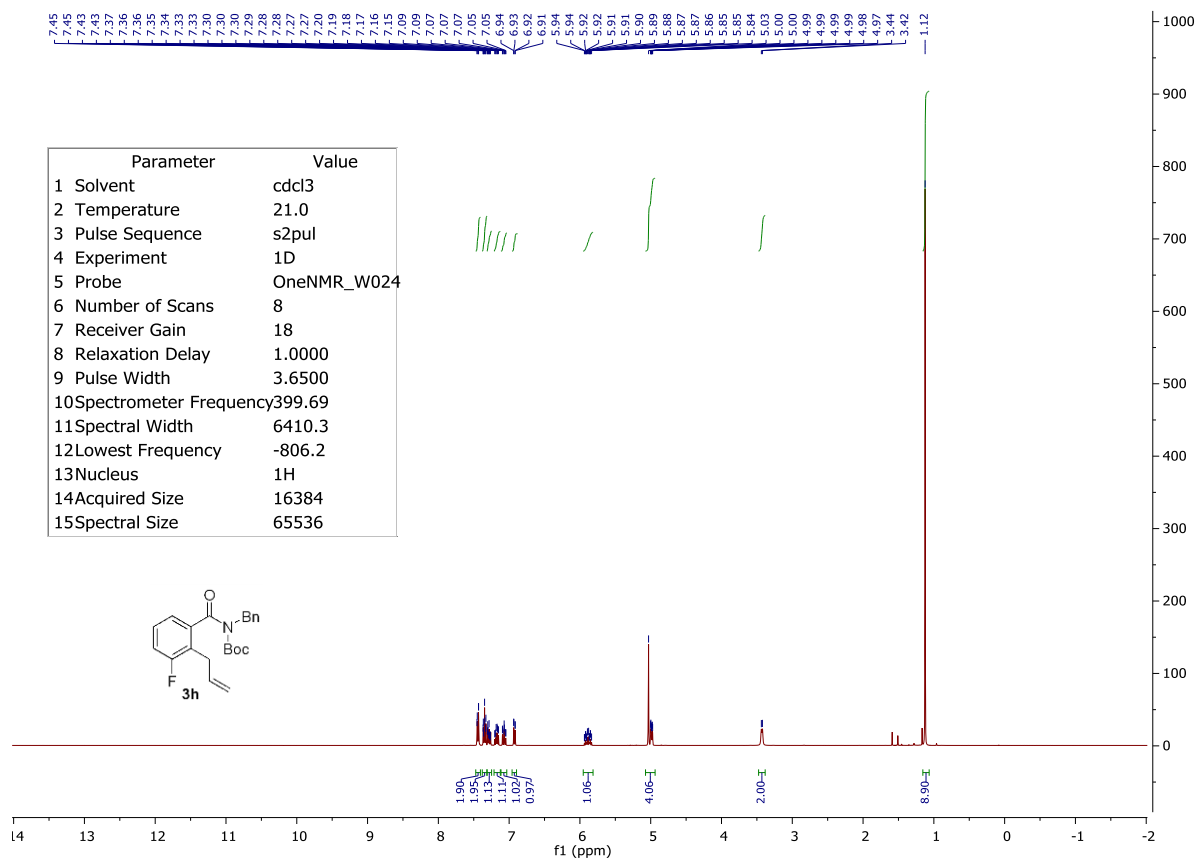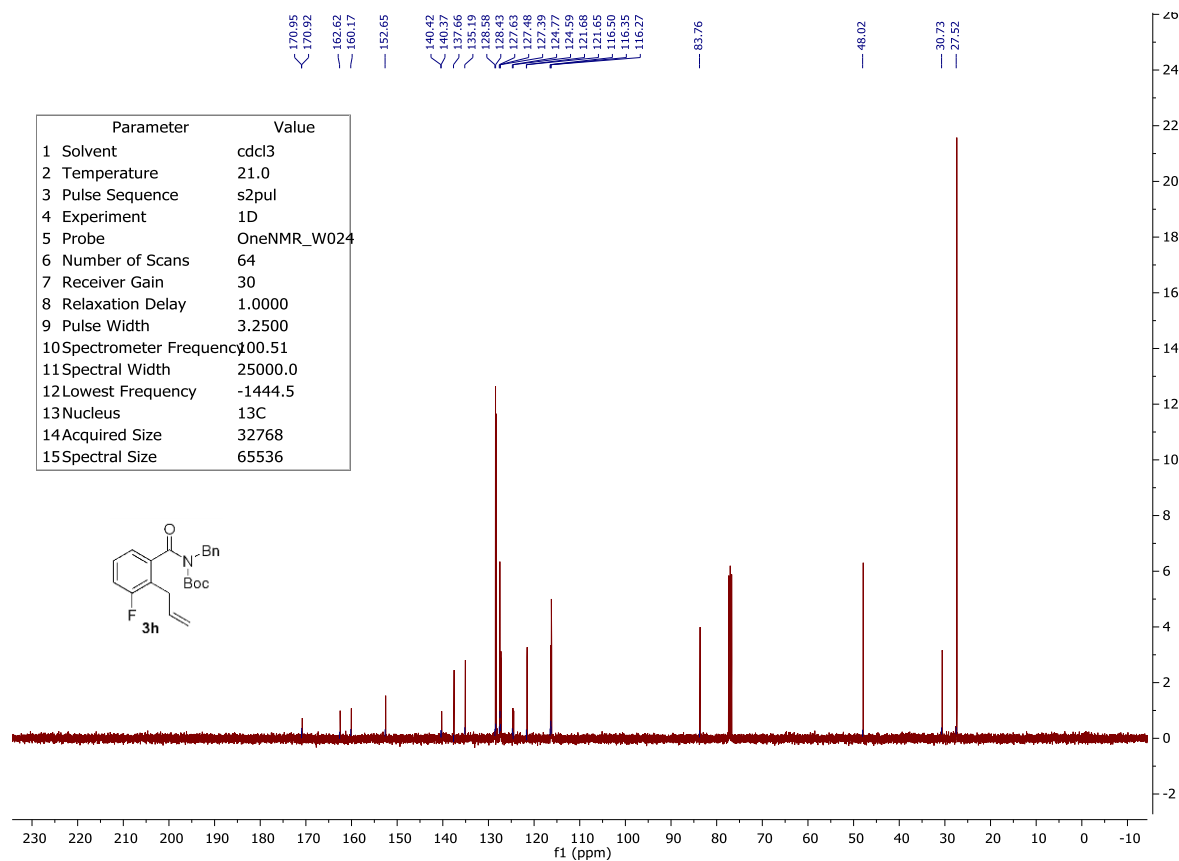

| Parameter                 | Value           |
|---------------------------|-----------------|
| 1 Solvent                 | cdcl3           |
| 2 Temperature             | 21.0            |
| 3 Pulse Sequence          | s2pul           |
| 4 Experiment              | 1D              |
| 5 Probe                   | OneNMR_W024     |
| 6 Number of Scans         | 16              |
| 7 Receiver Gain           | 56              |
| 8 Relaxation Delay        | 1.0000          |
| 9 Pulse Width             | 3.3333          |
| 10 Spectrometer Frequency | 376.05          |
| 11 Spectral Width         | 89285.7         |
| 12 Lowest Frequency       | -76609.4        |
| 13 Nucleus                | <sup>19</sup> F |
| 14 Acquired Size          | 65536           |
| 15 Spectral Size          | 131072          |

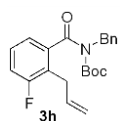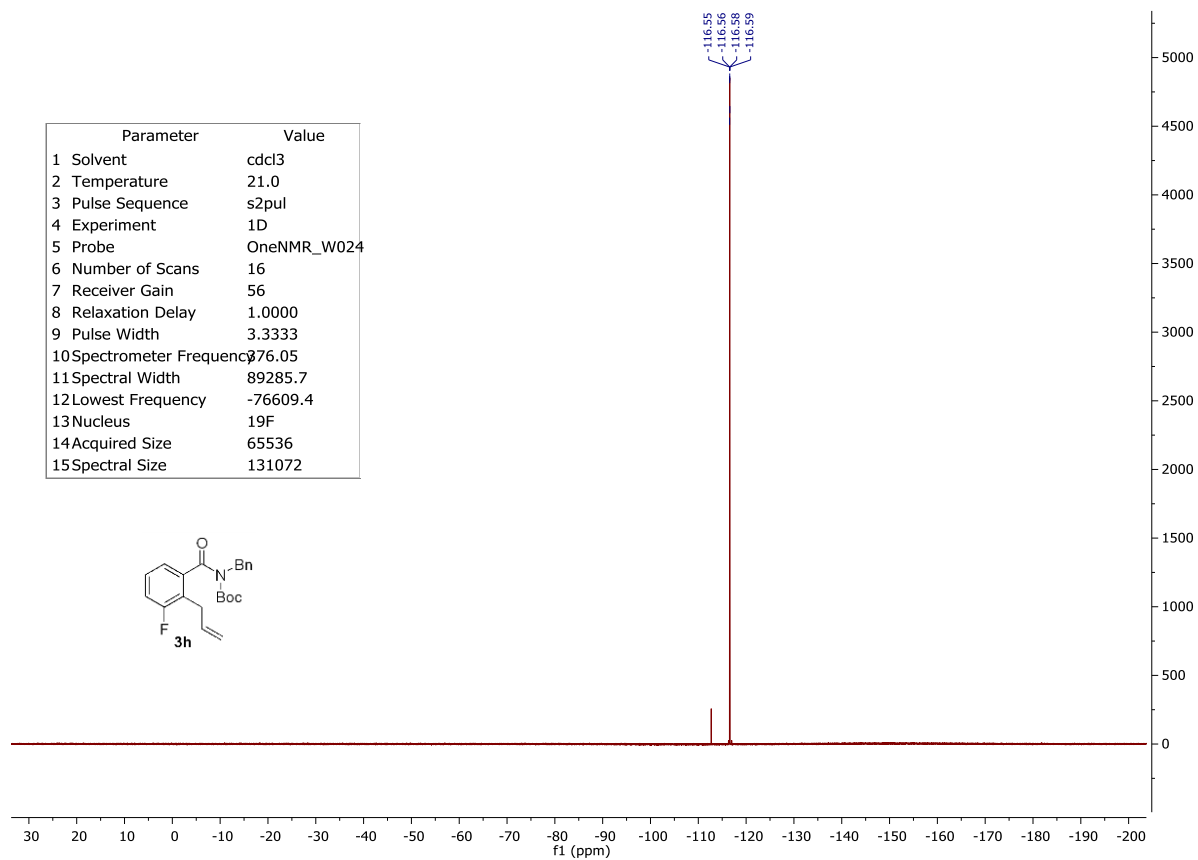



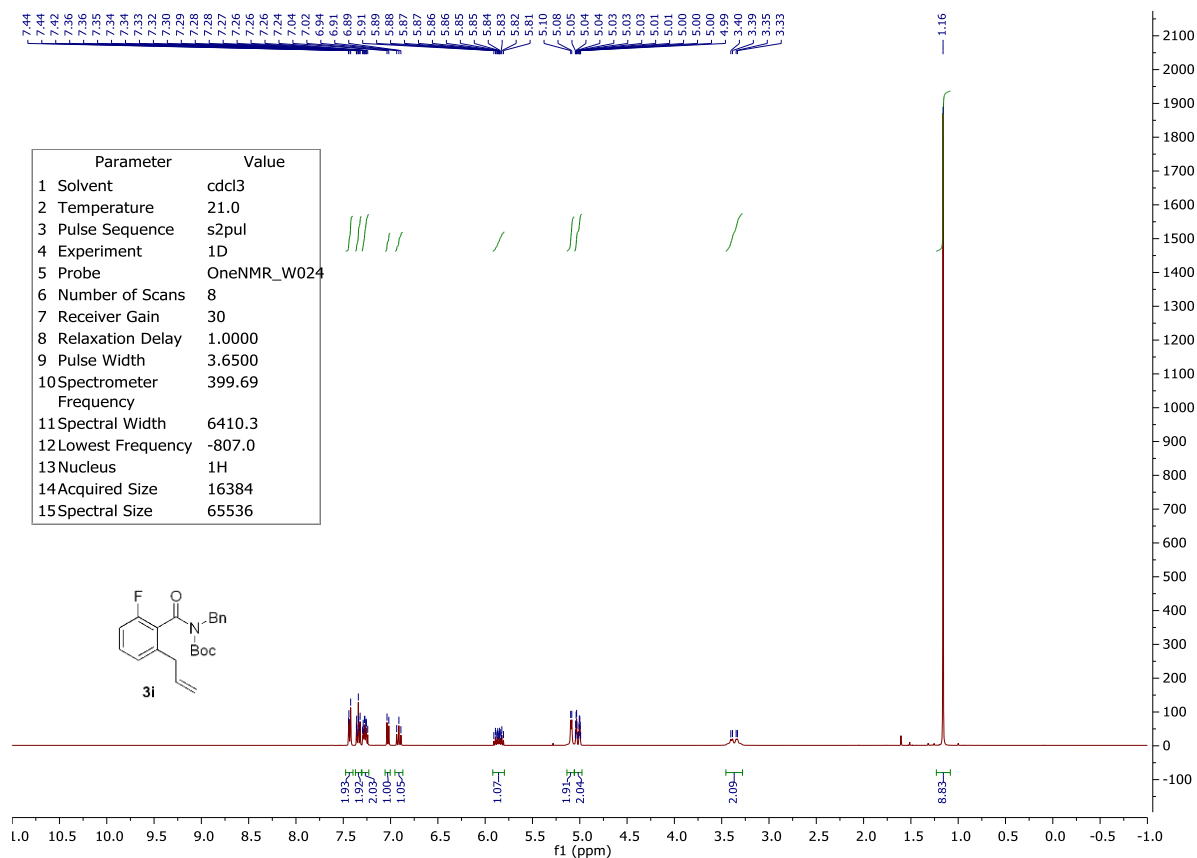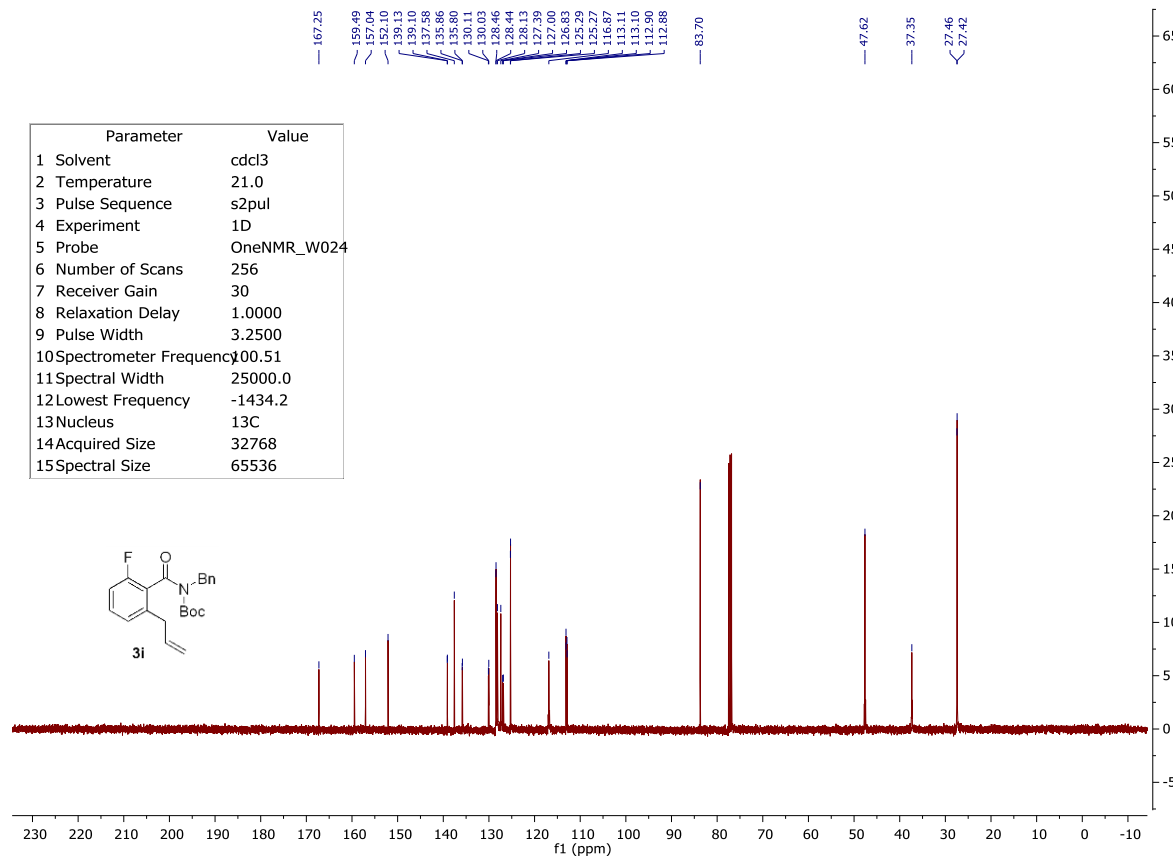

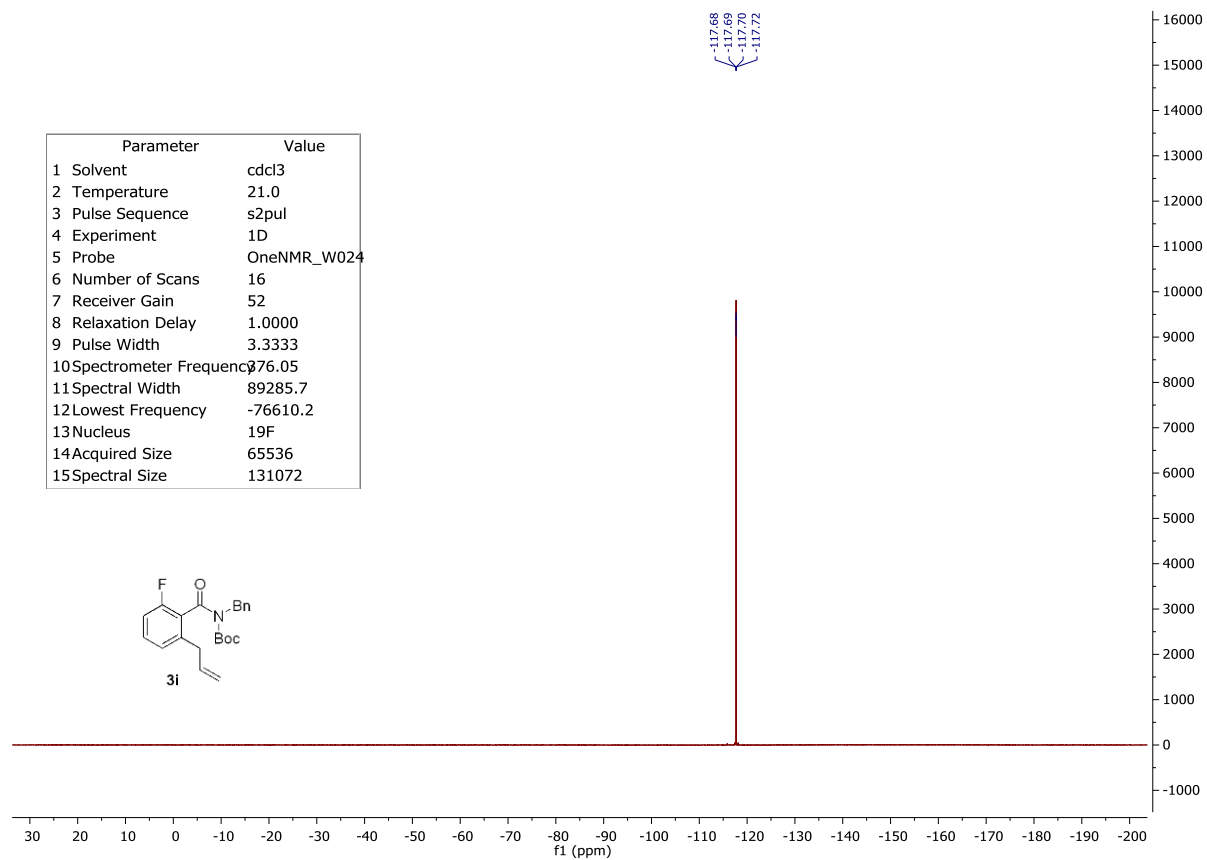

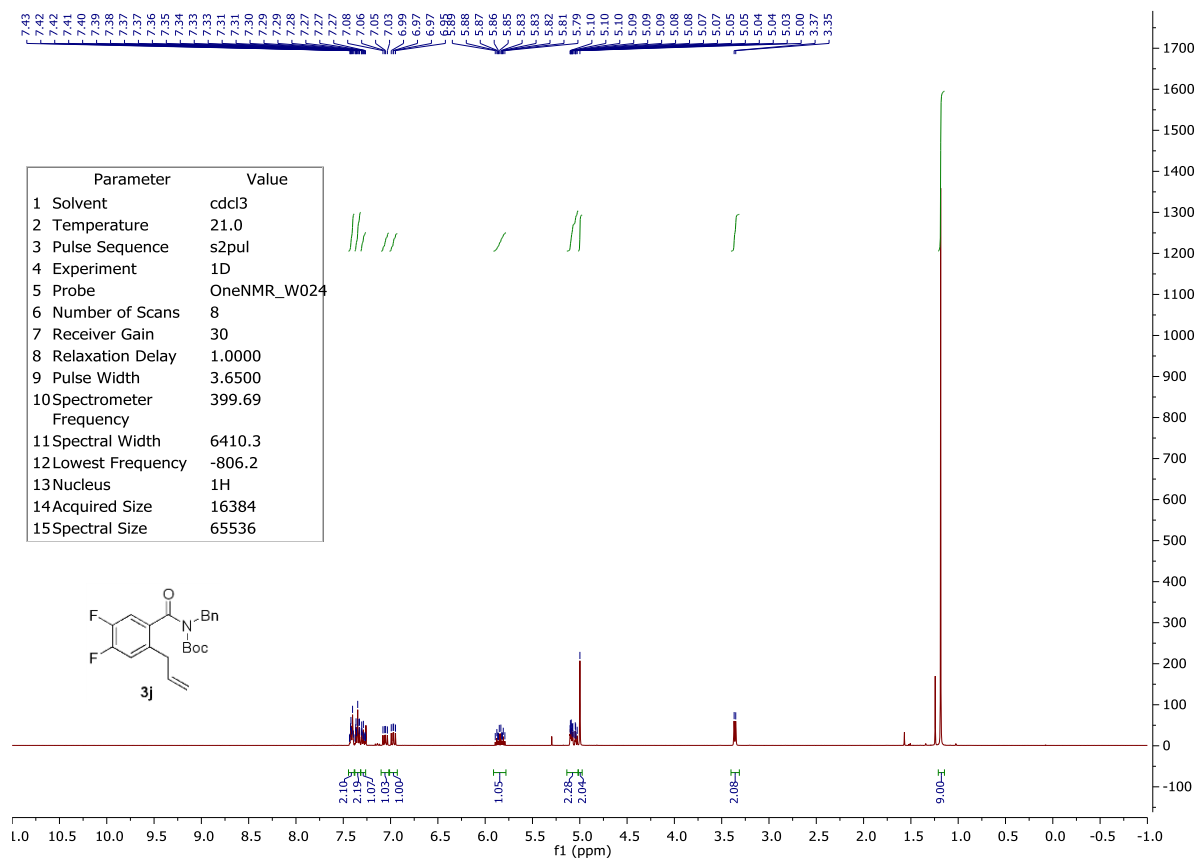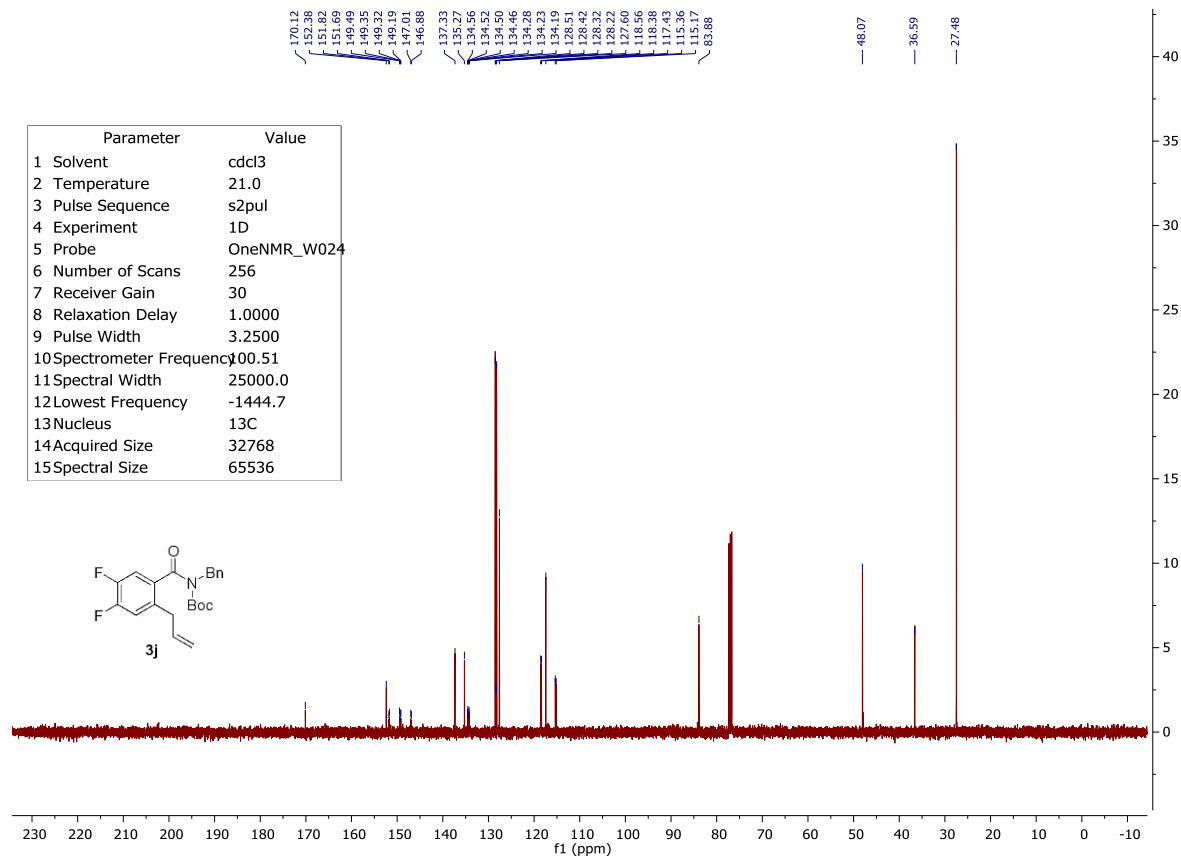

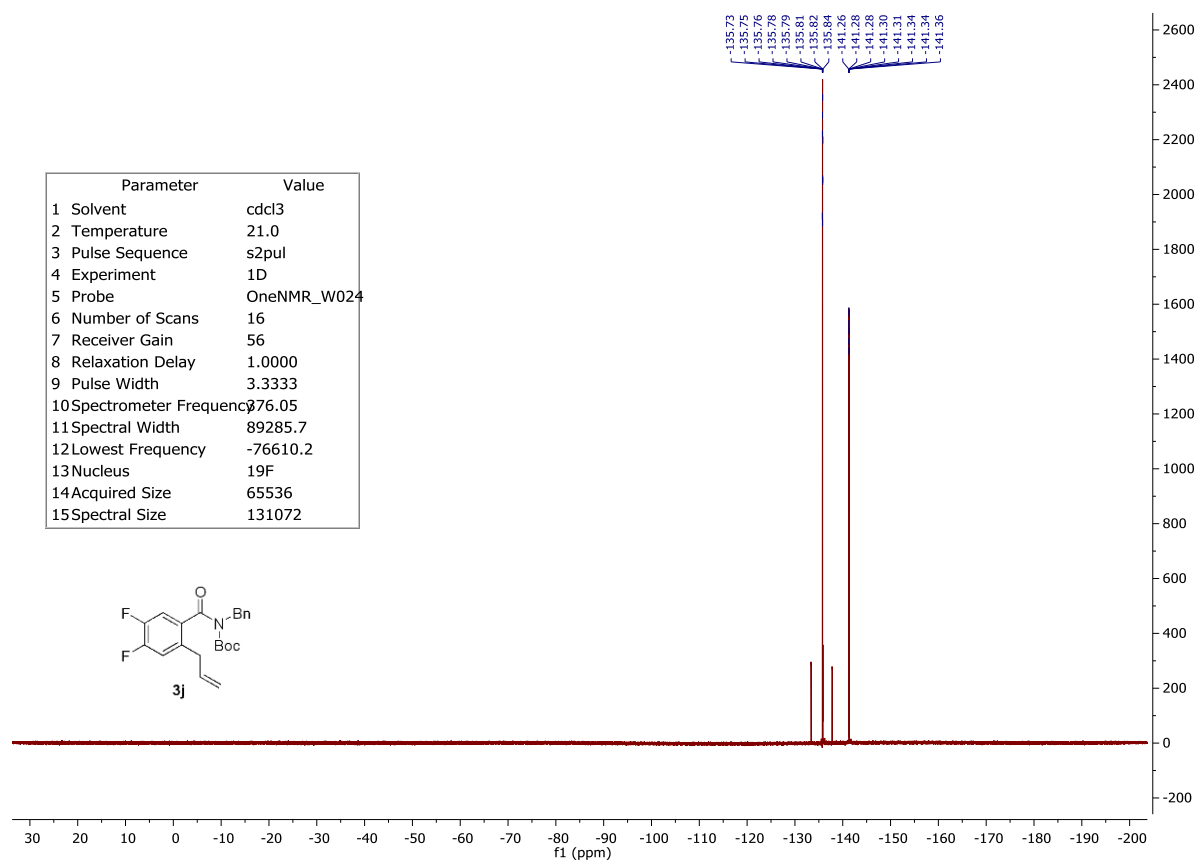

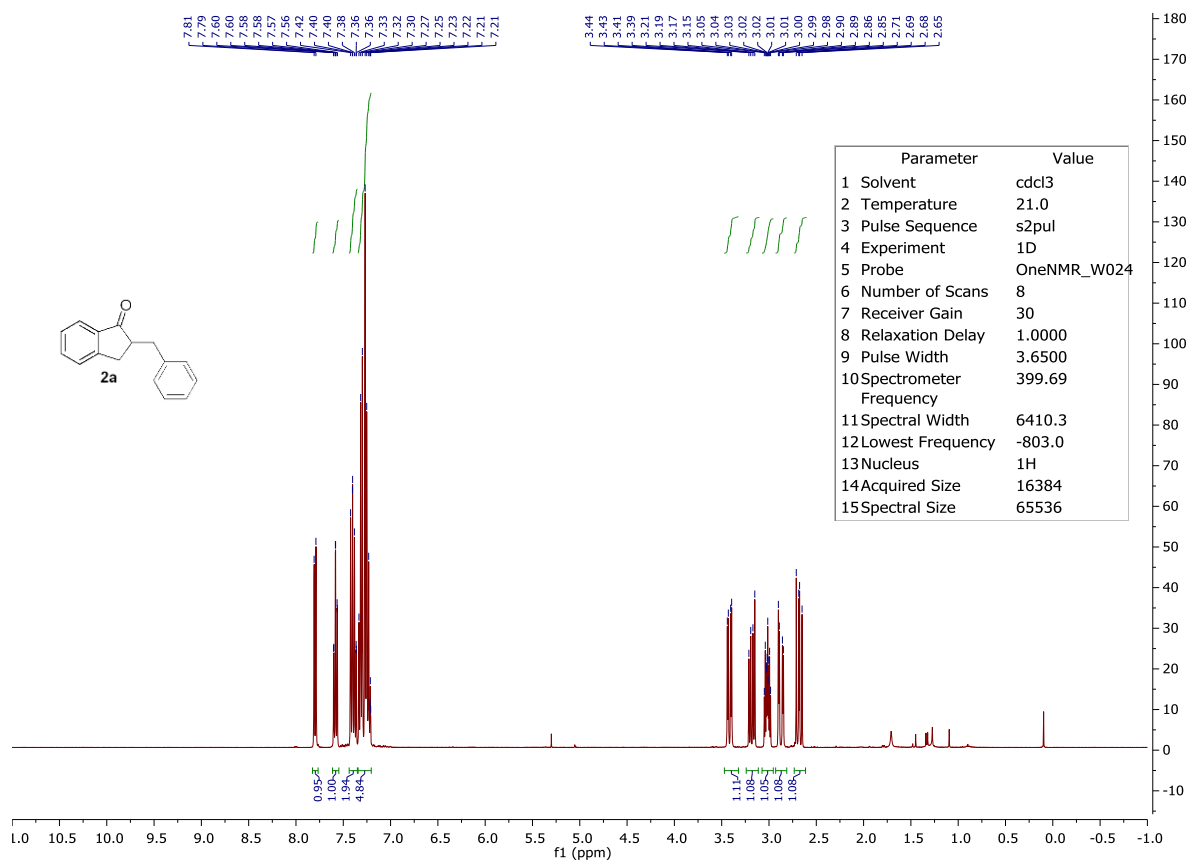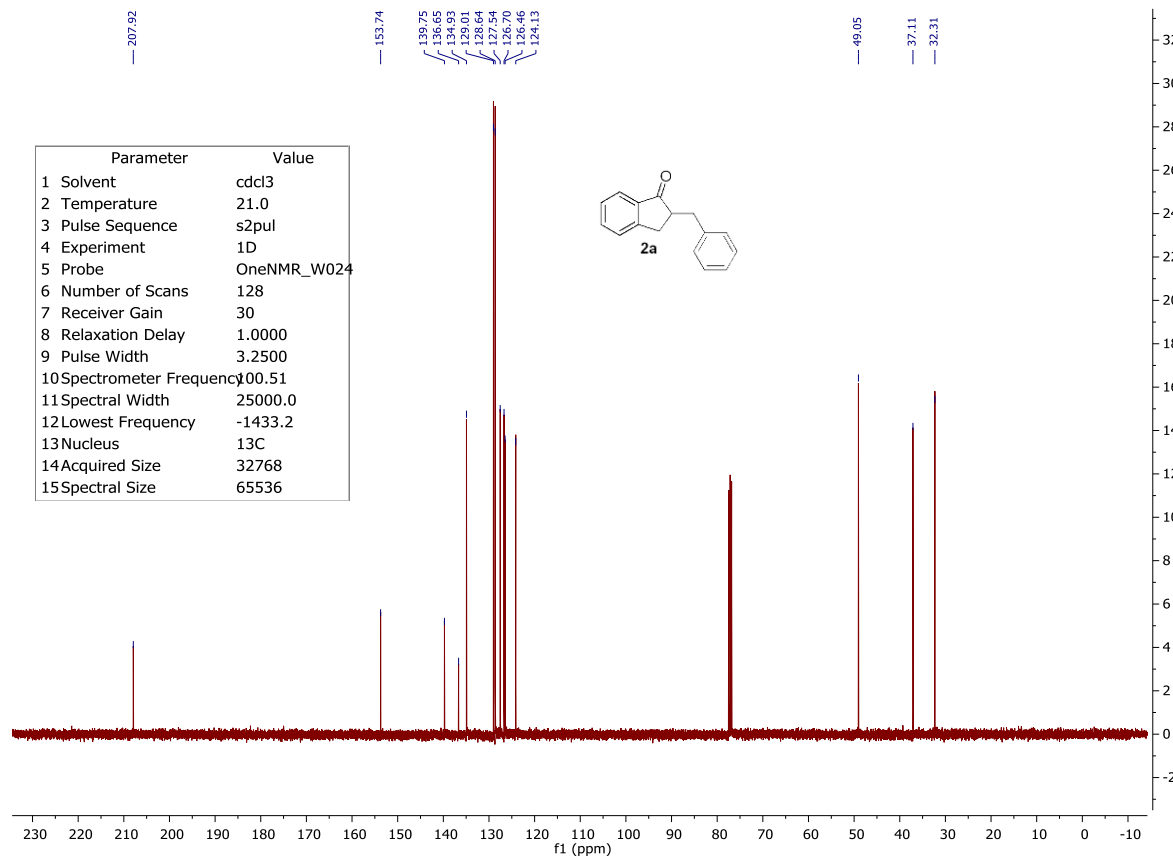

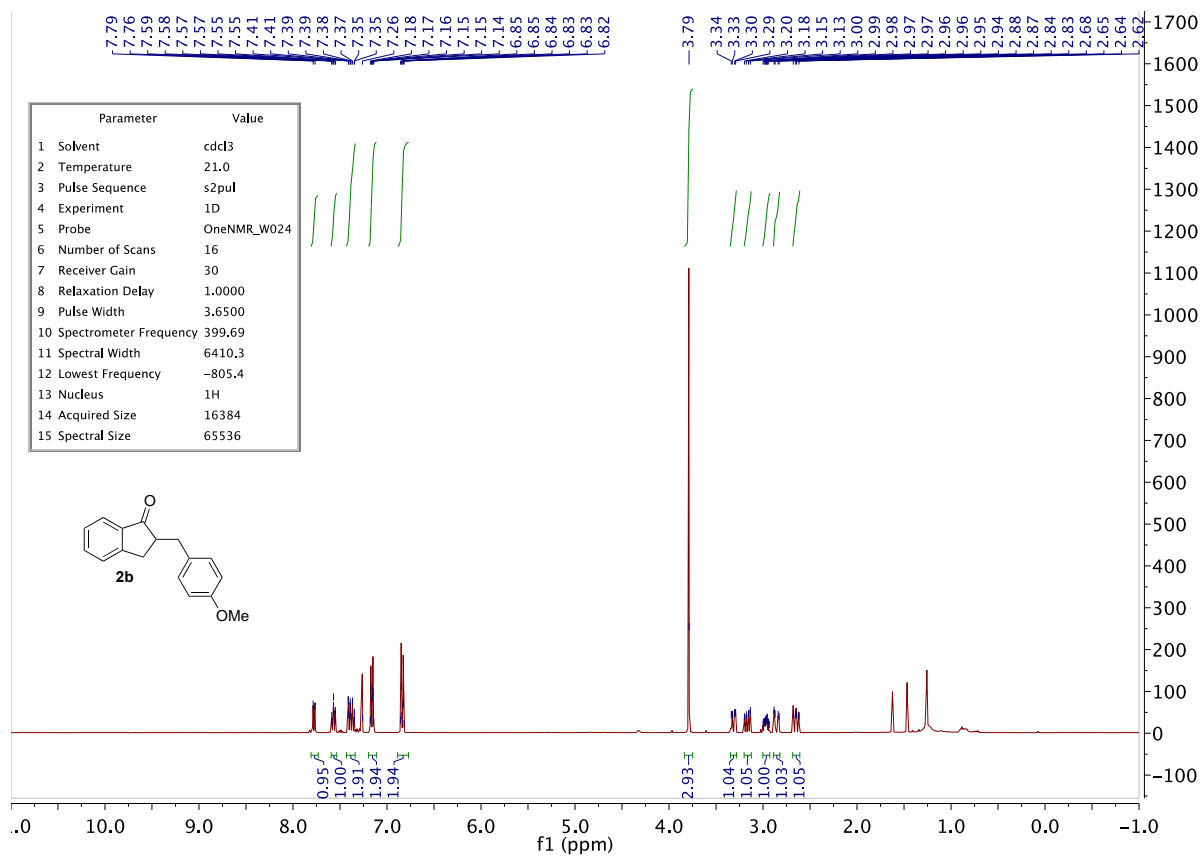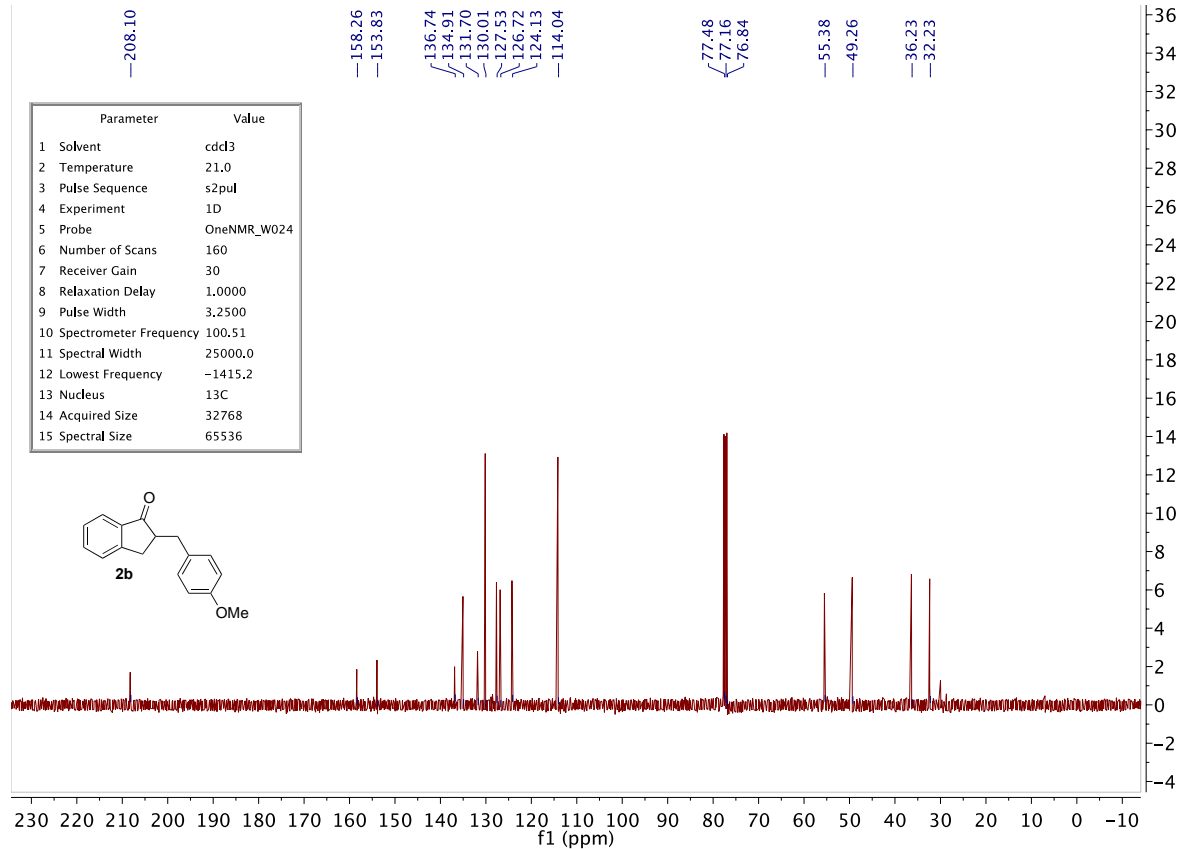

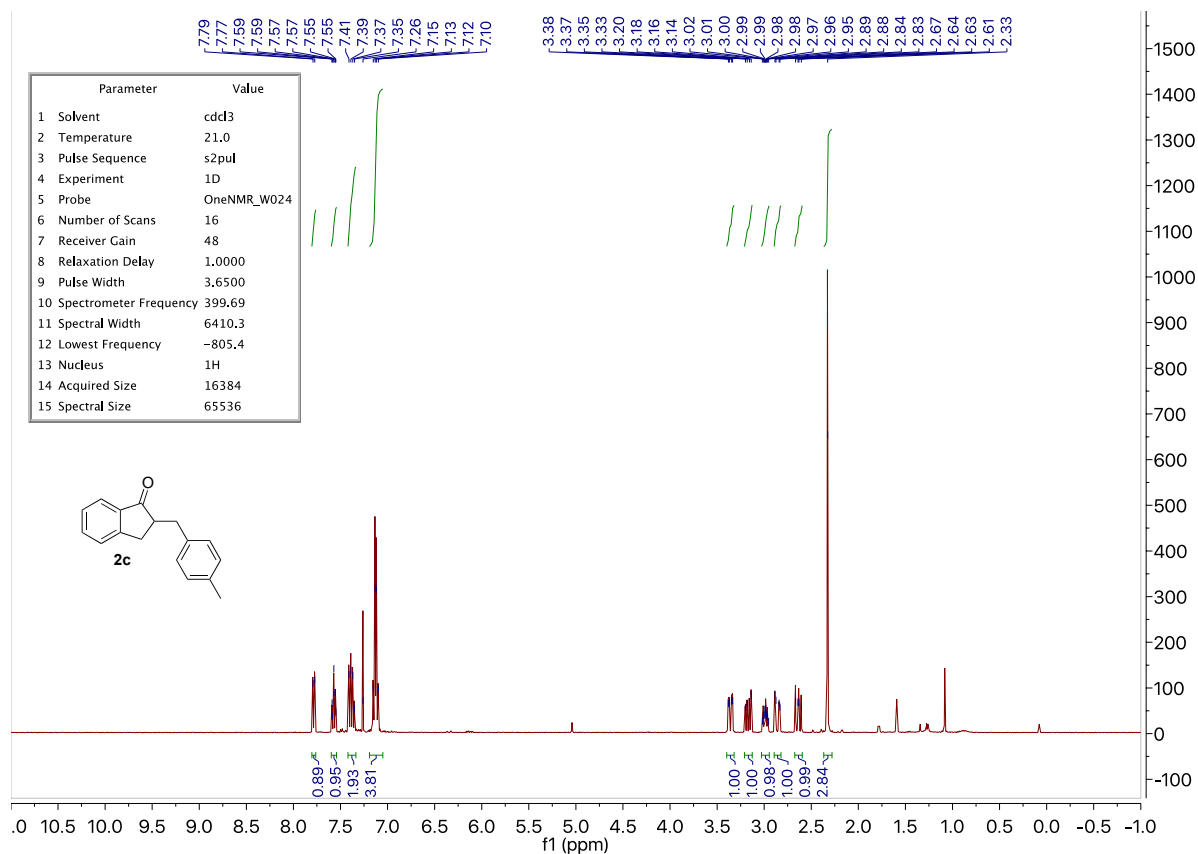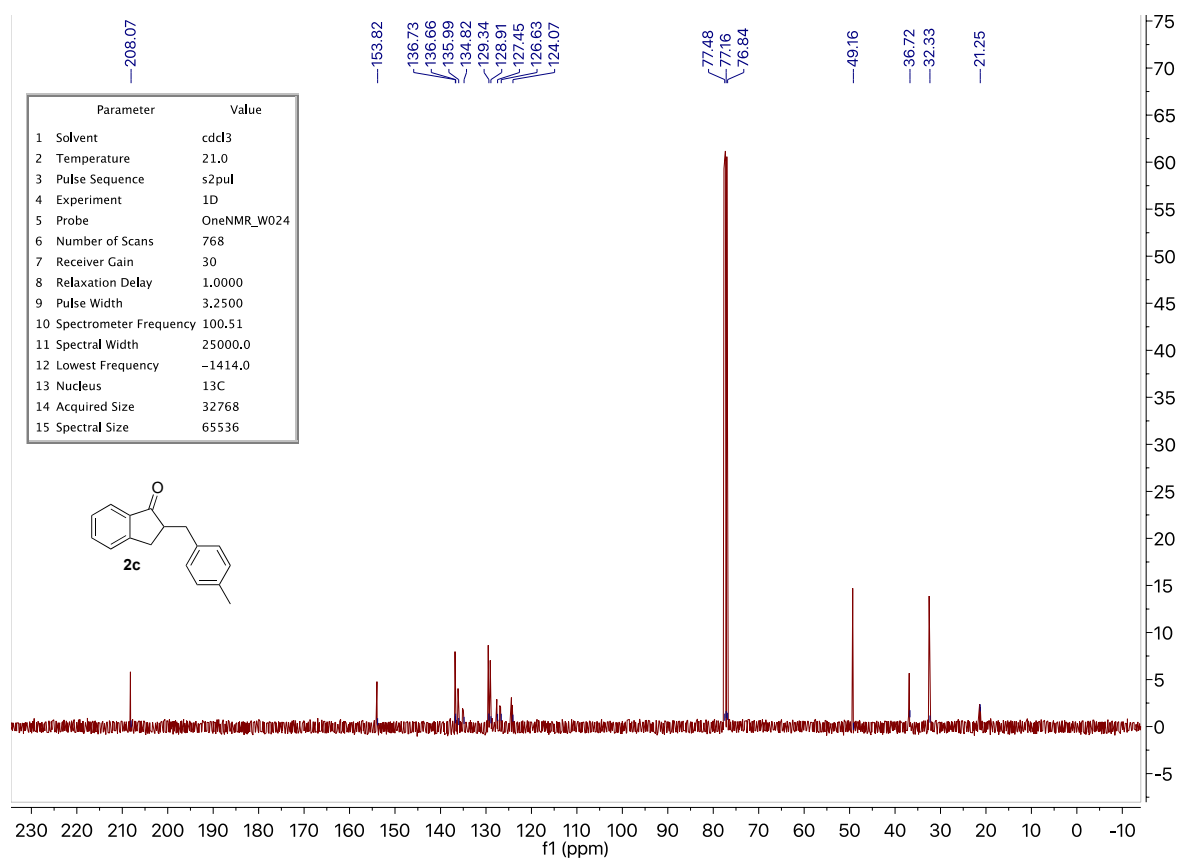

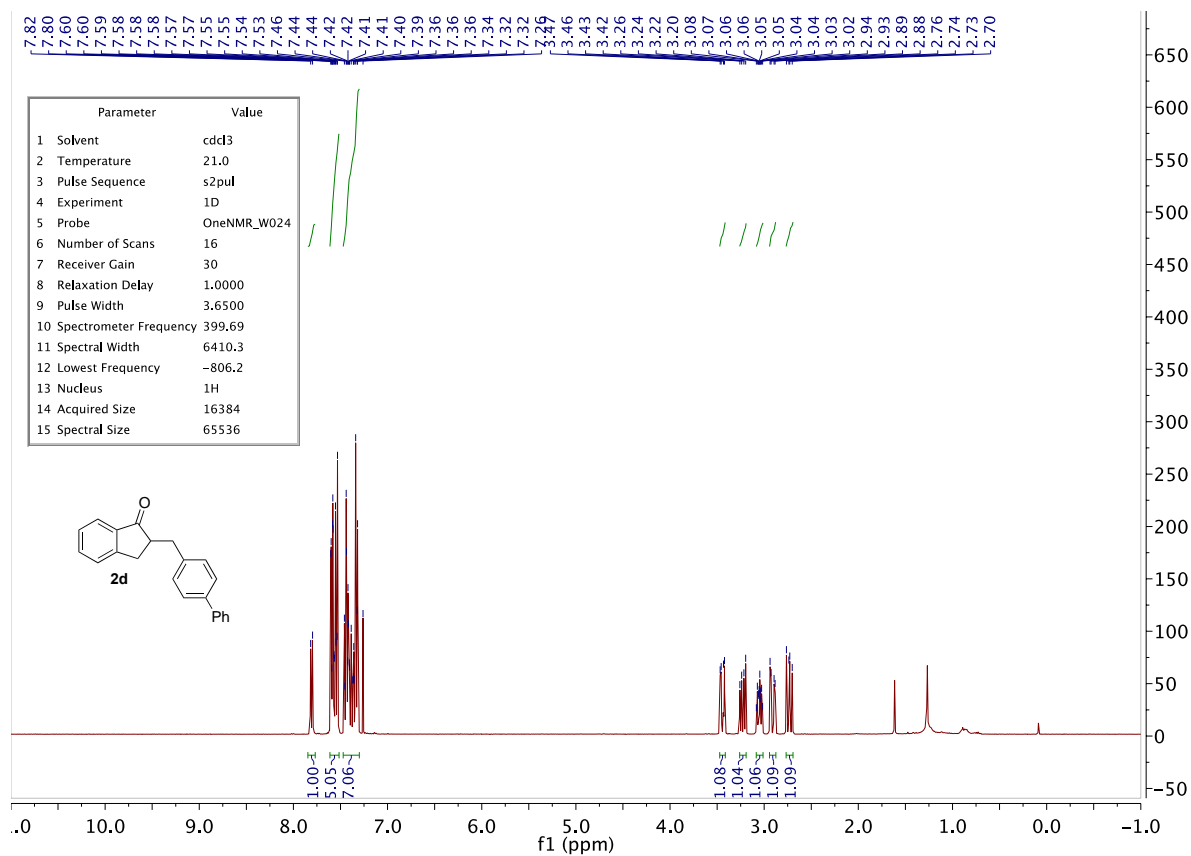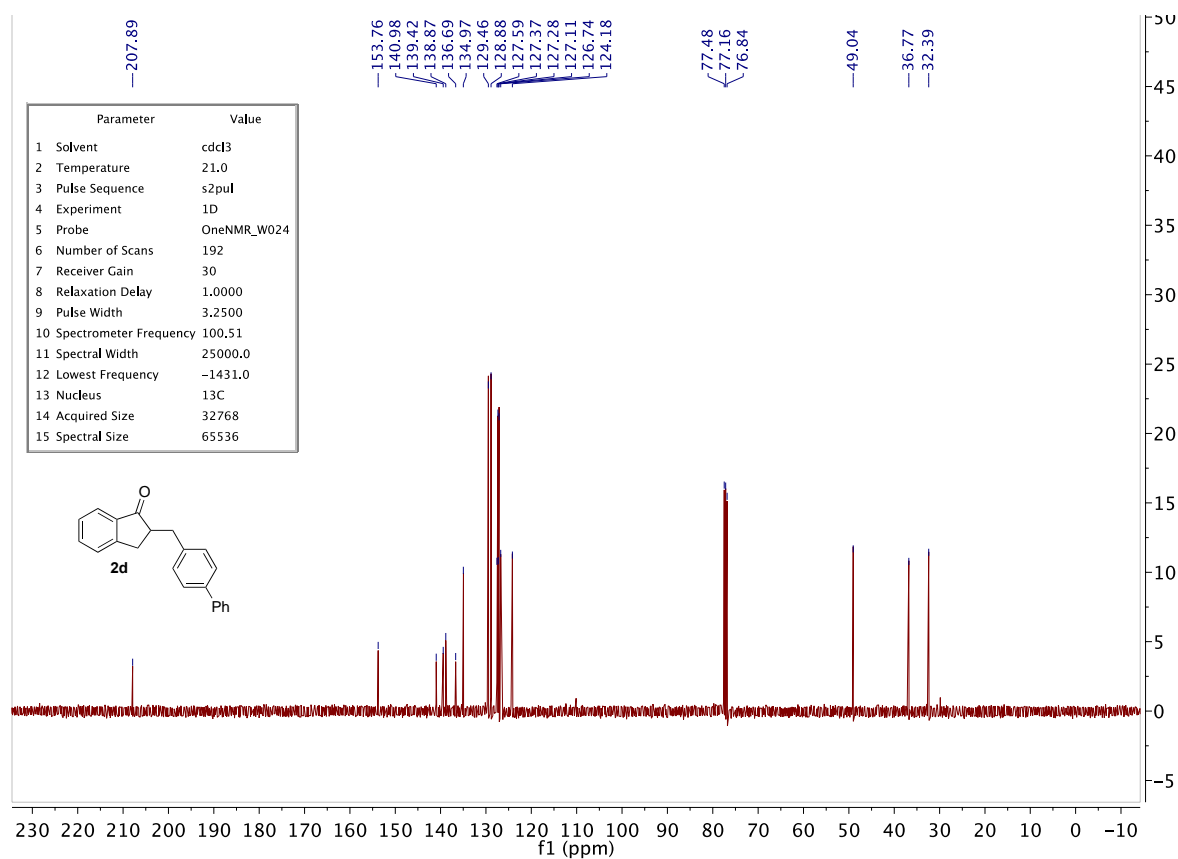



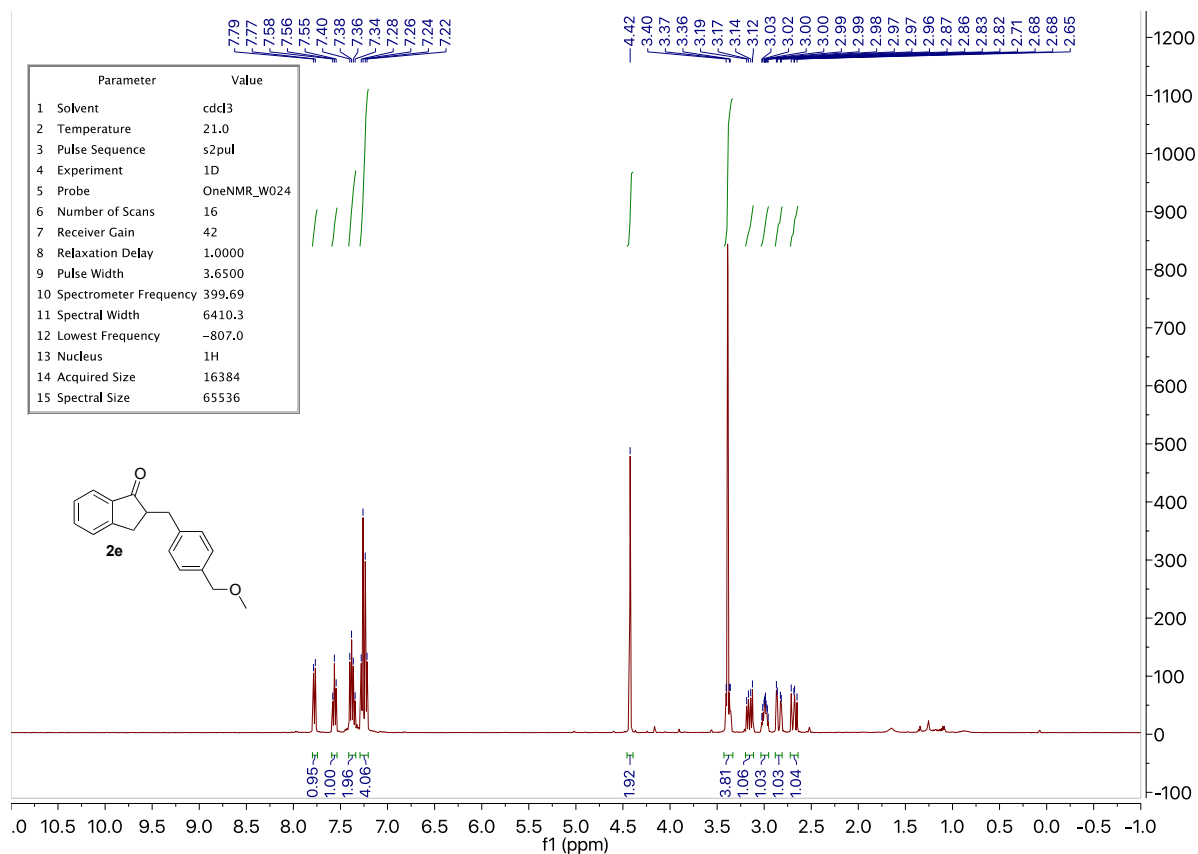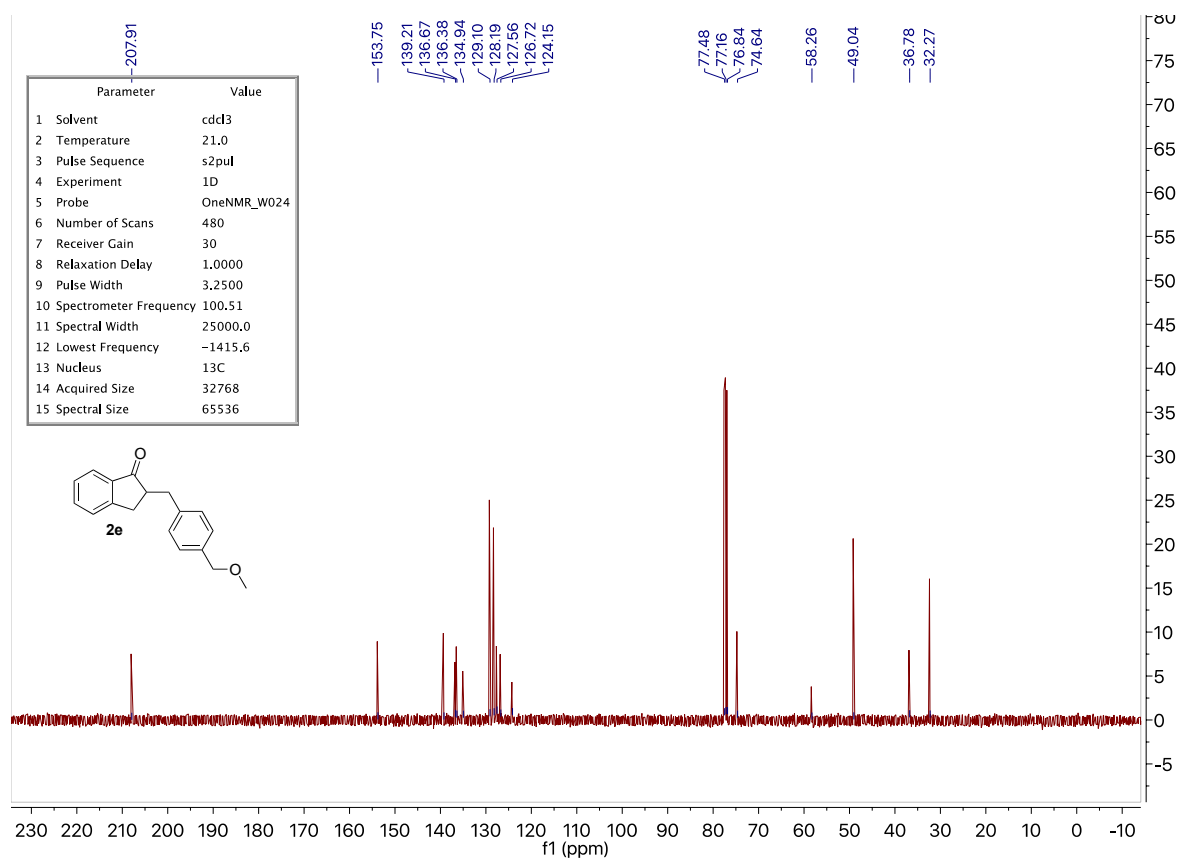

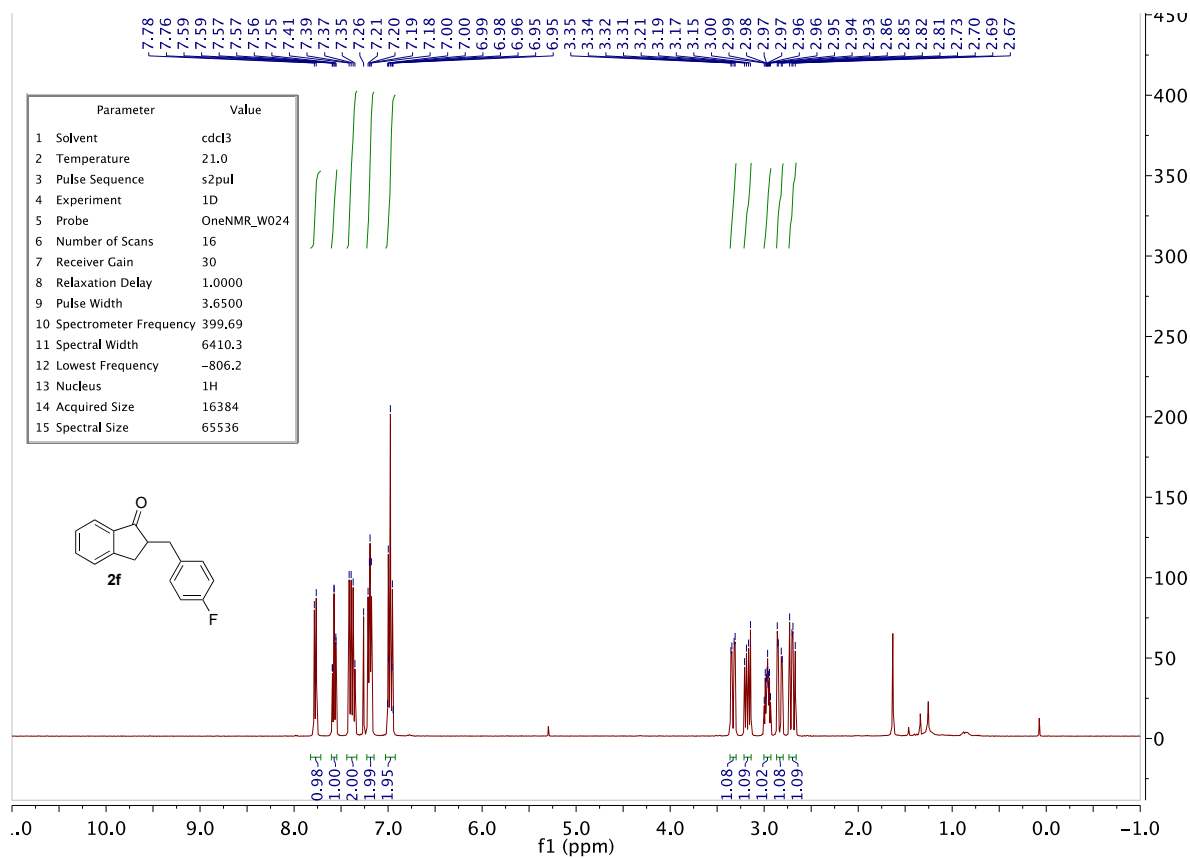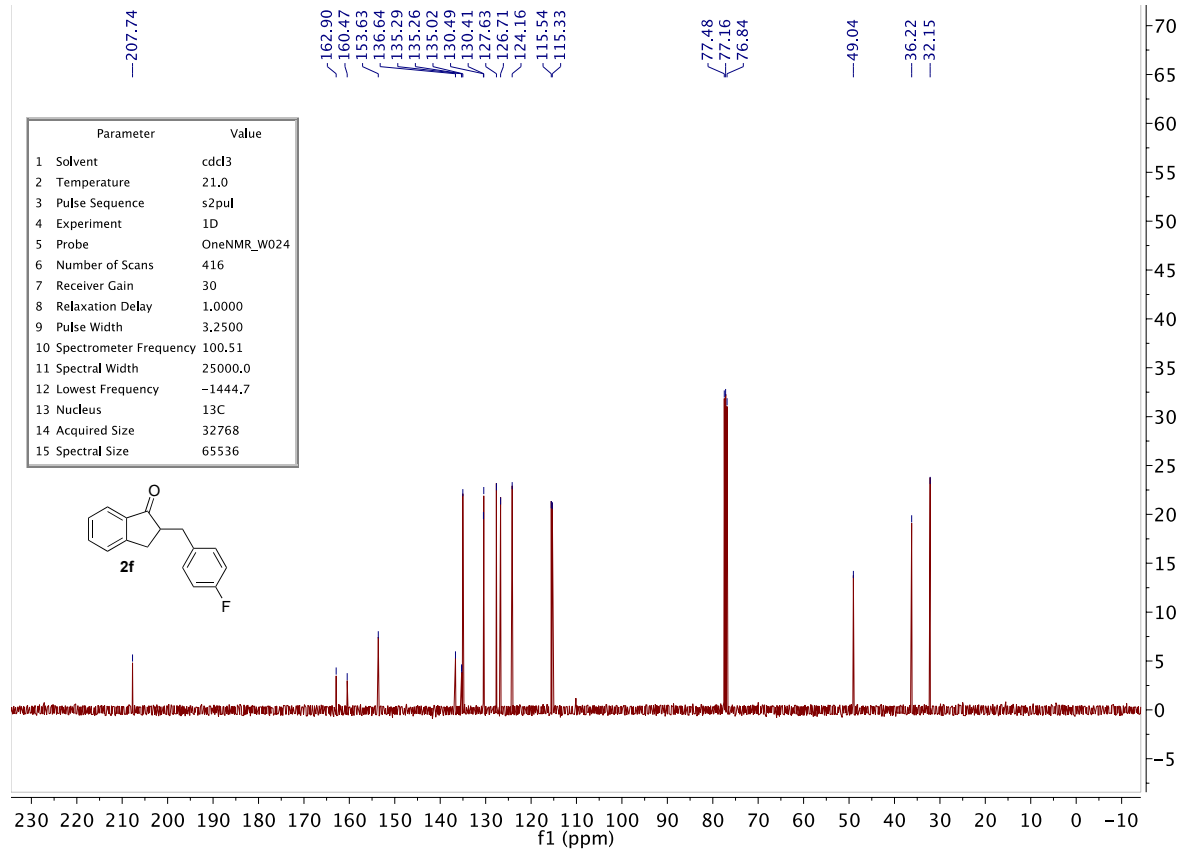

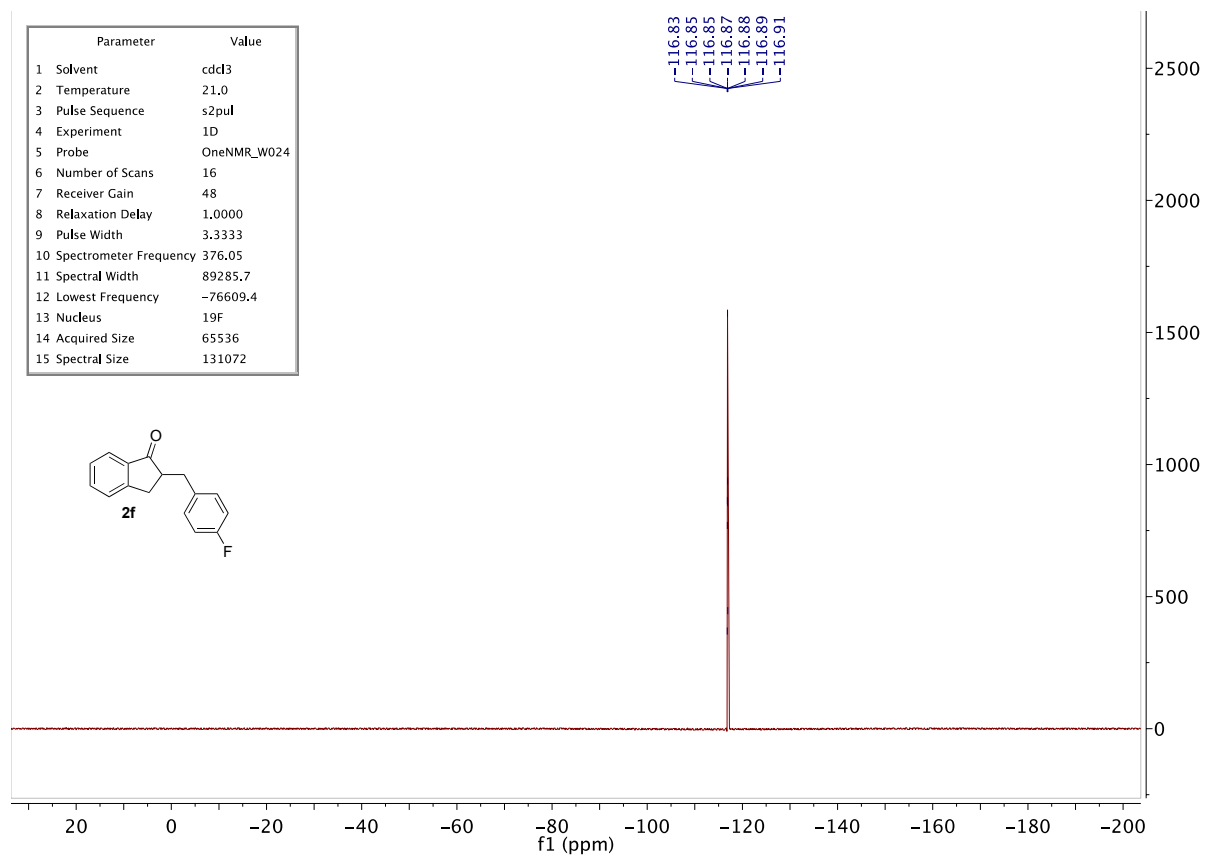

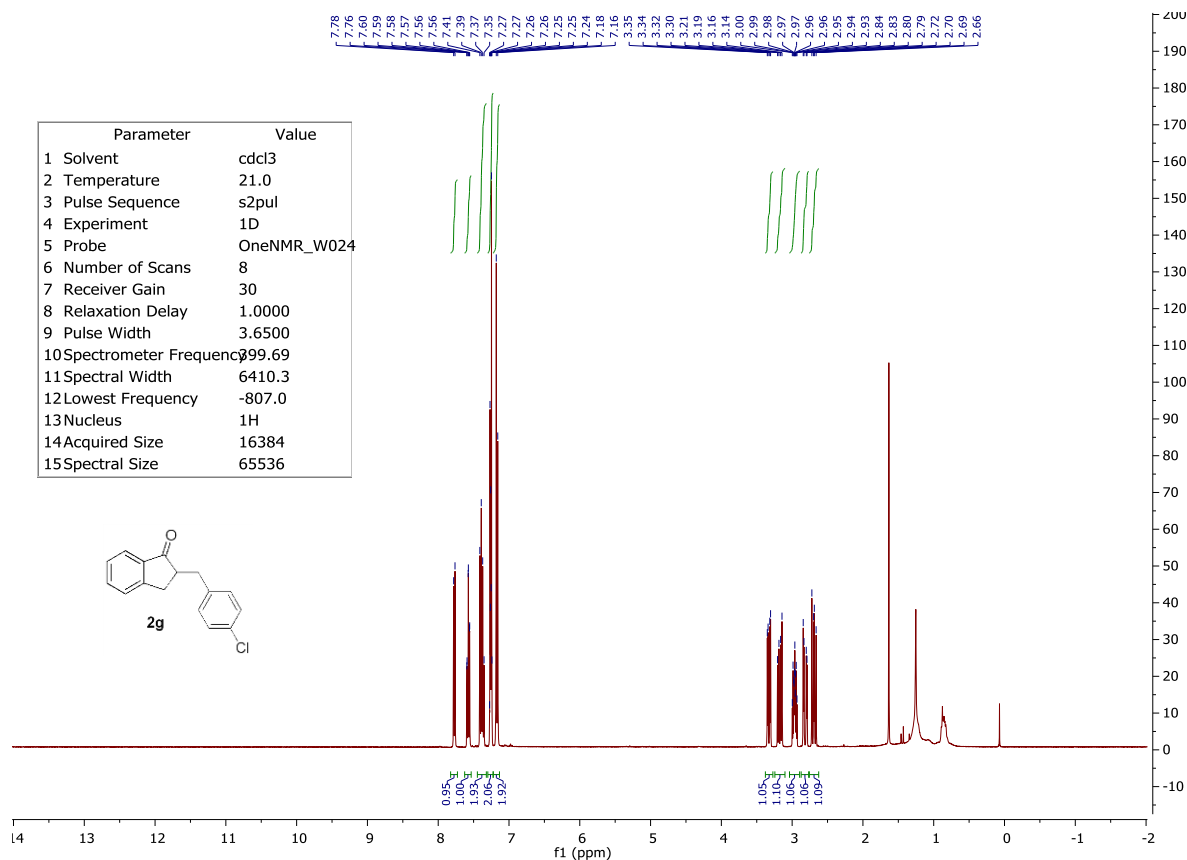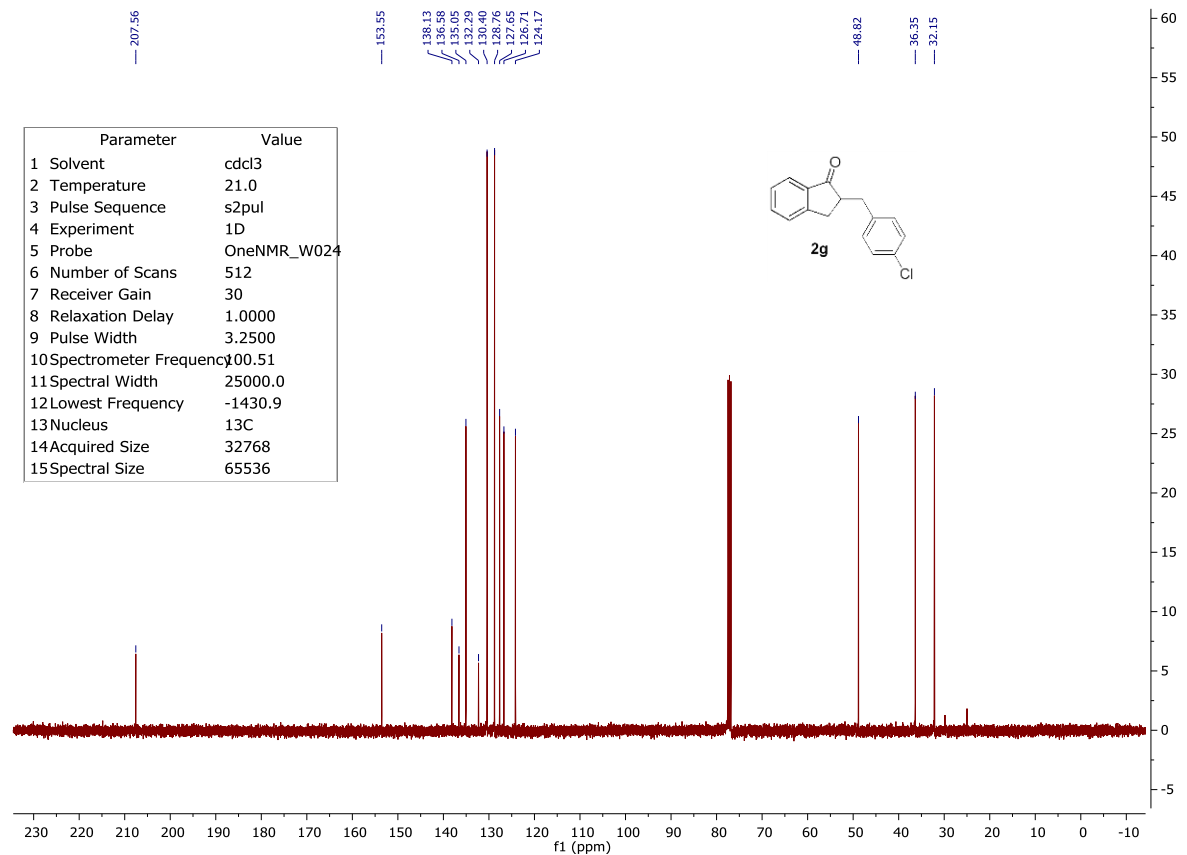

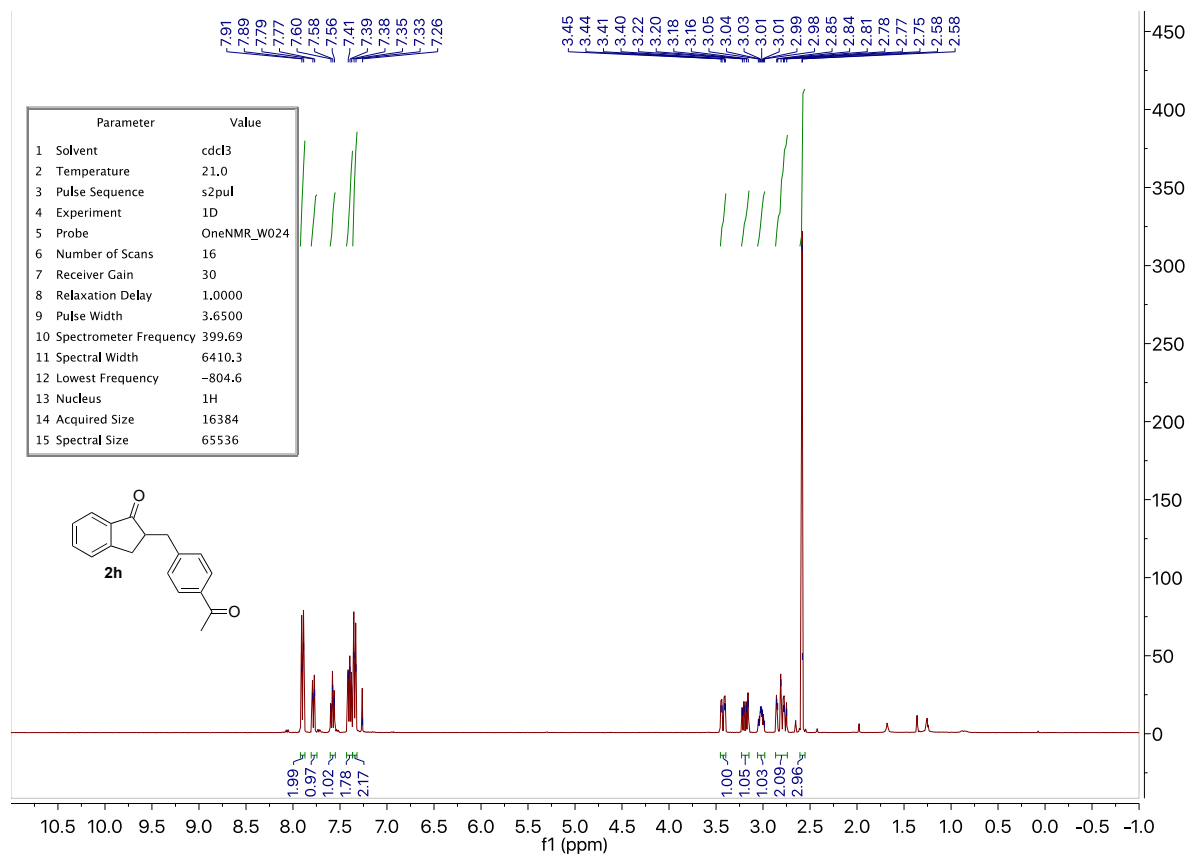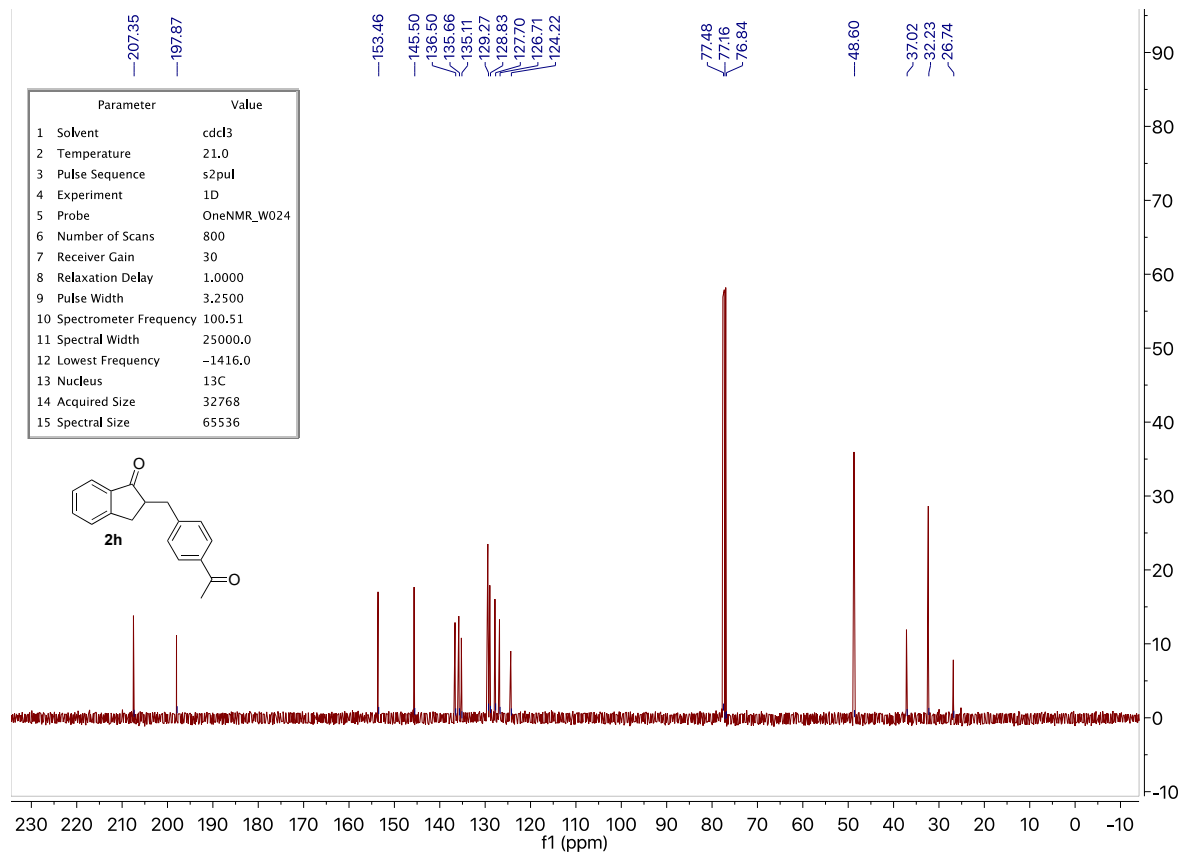

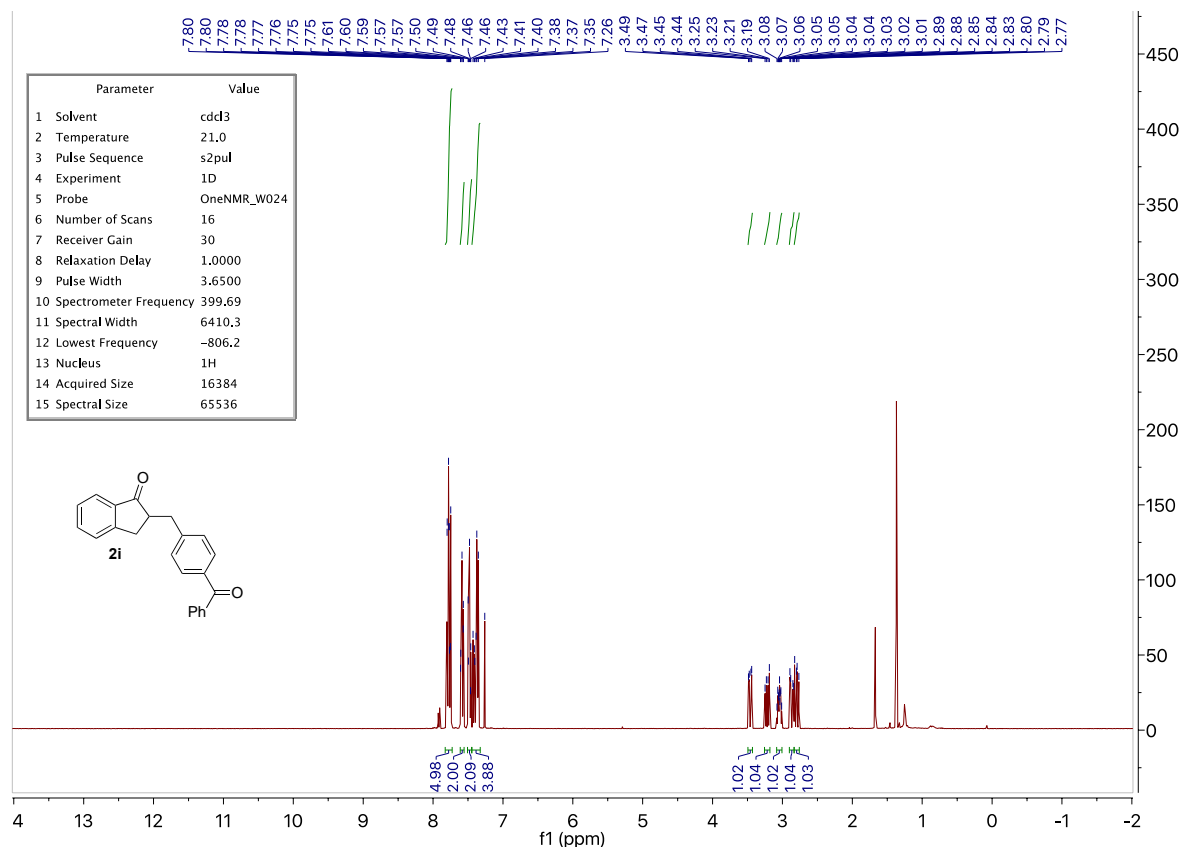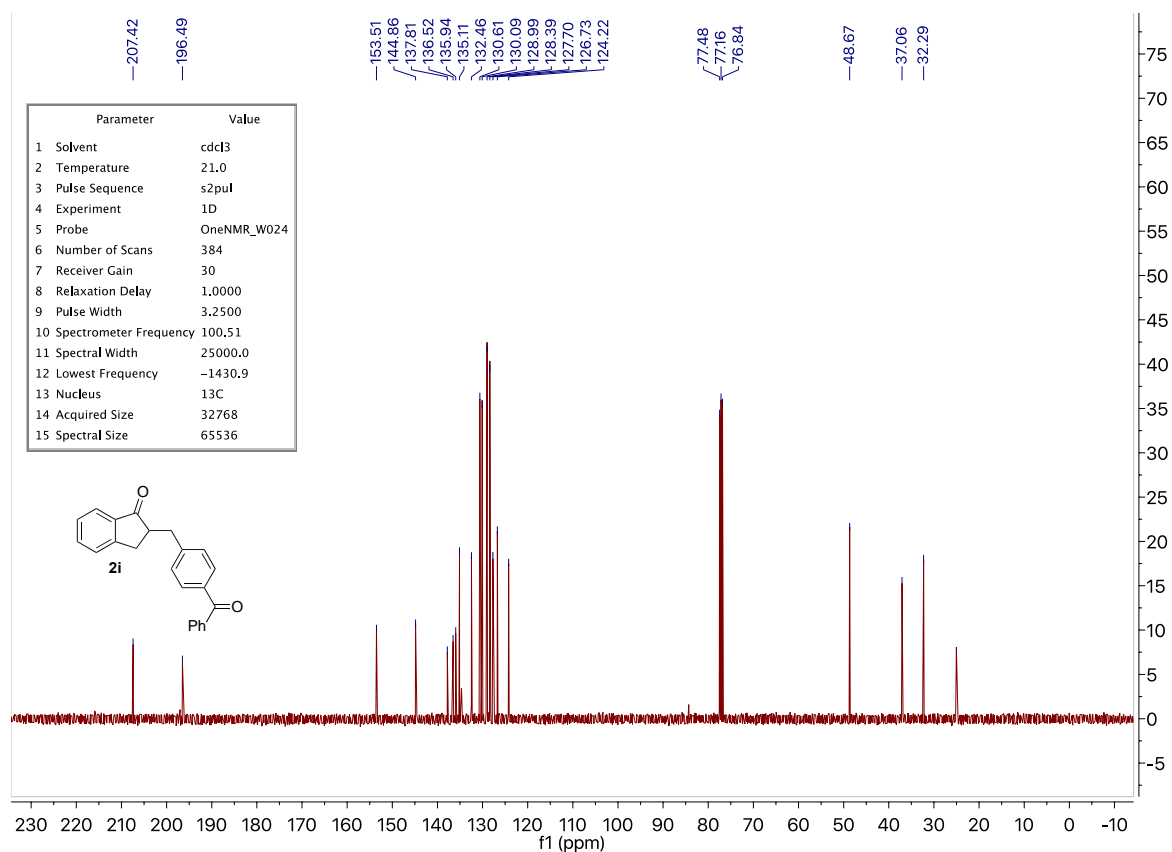

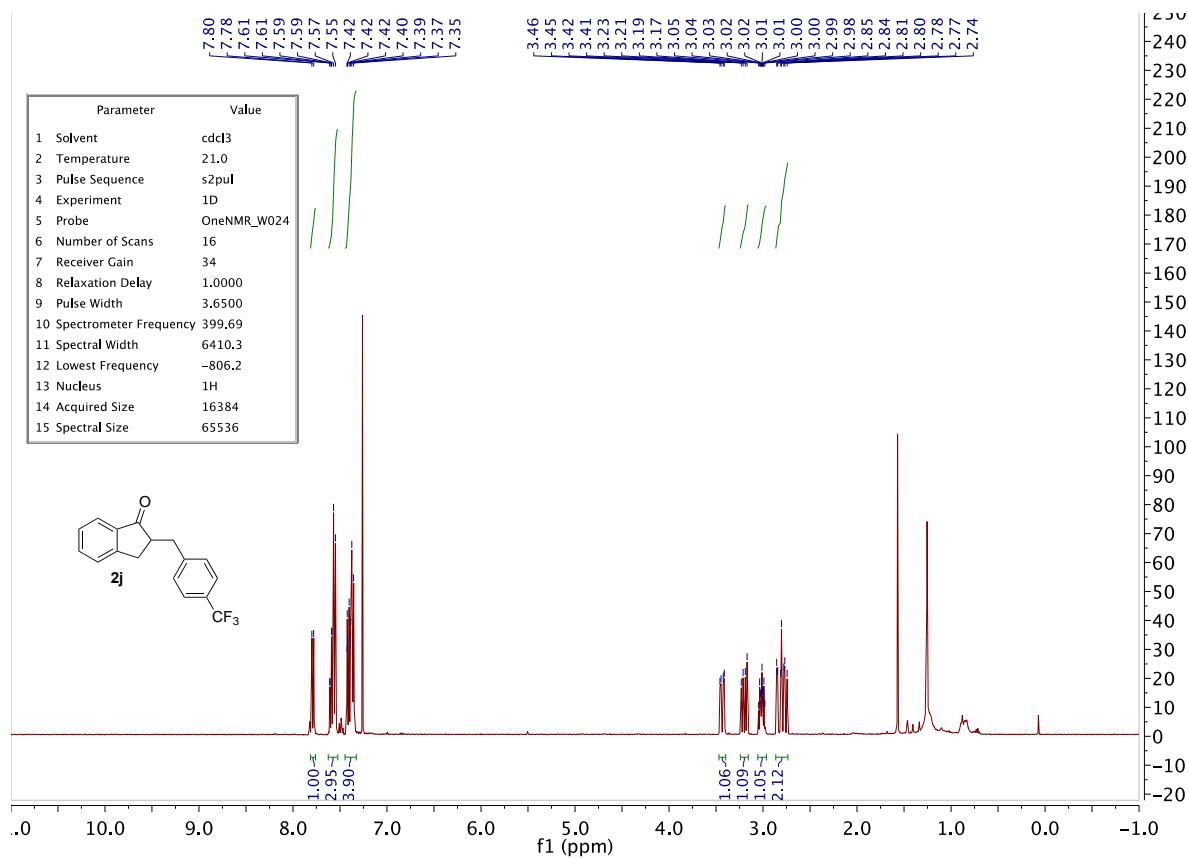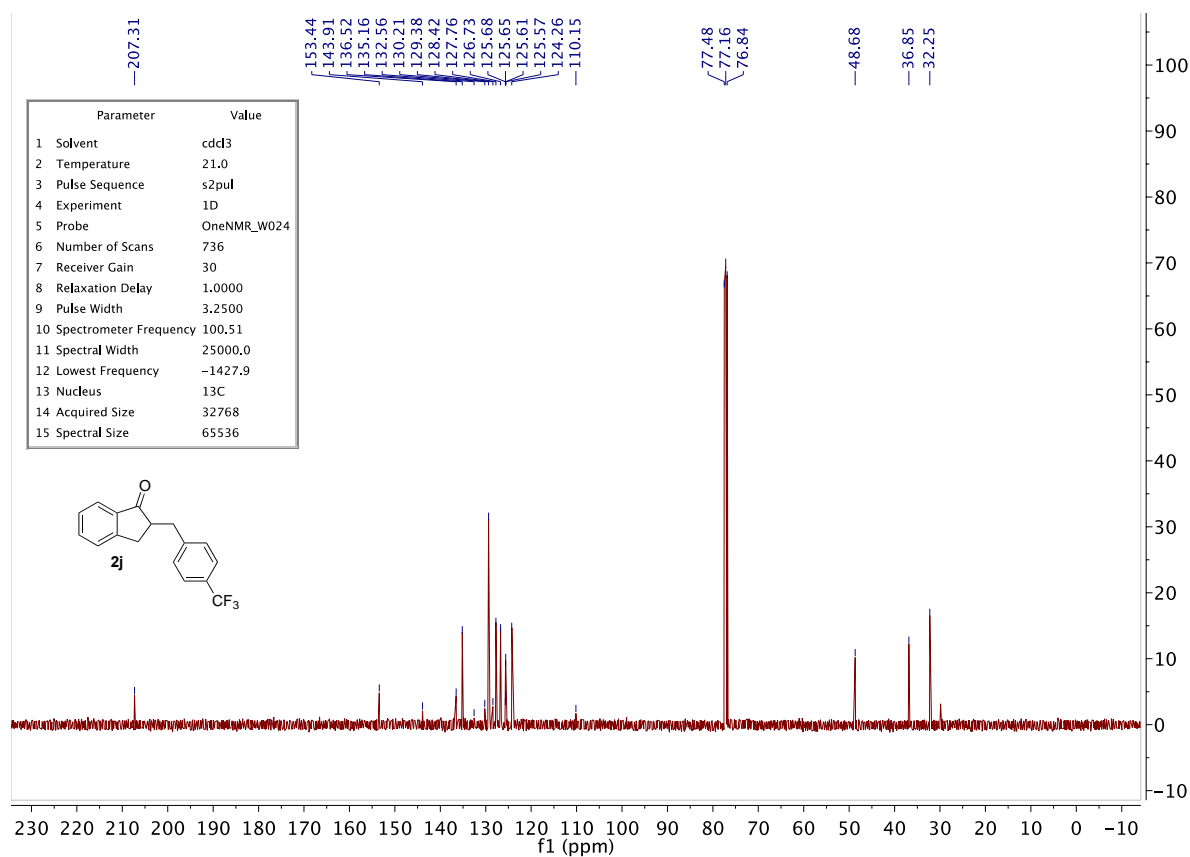

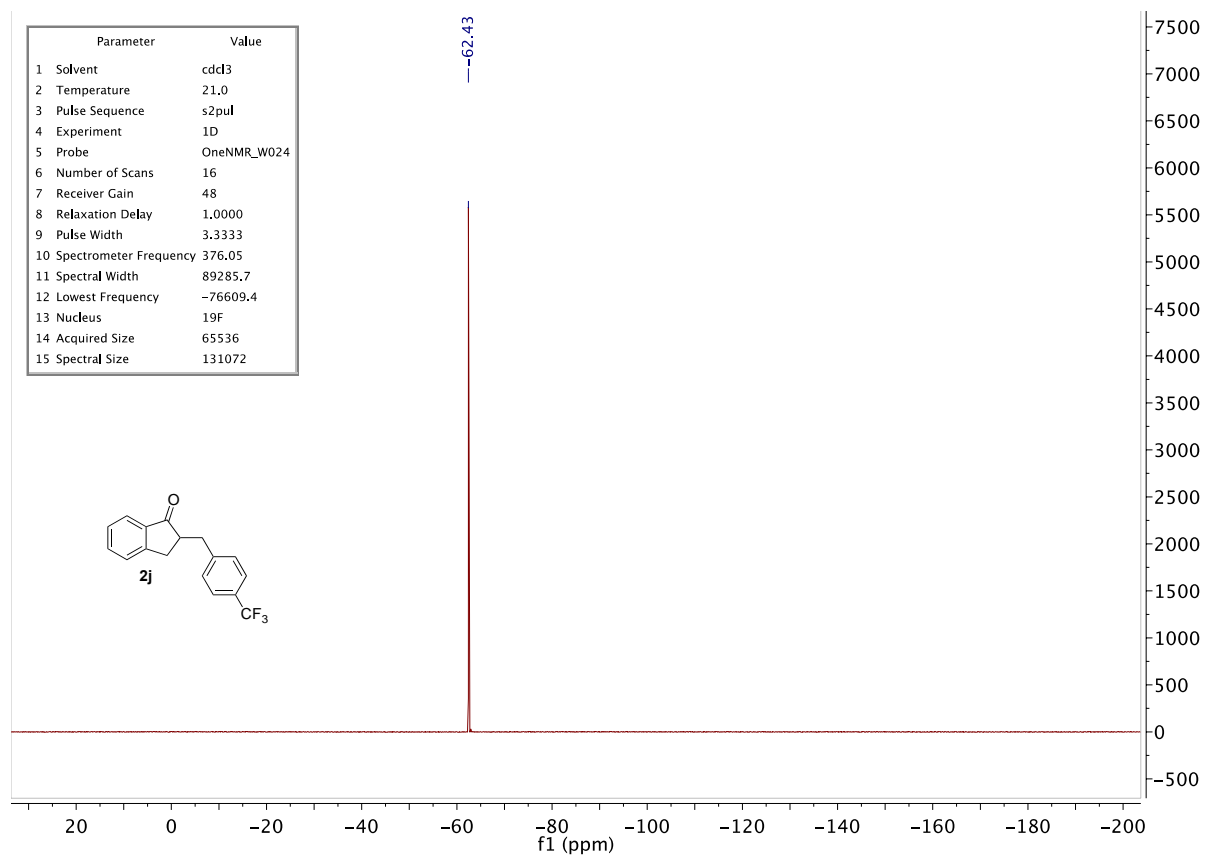



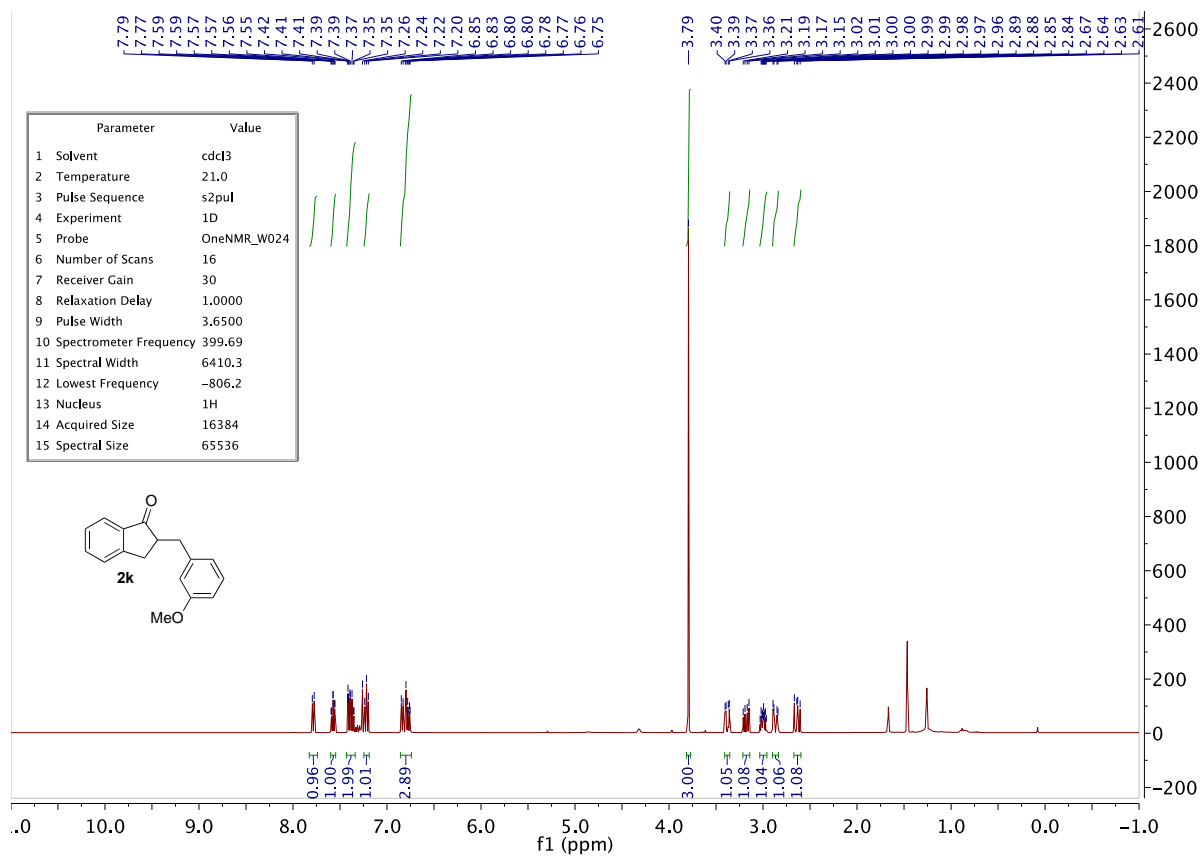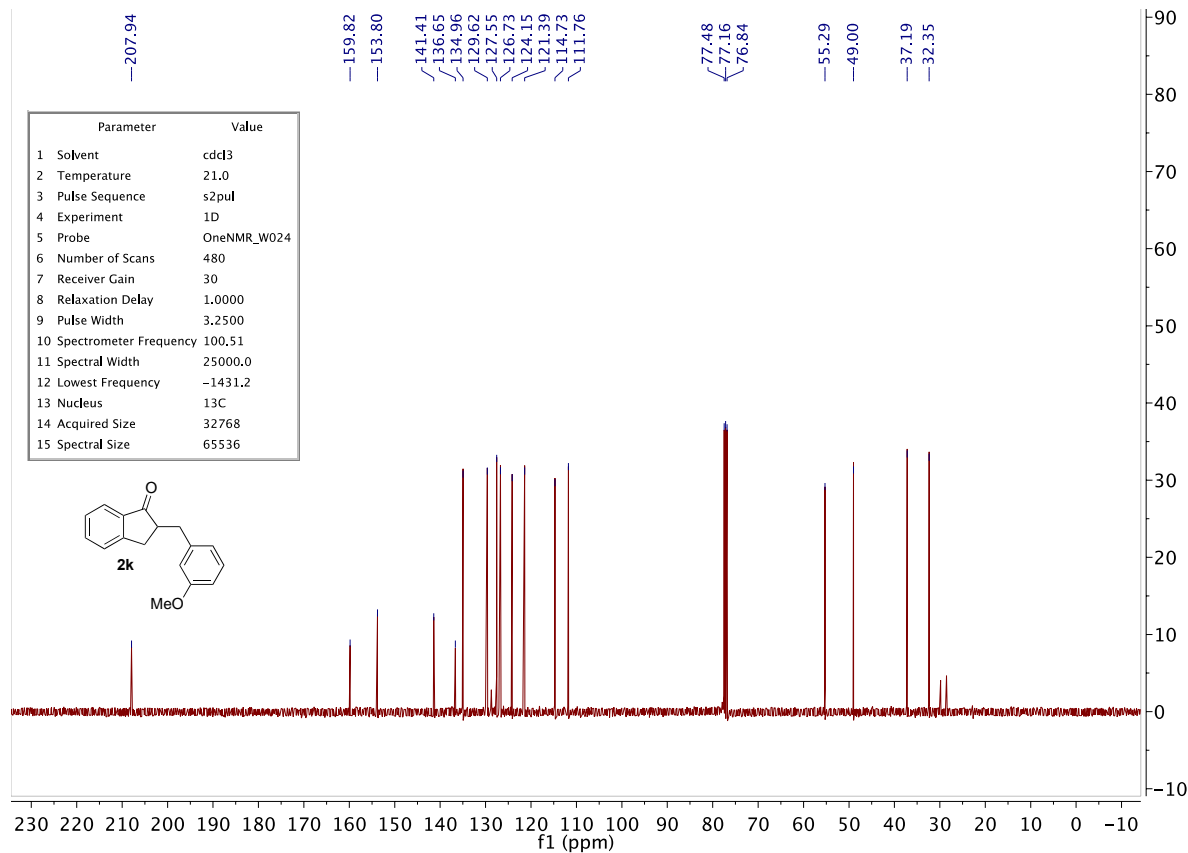

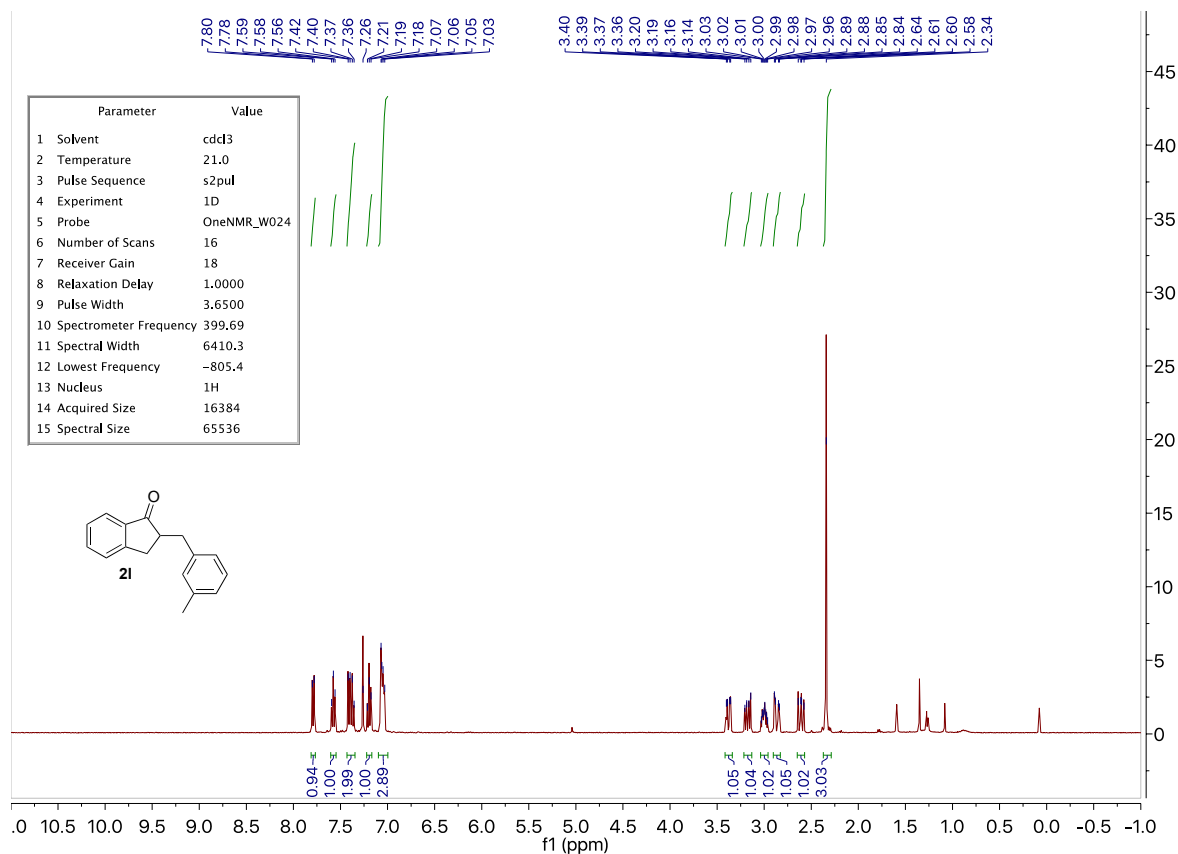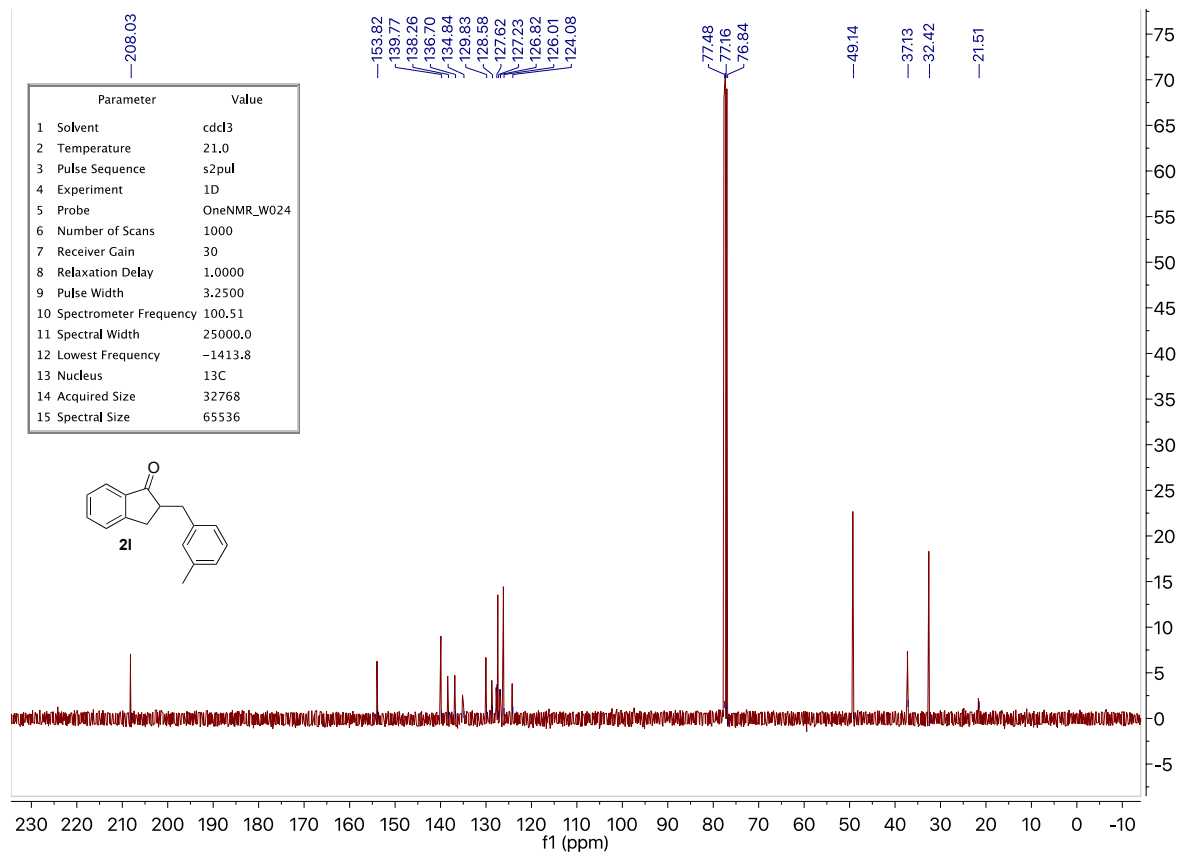

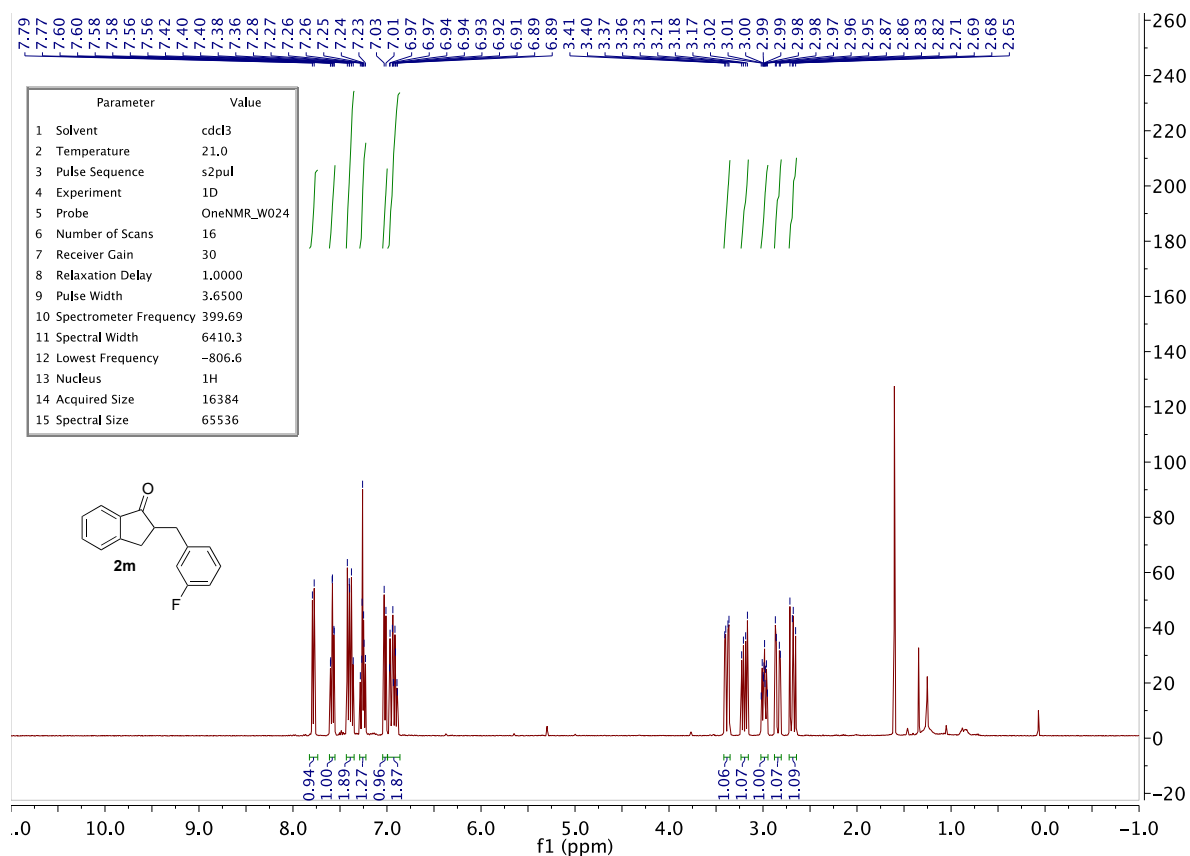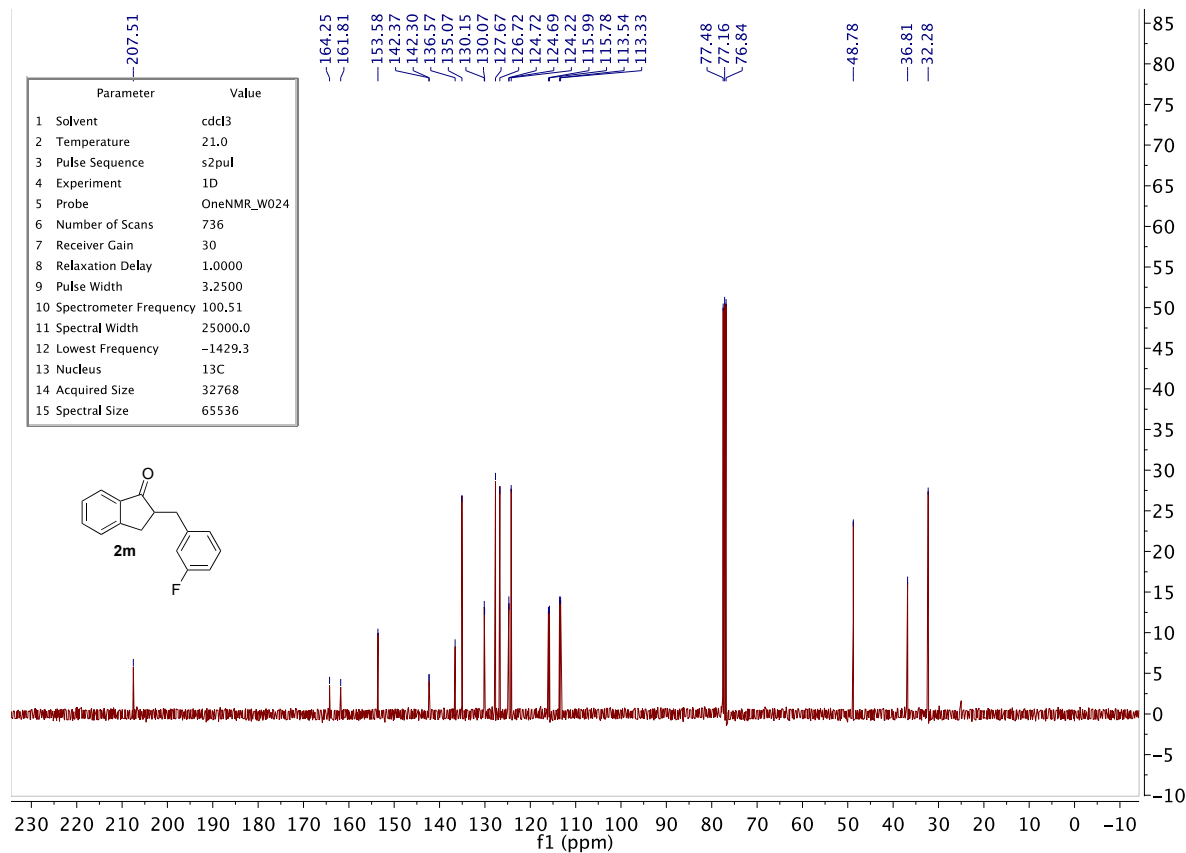

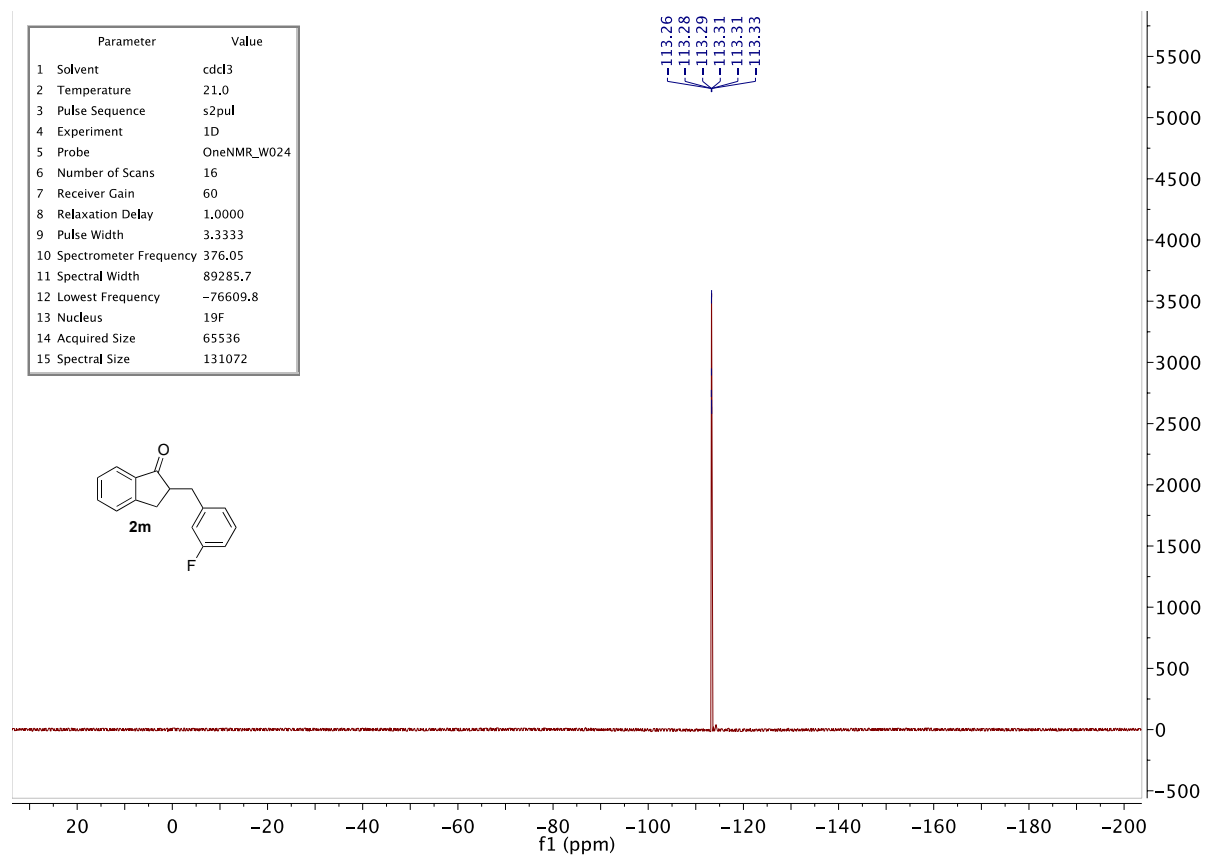

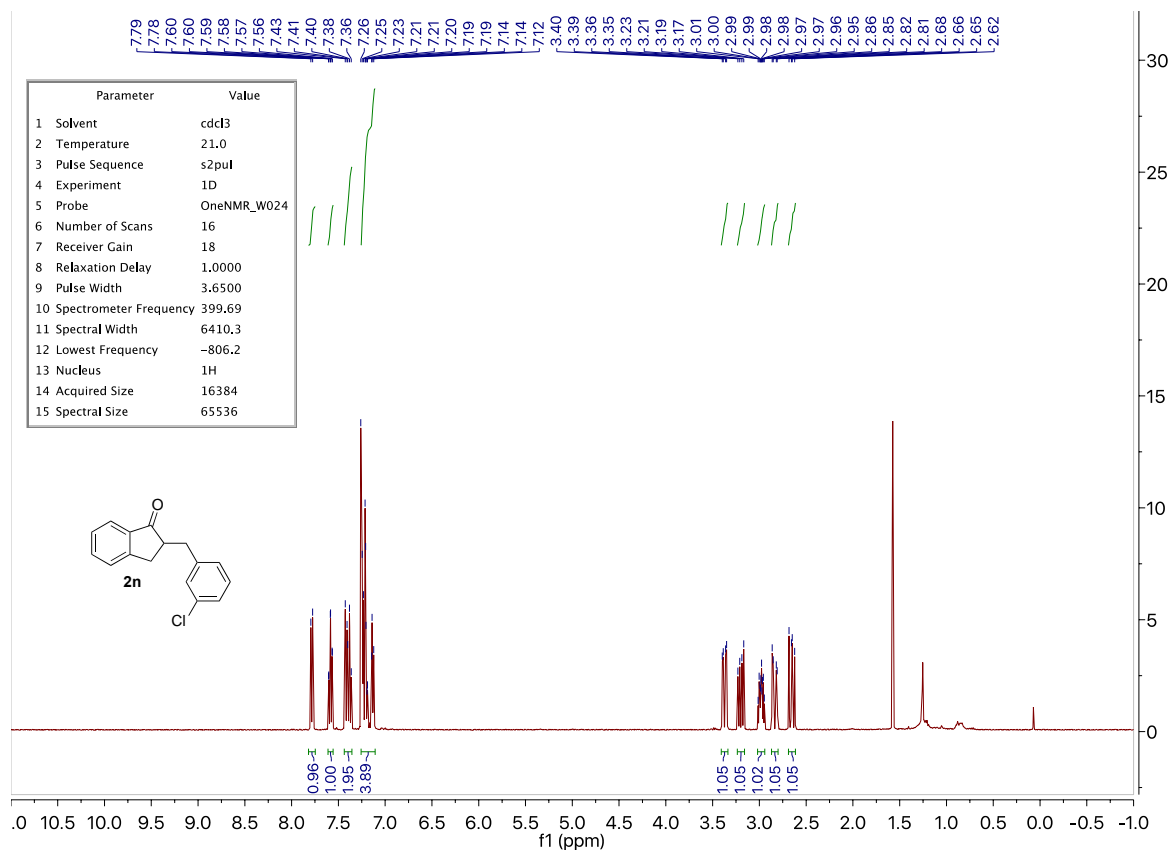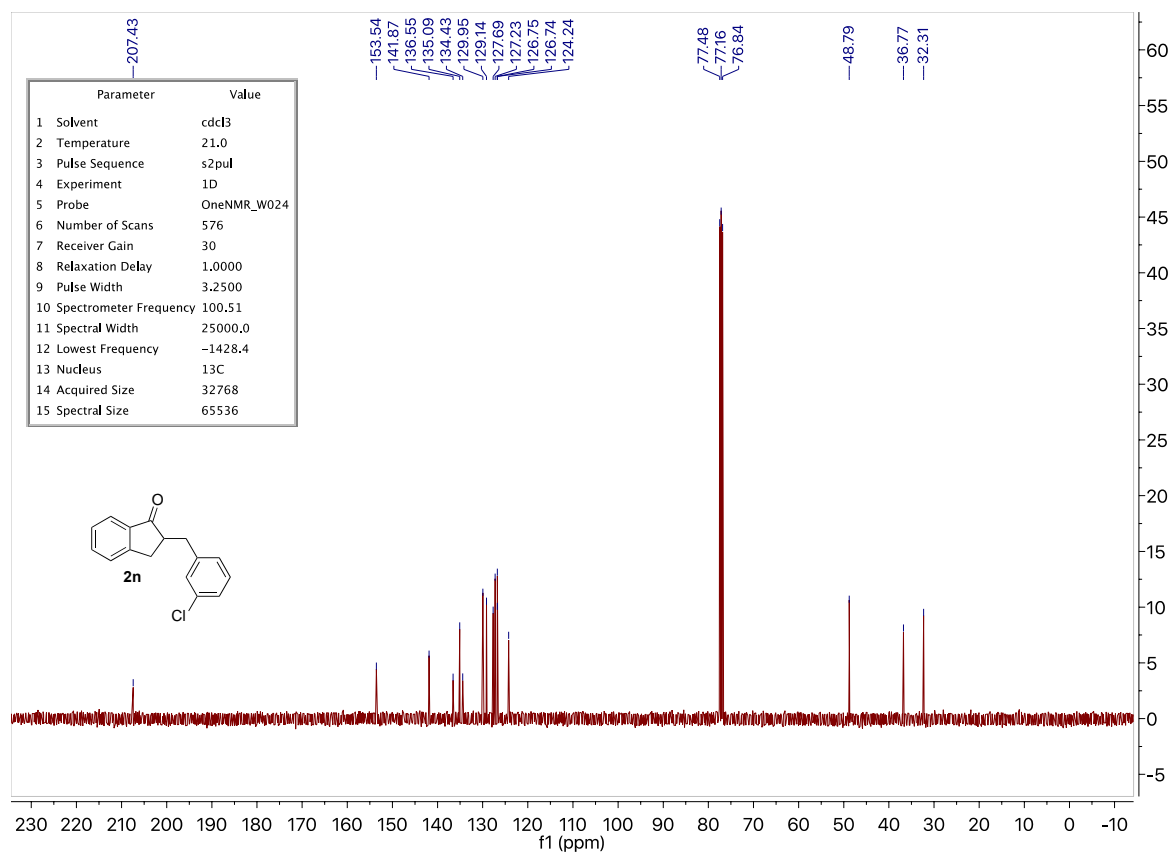

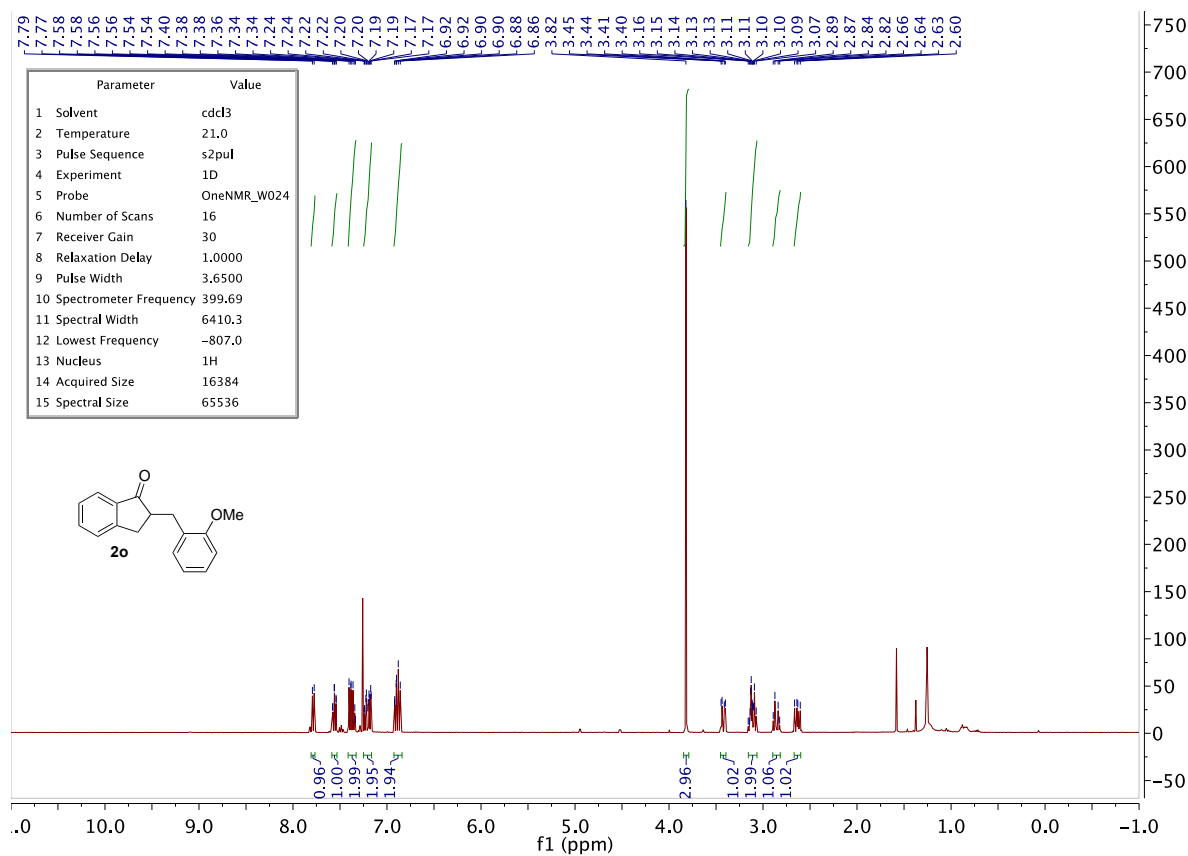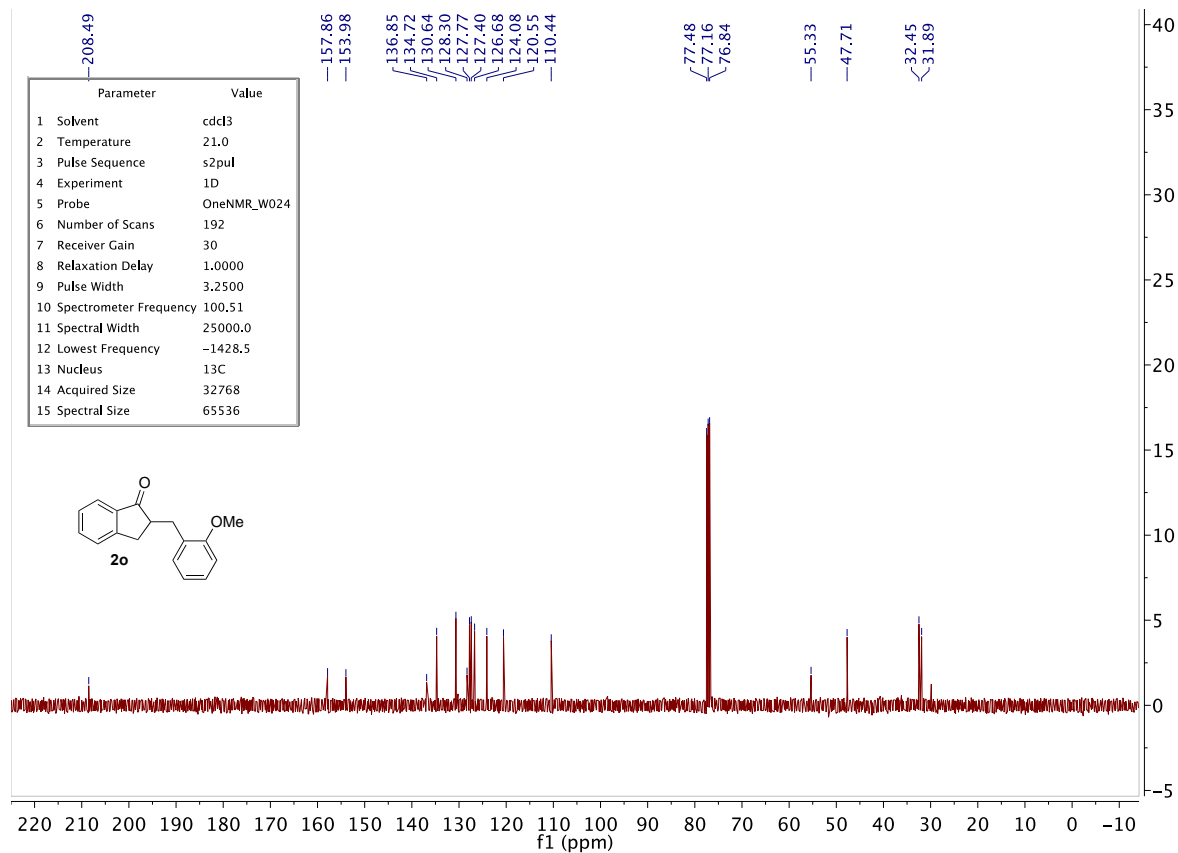

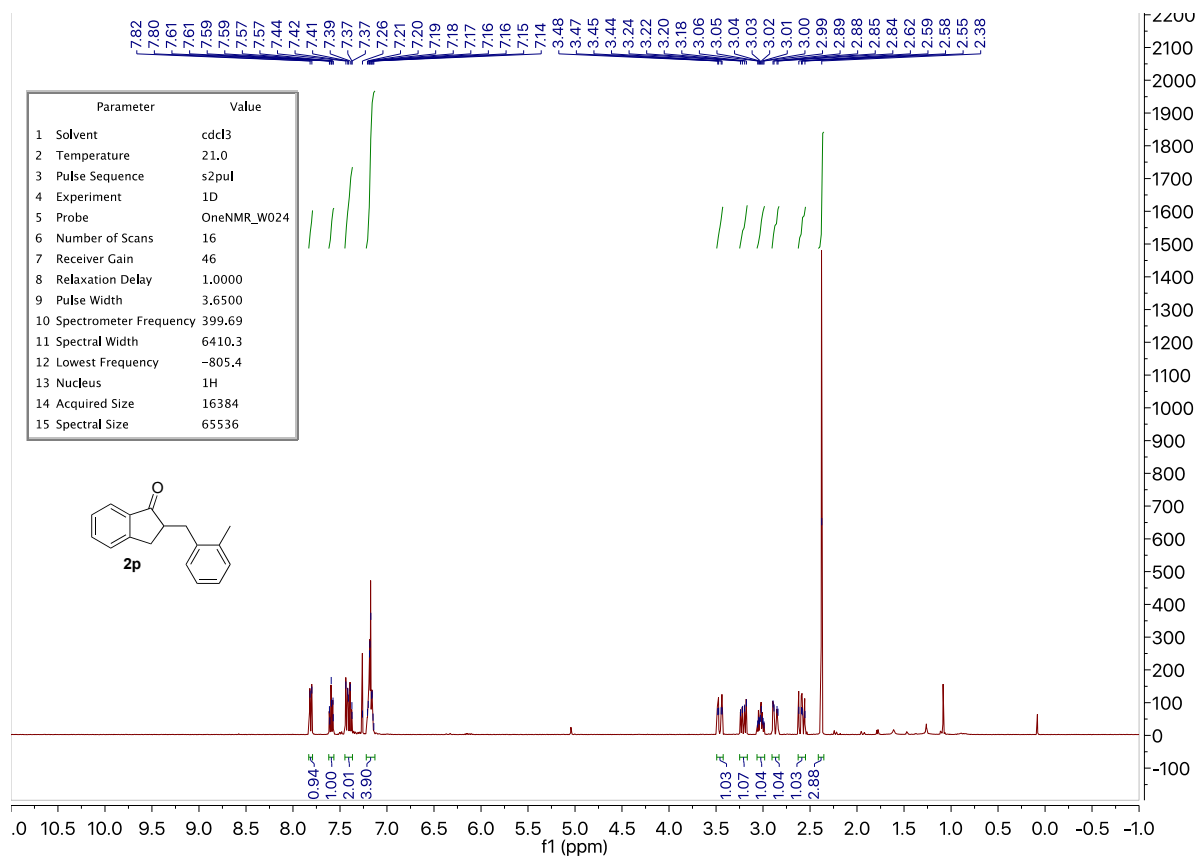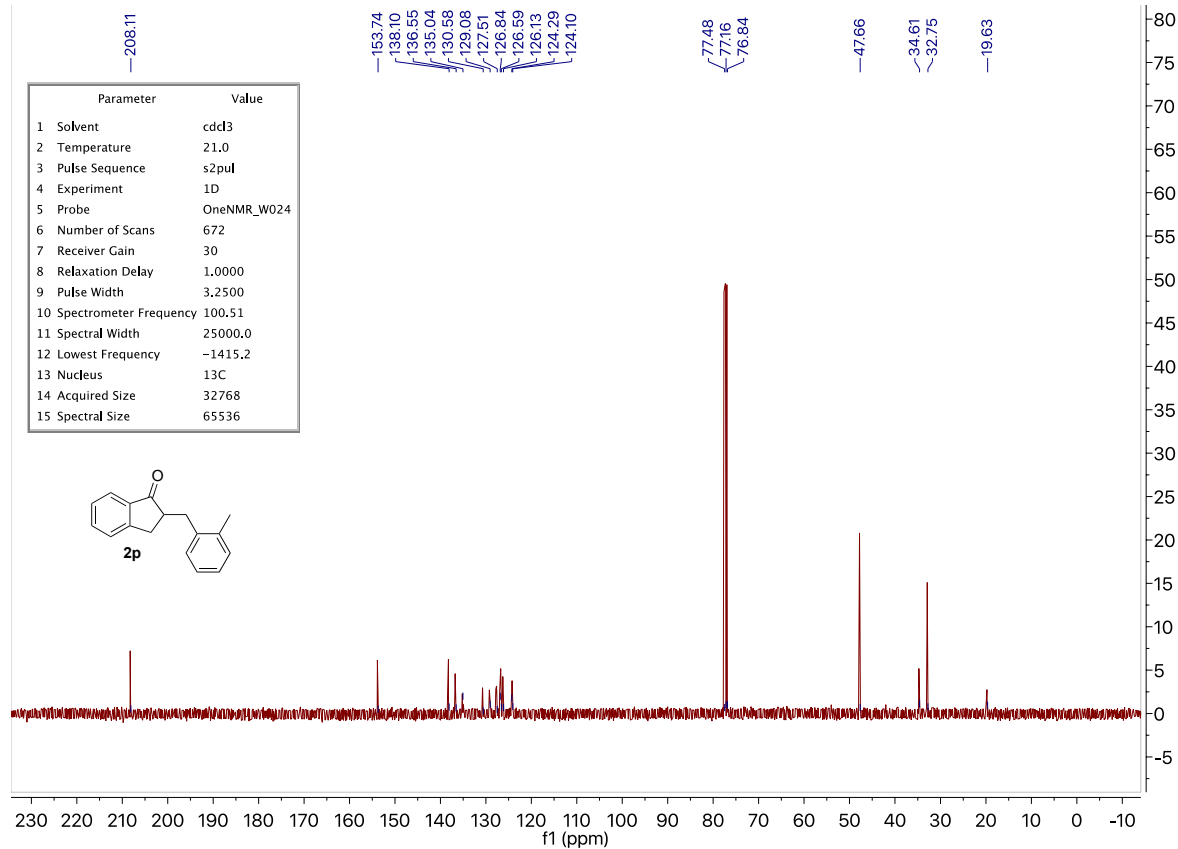

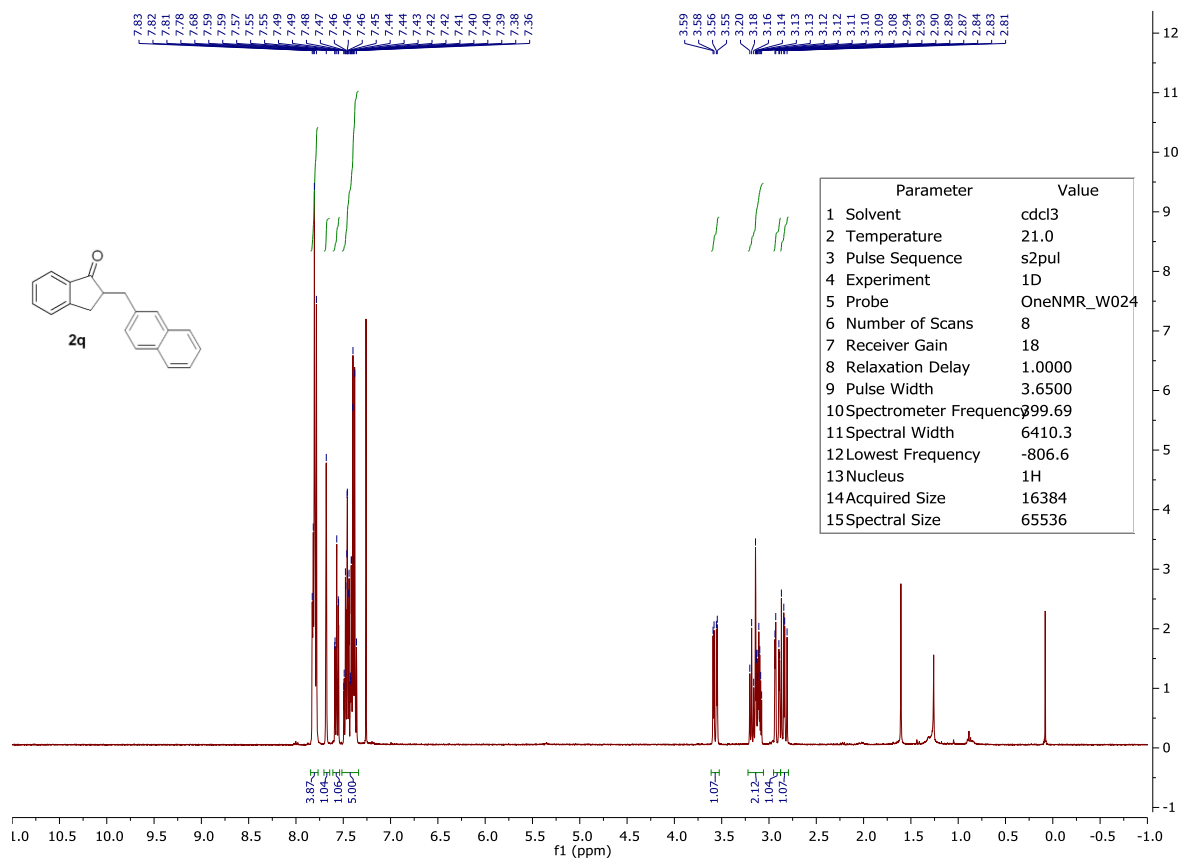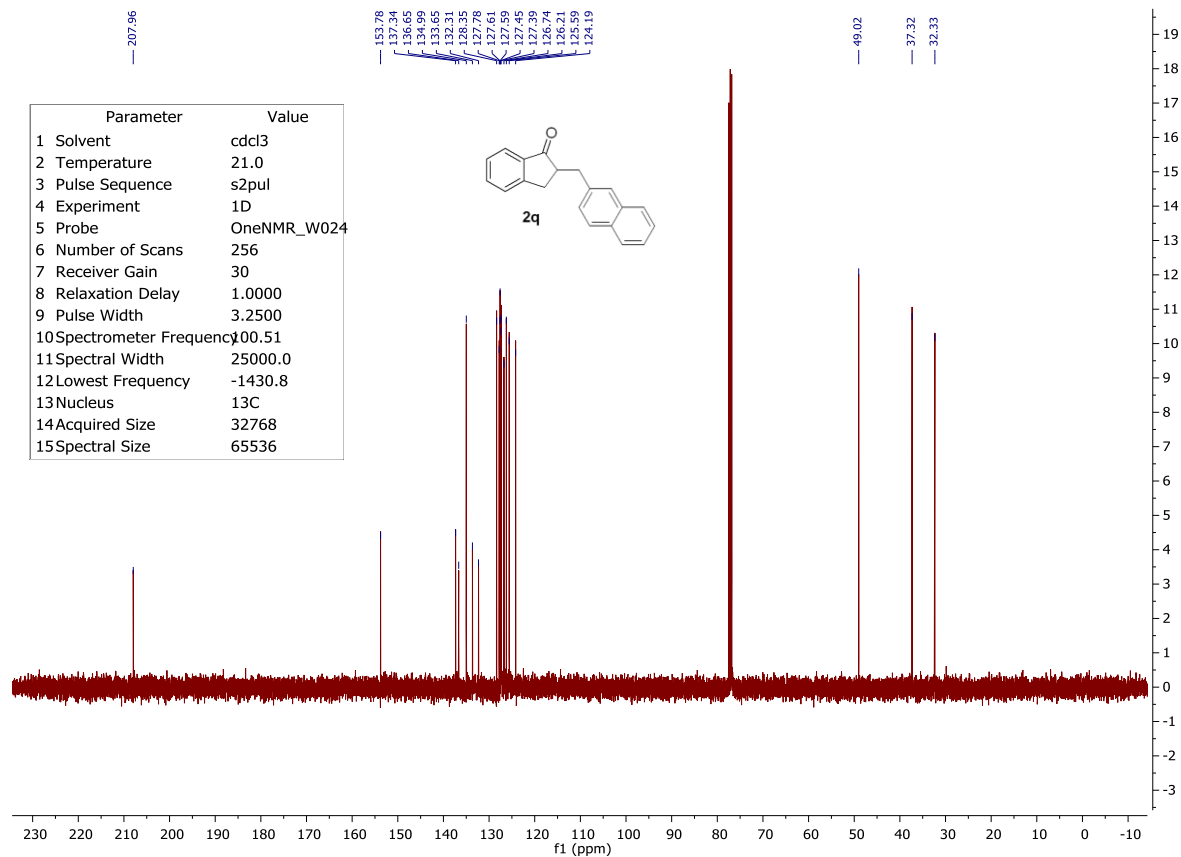



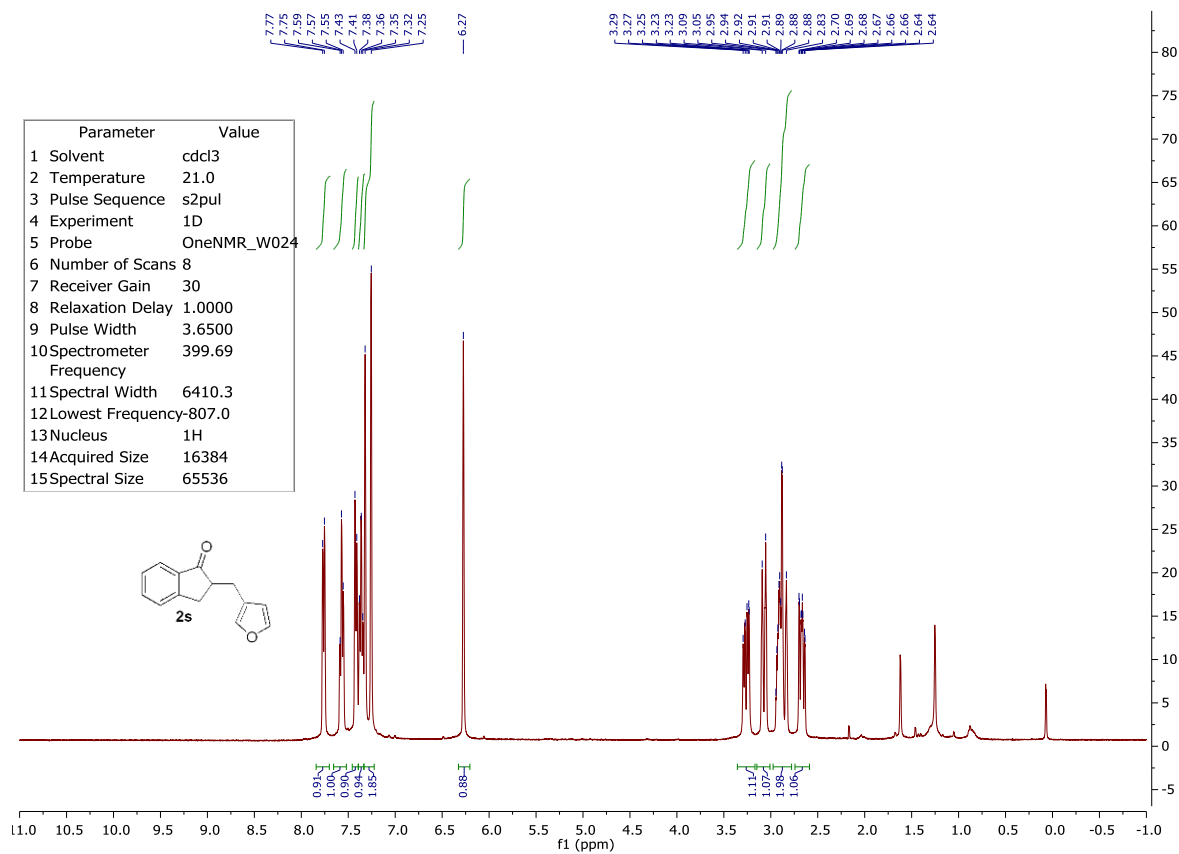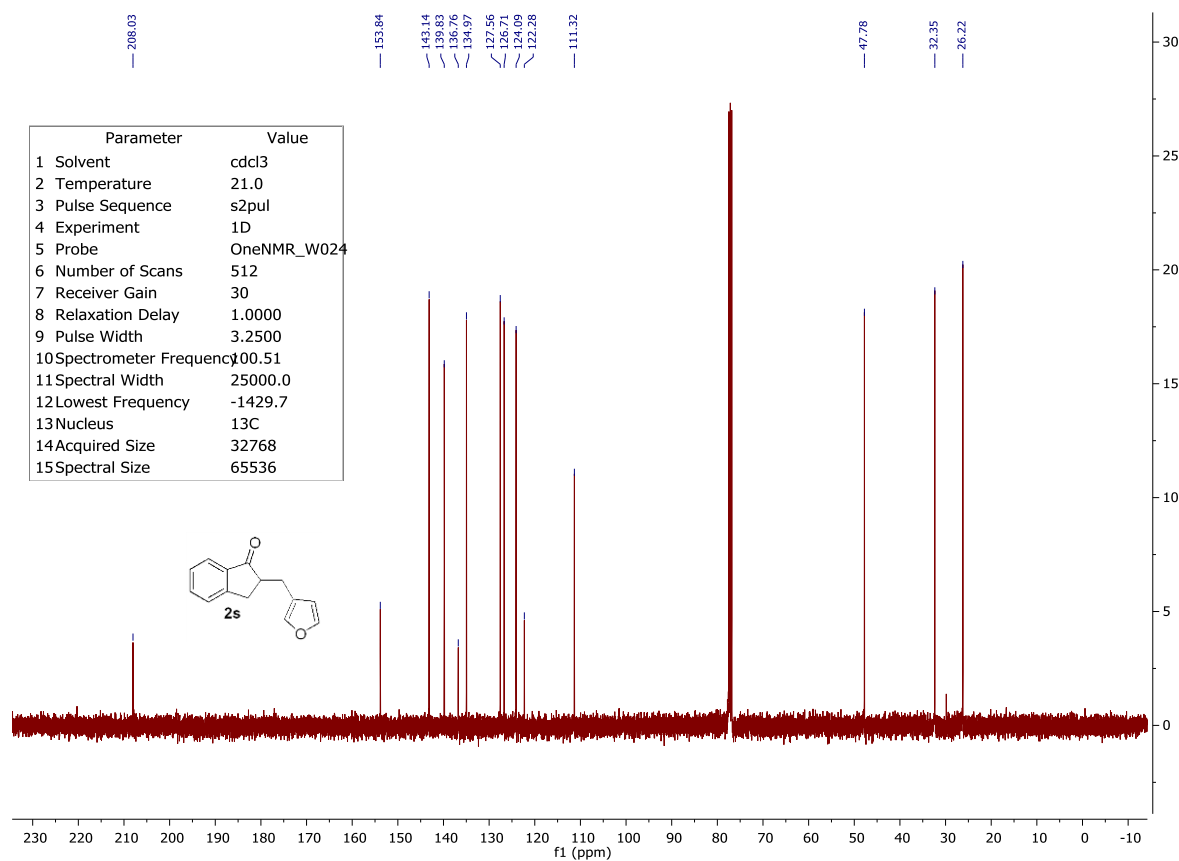

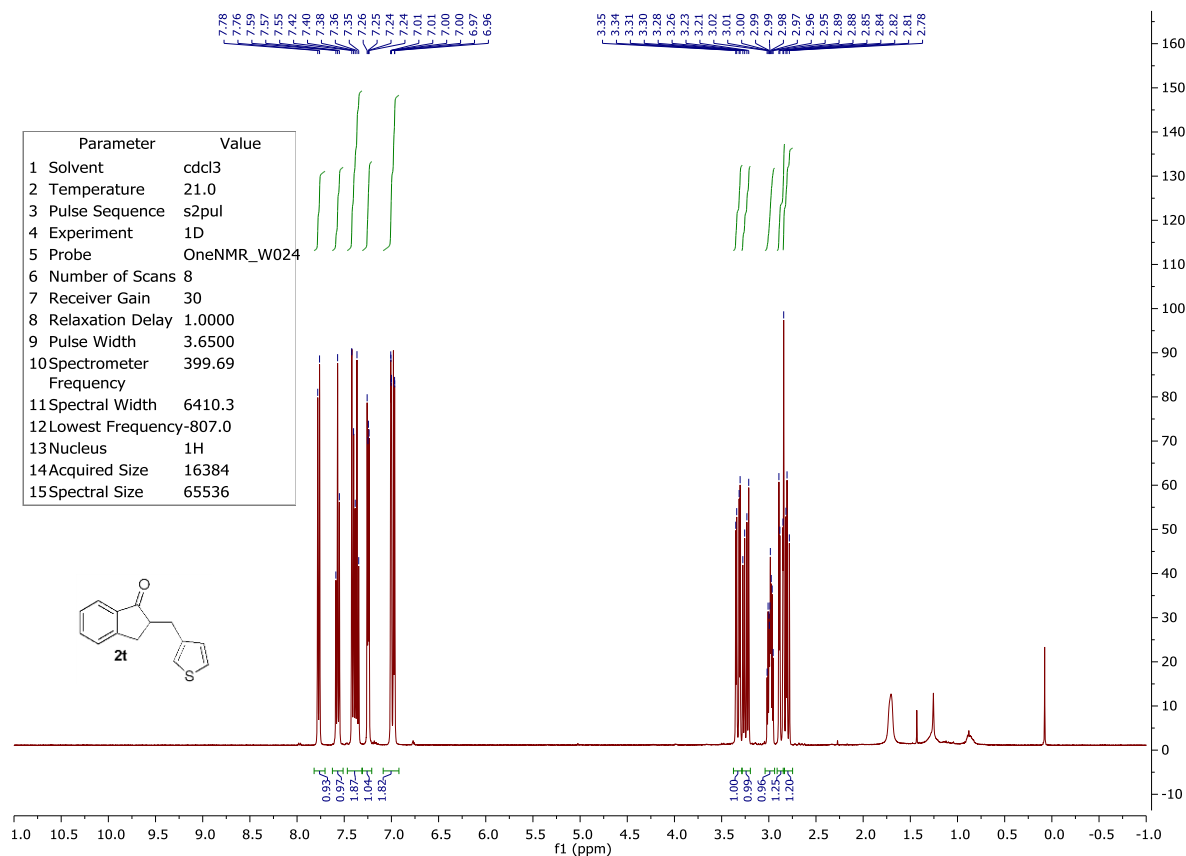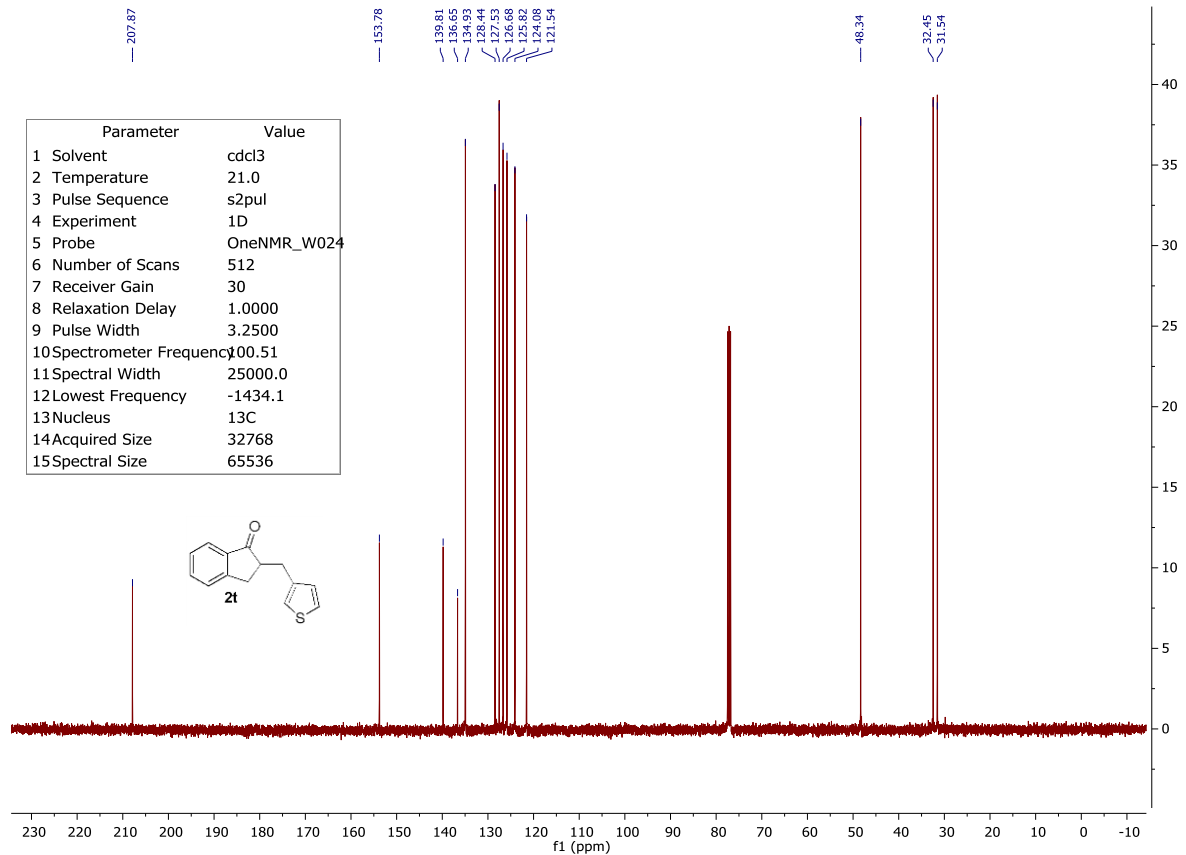

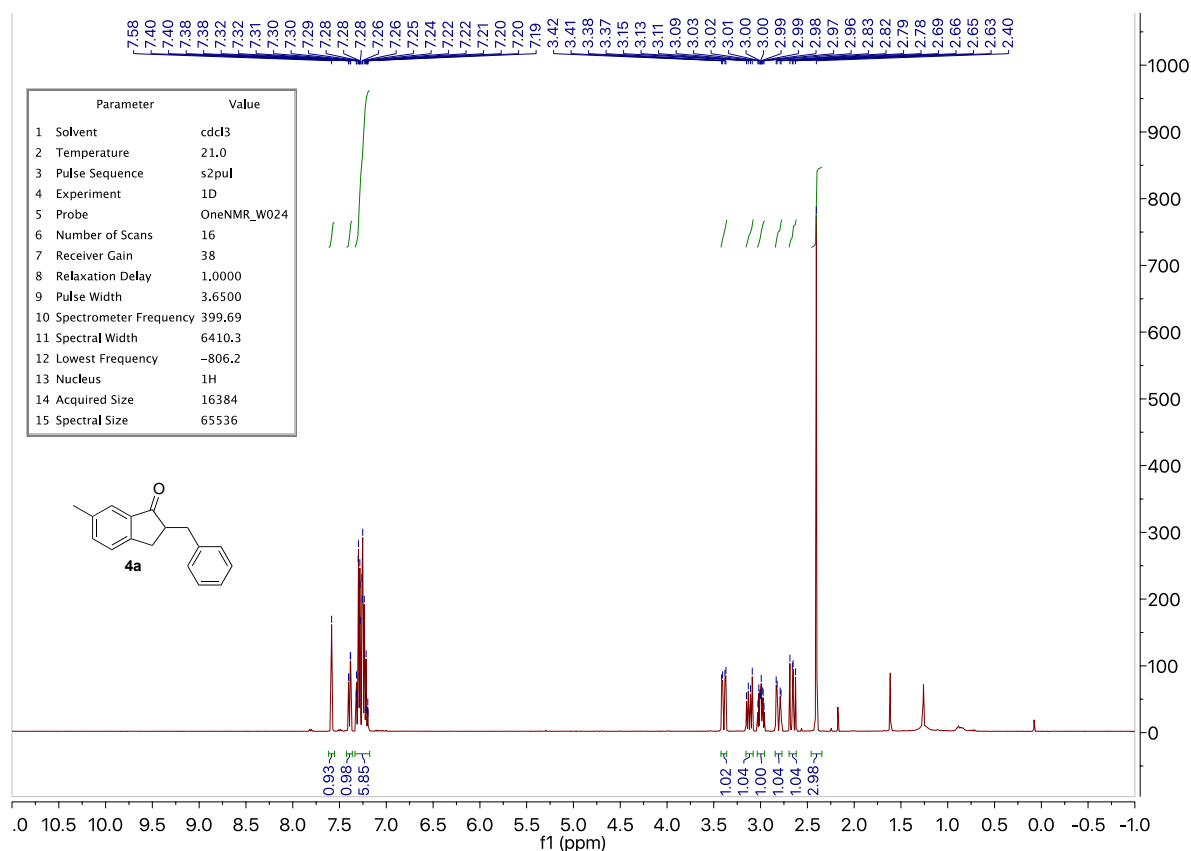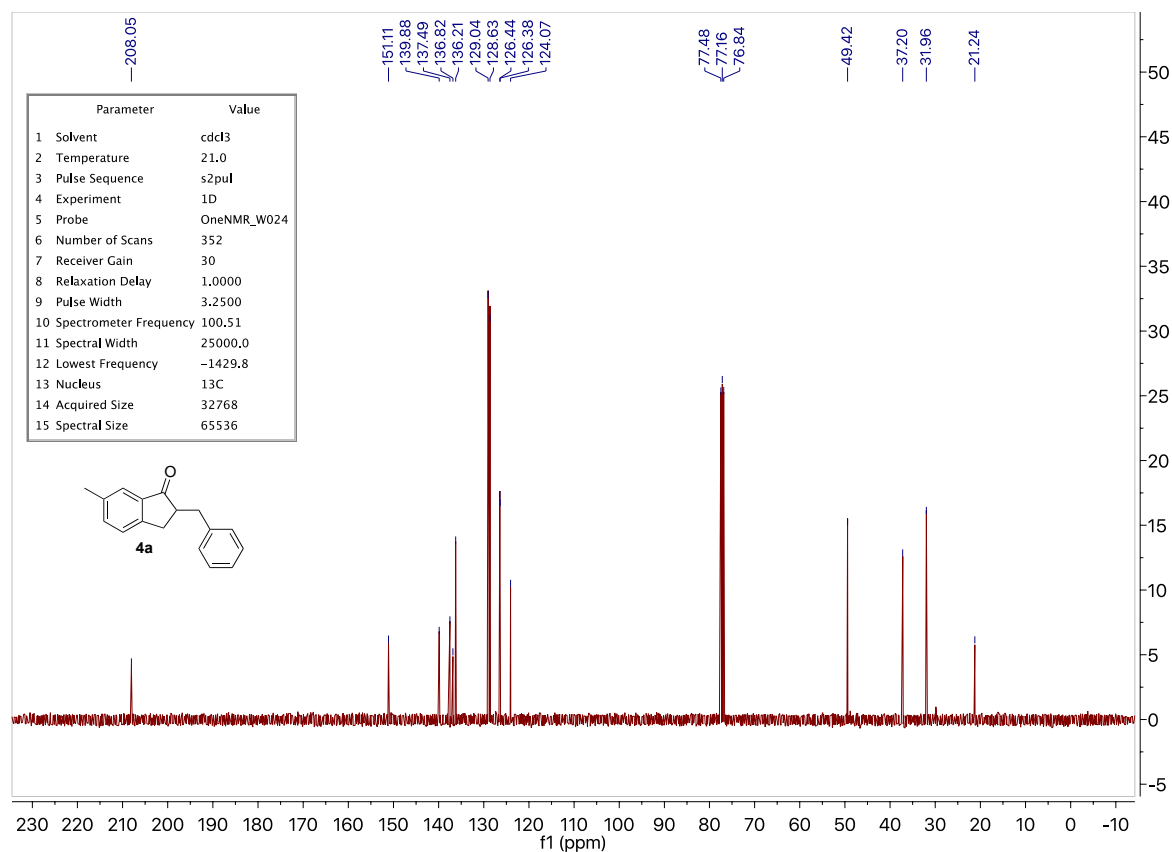

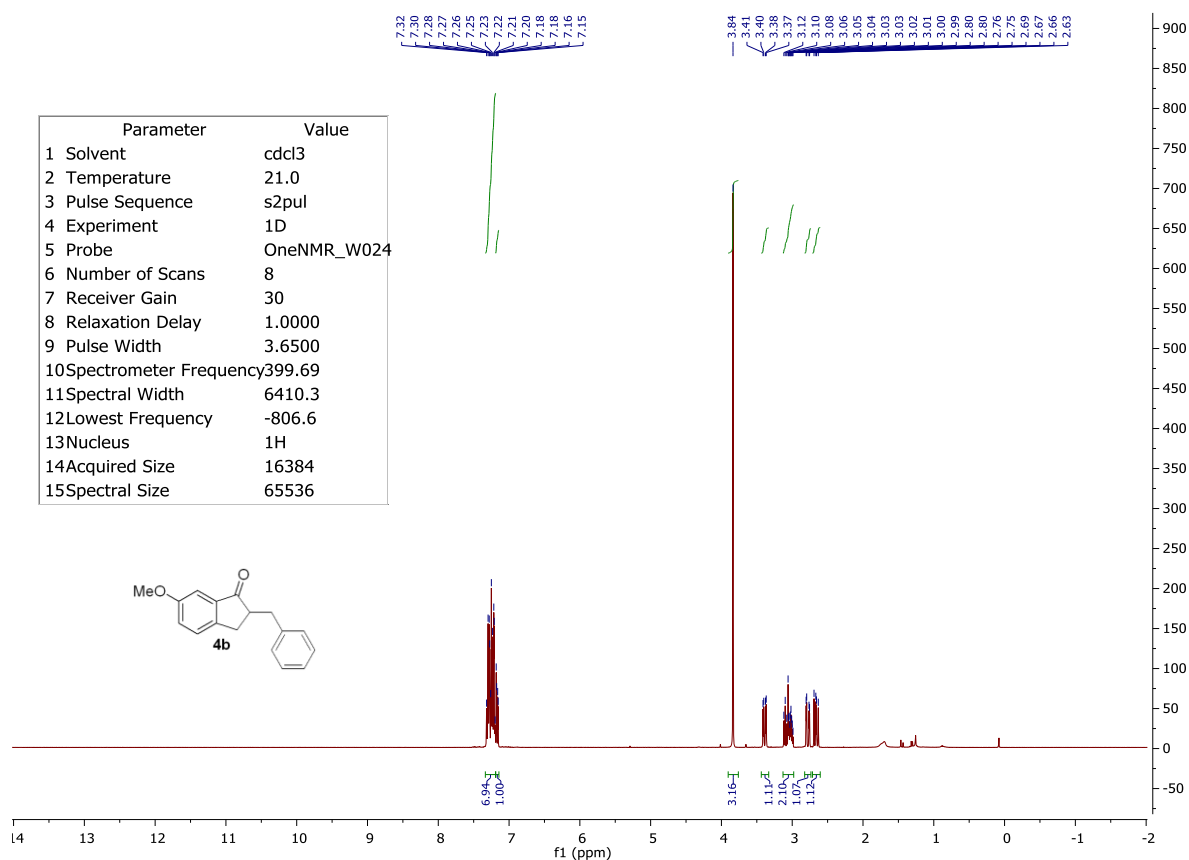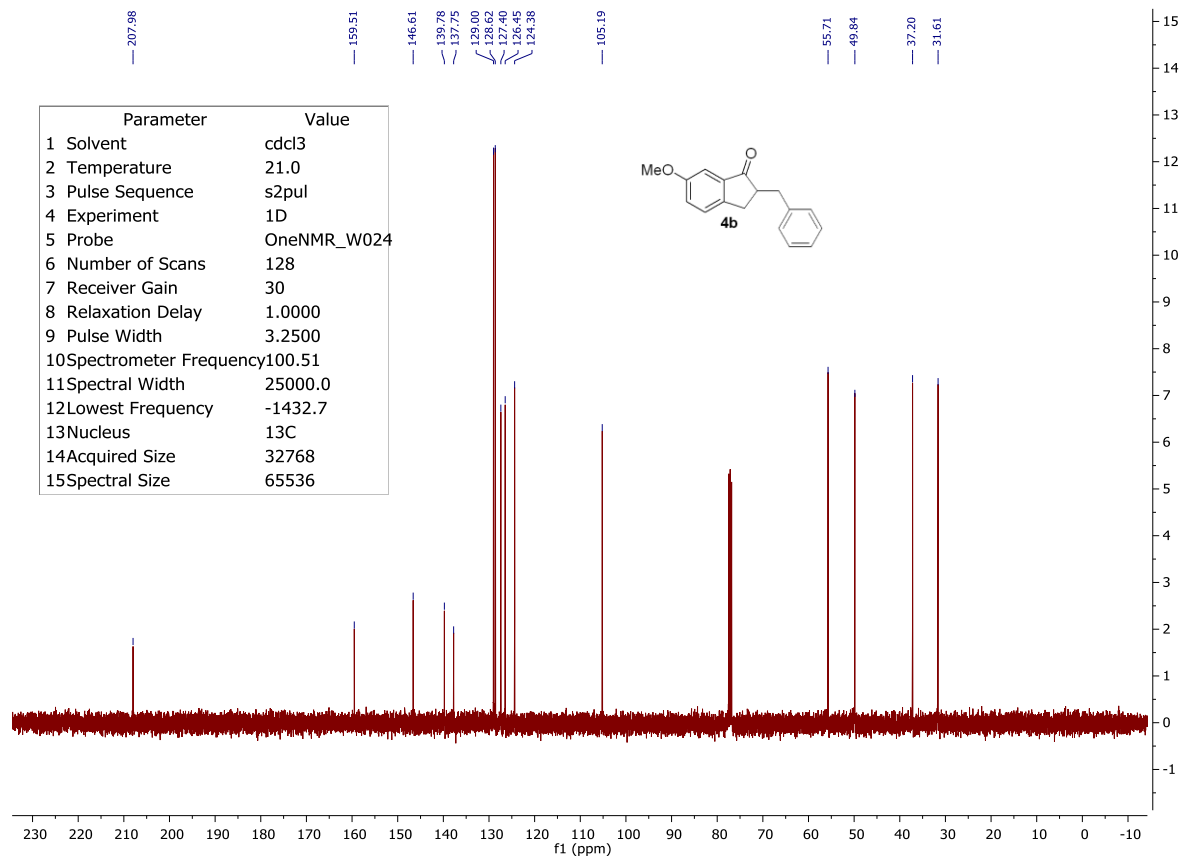

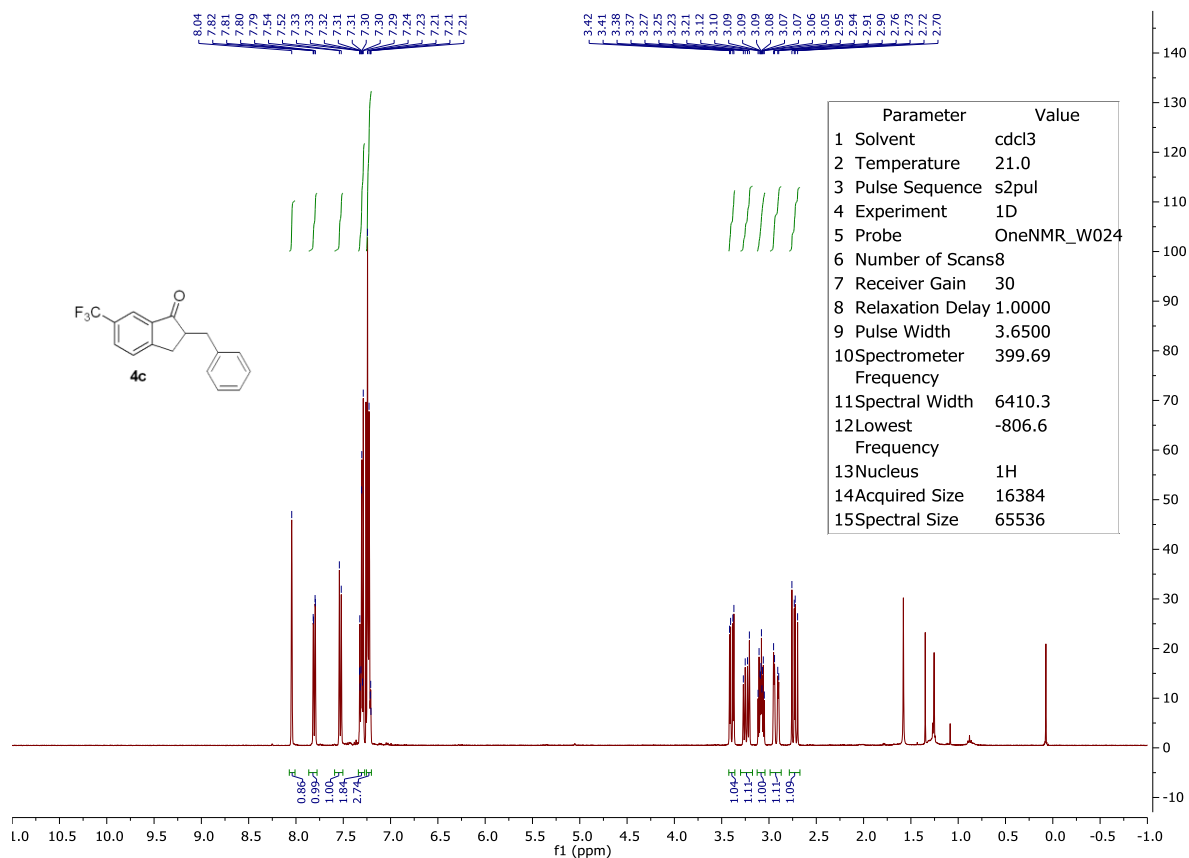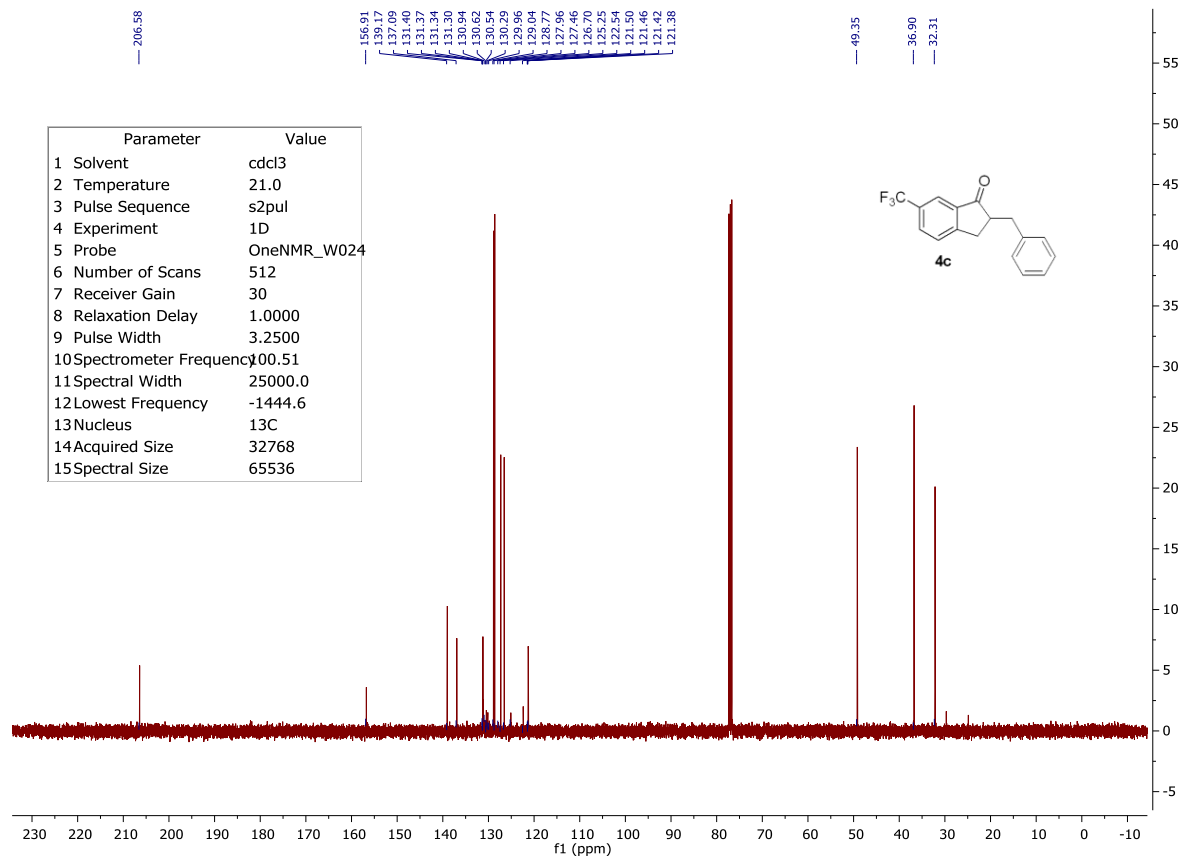

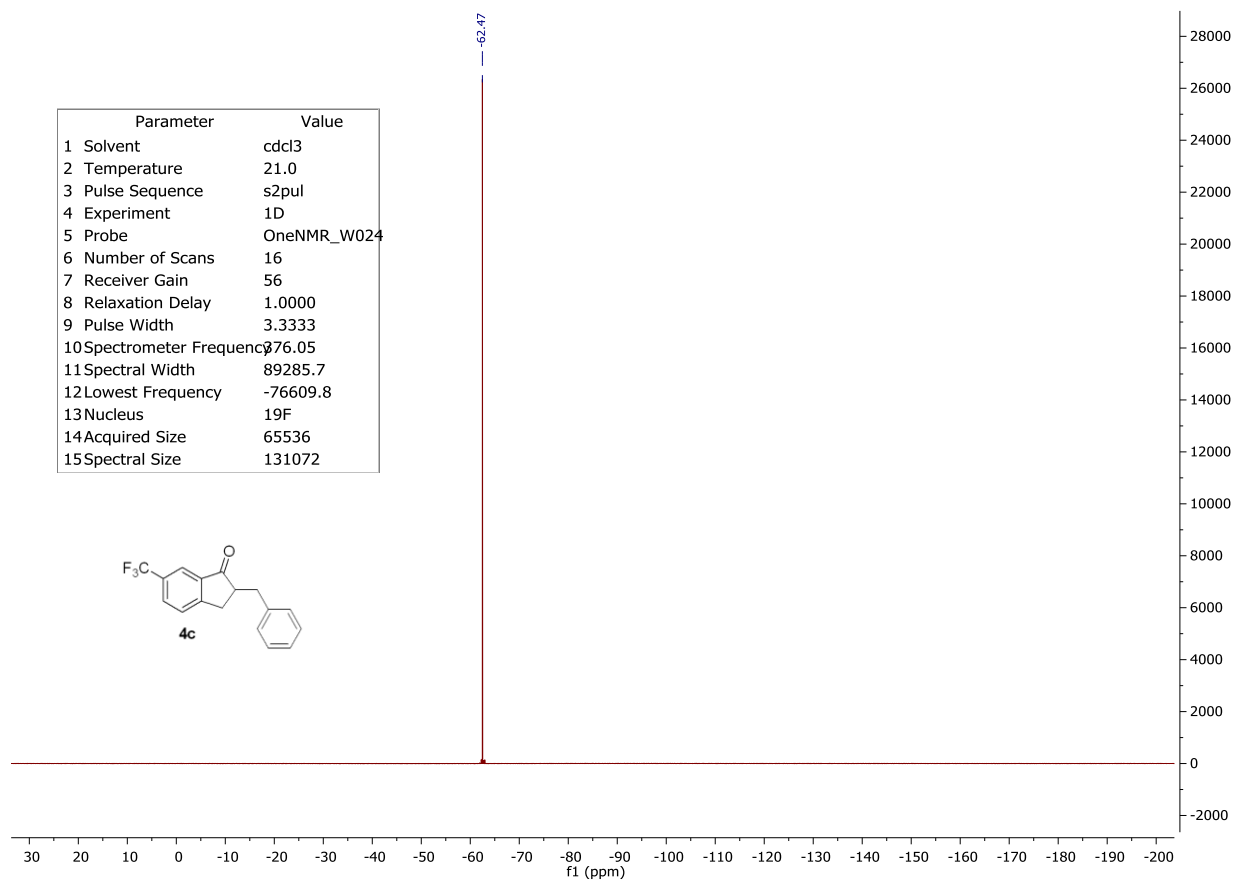

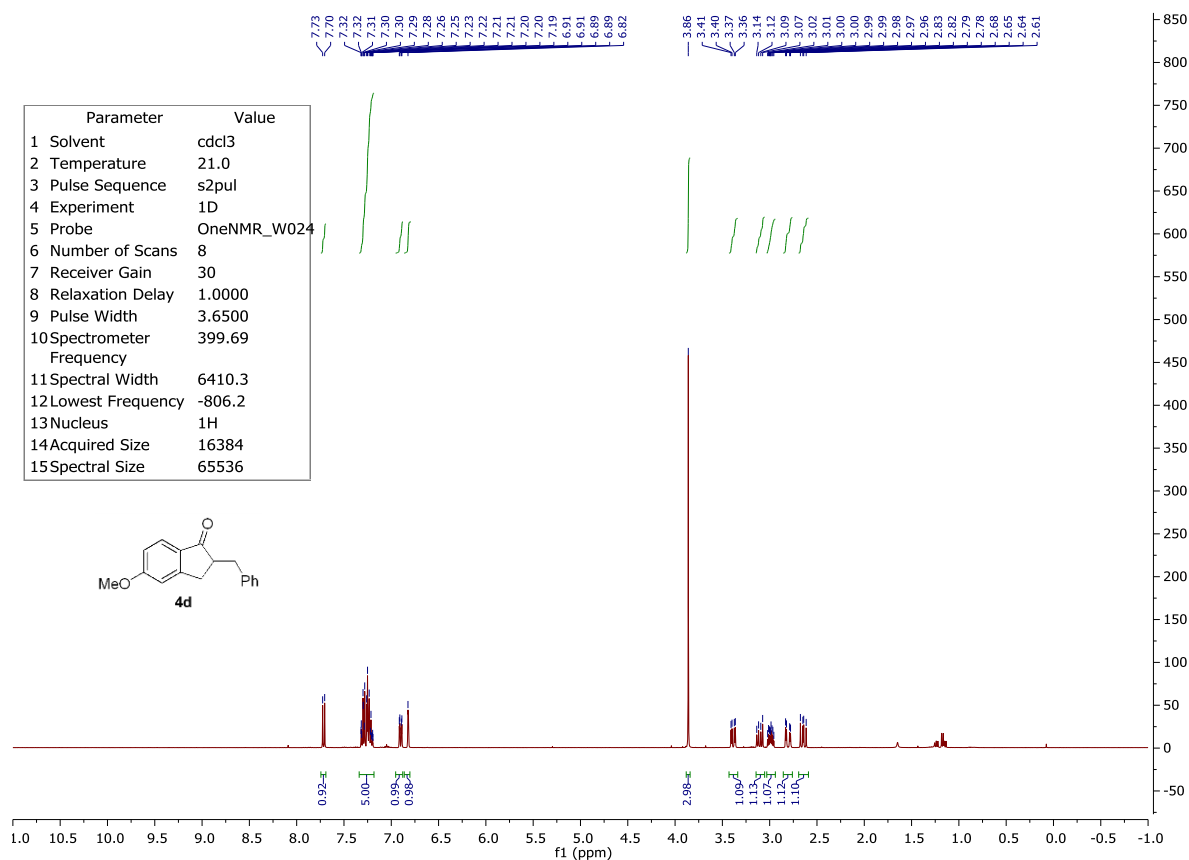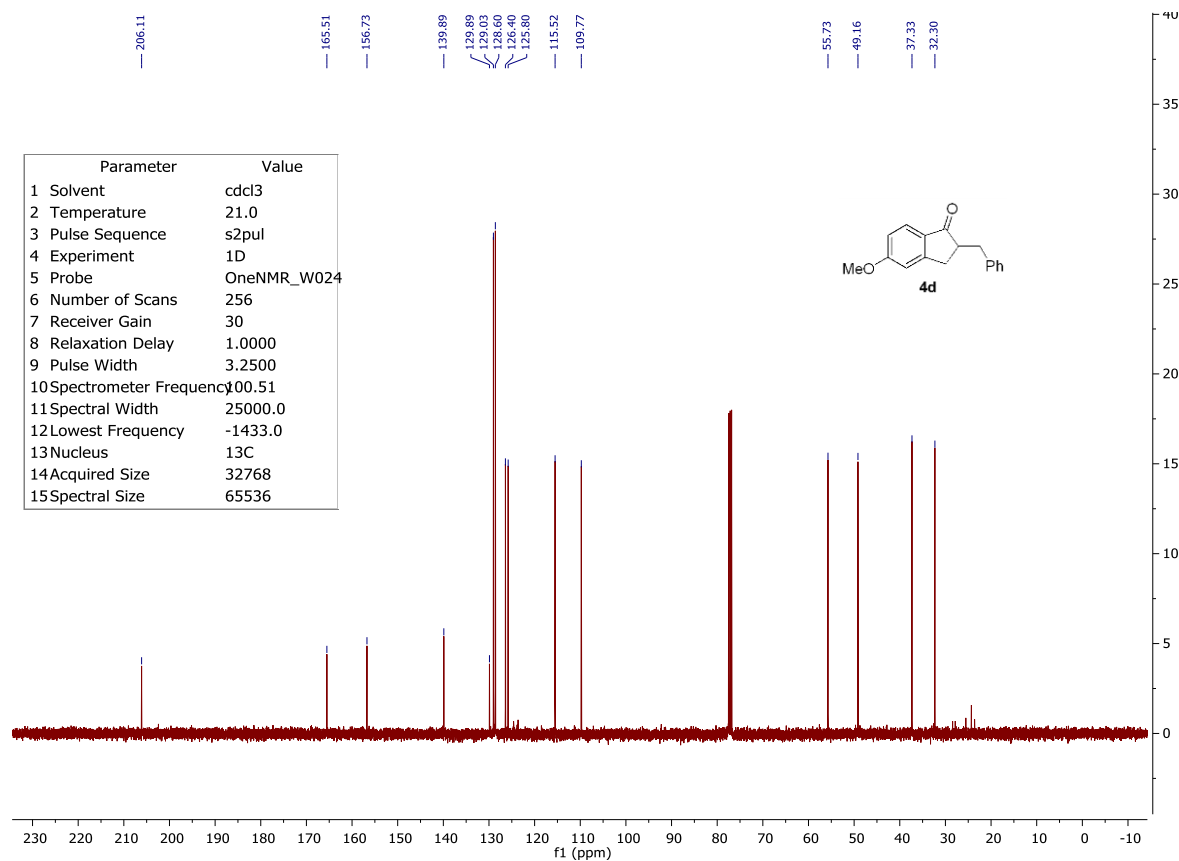

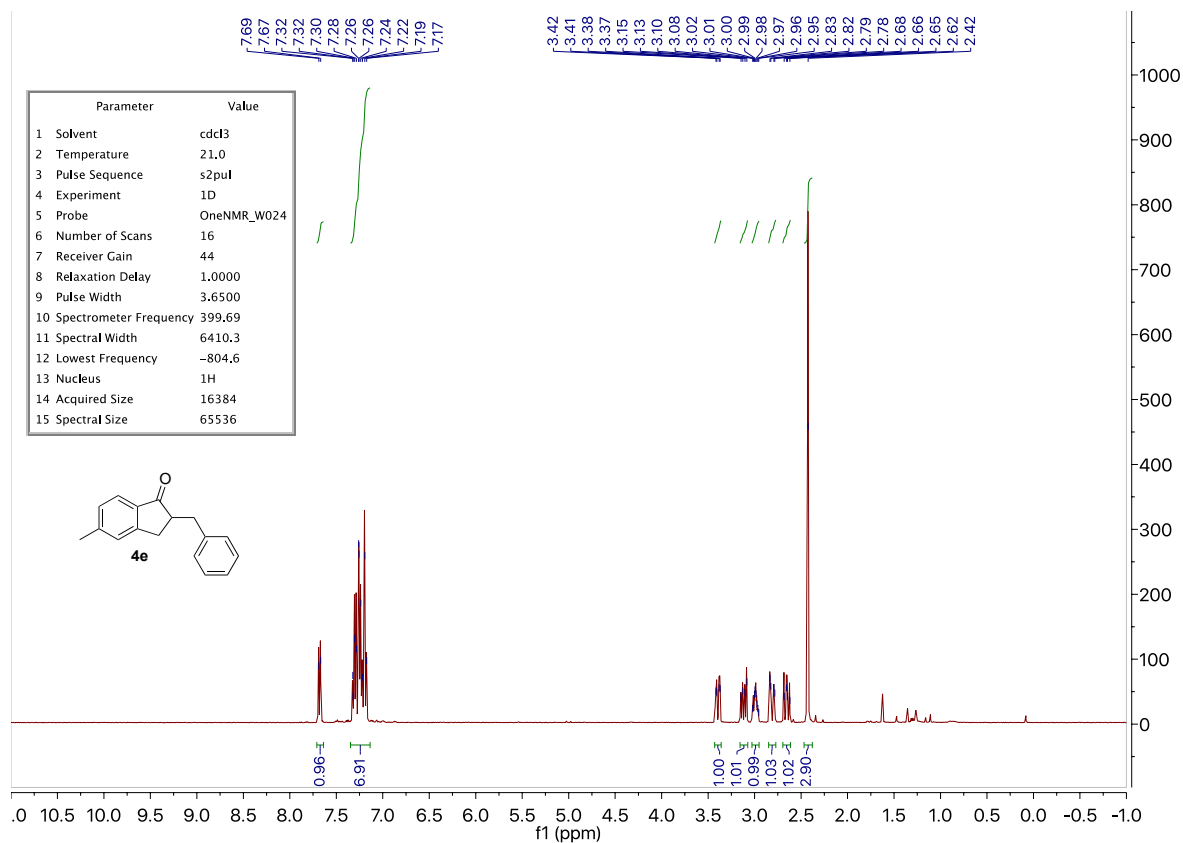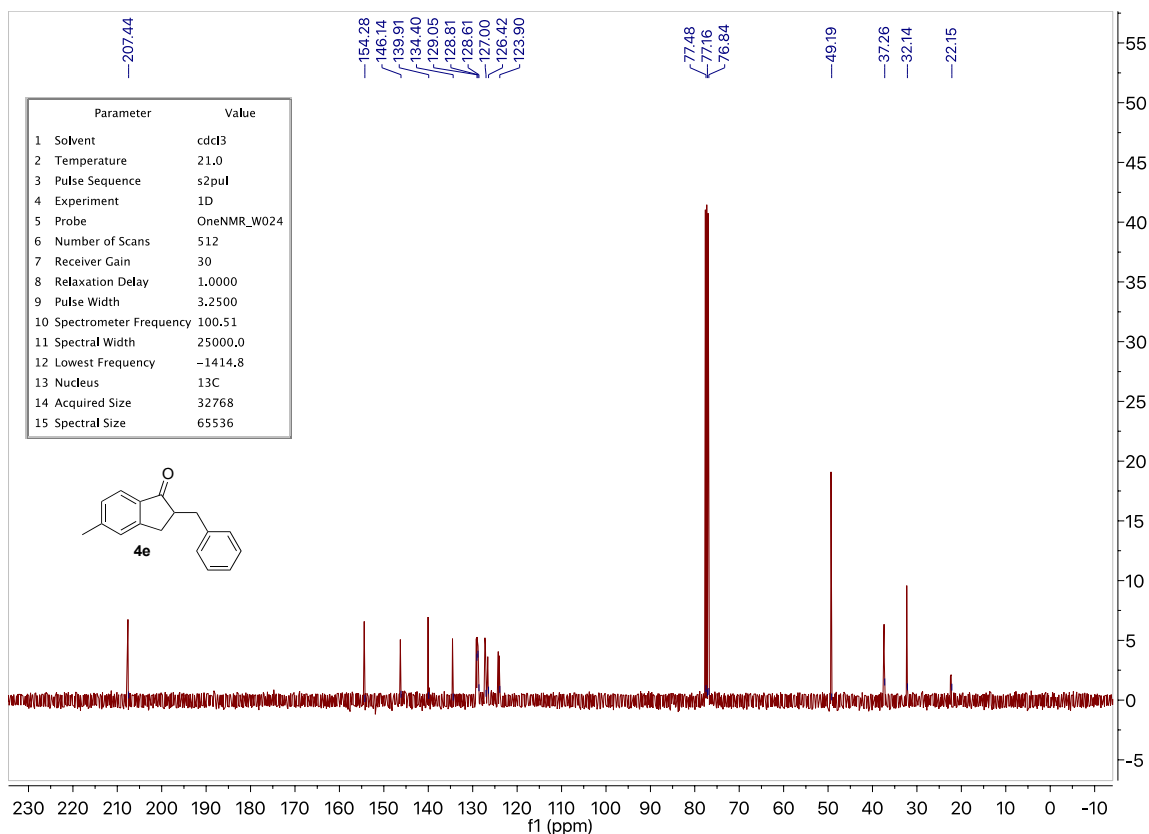



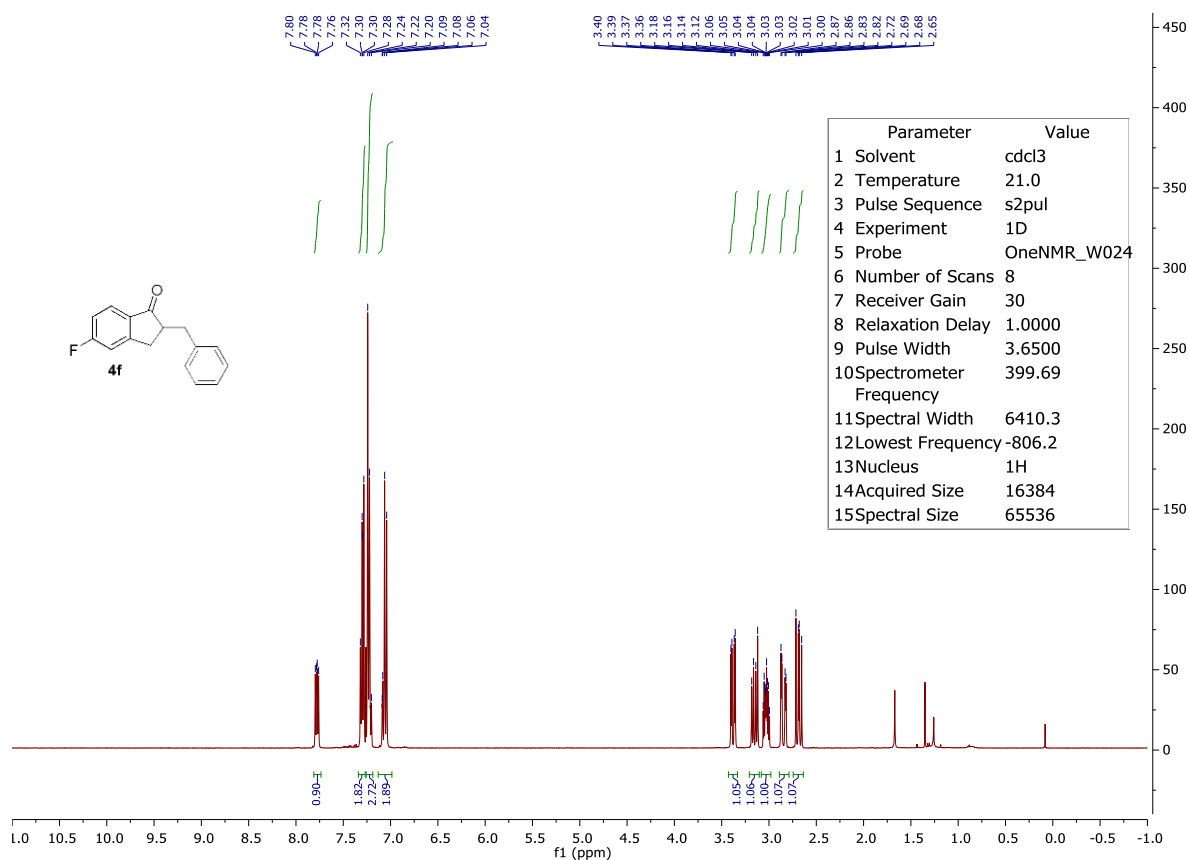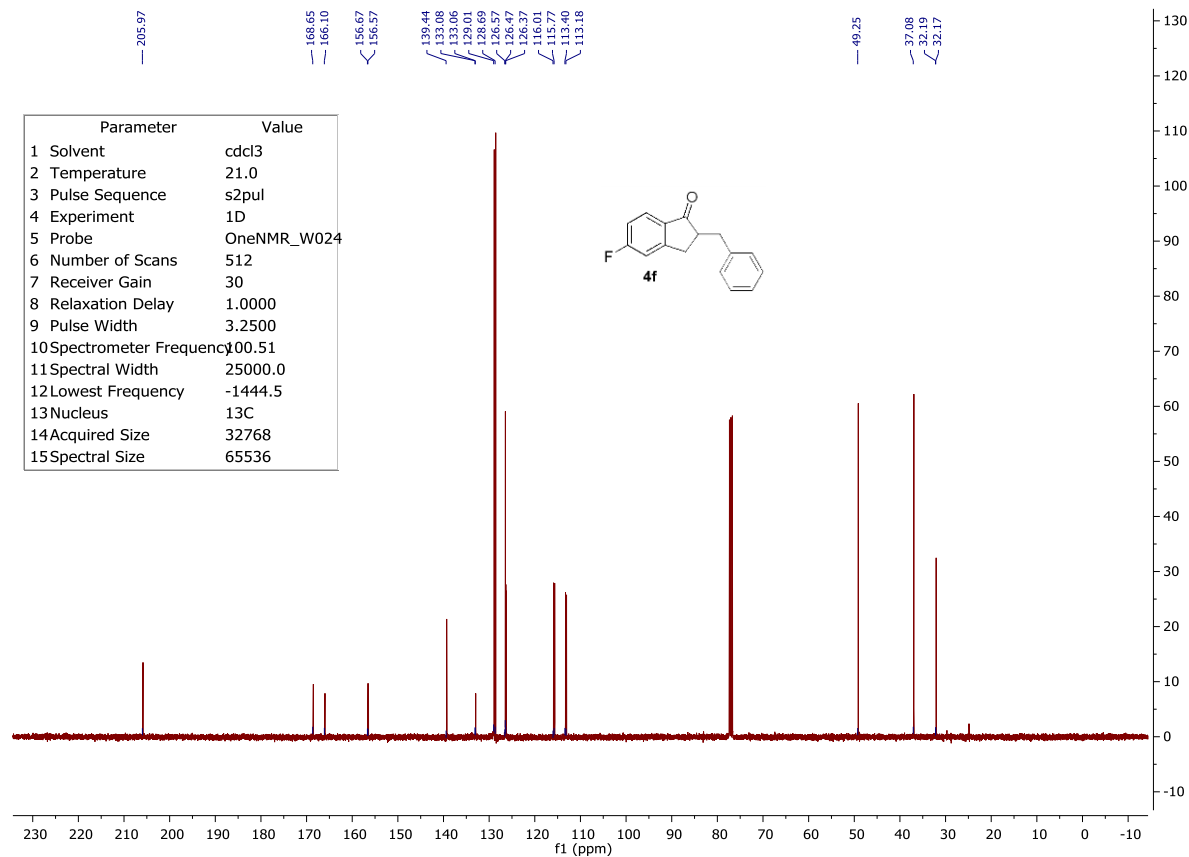

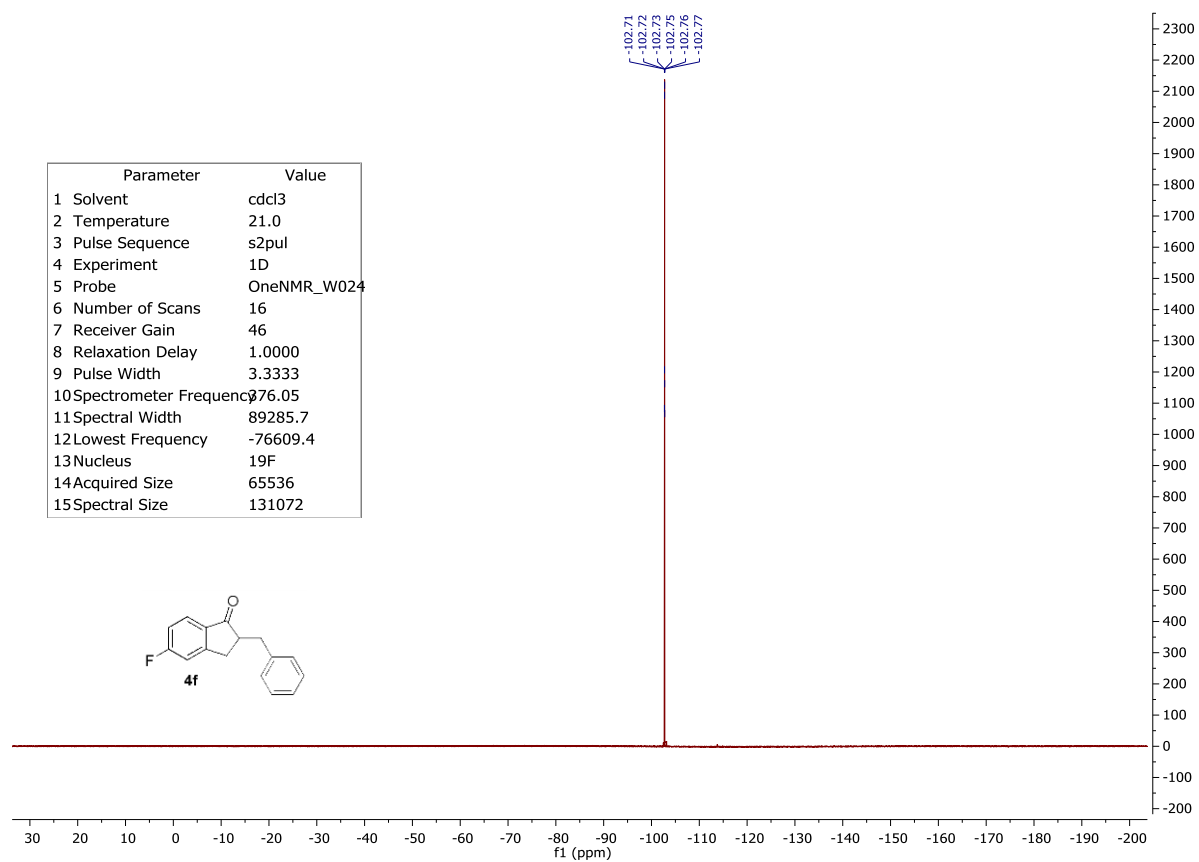

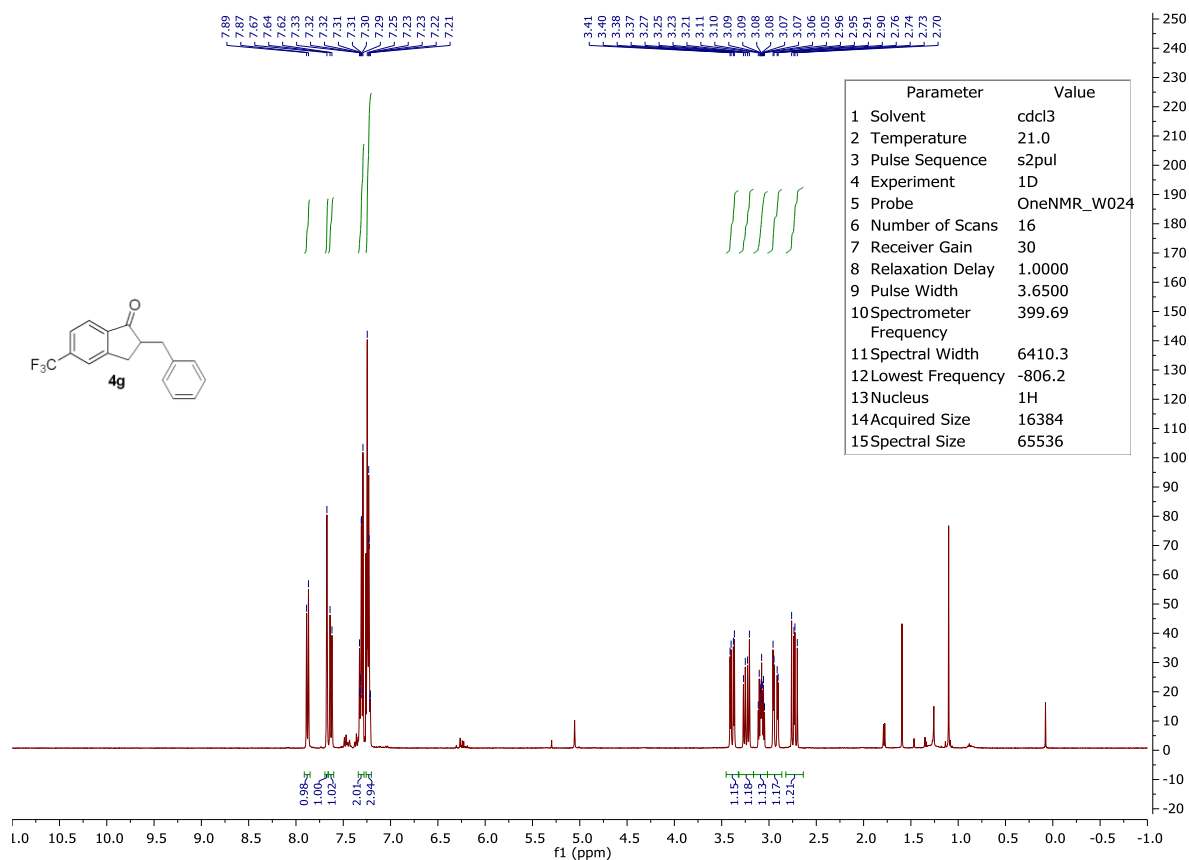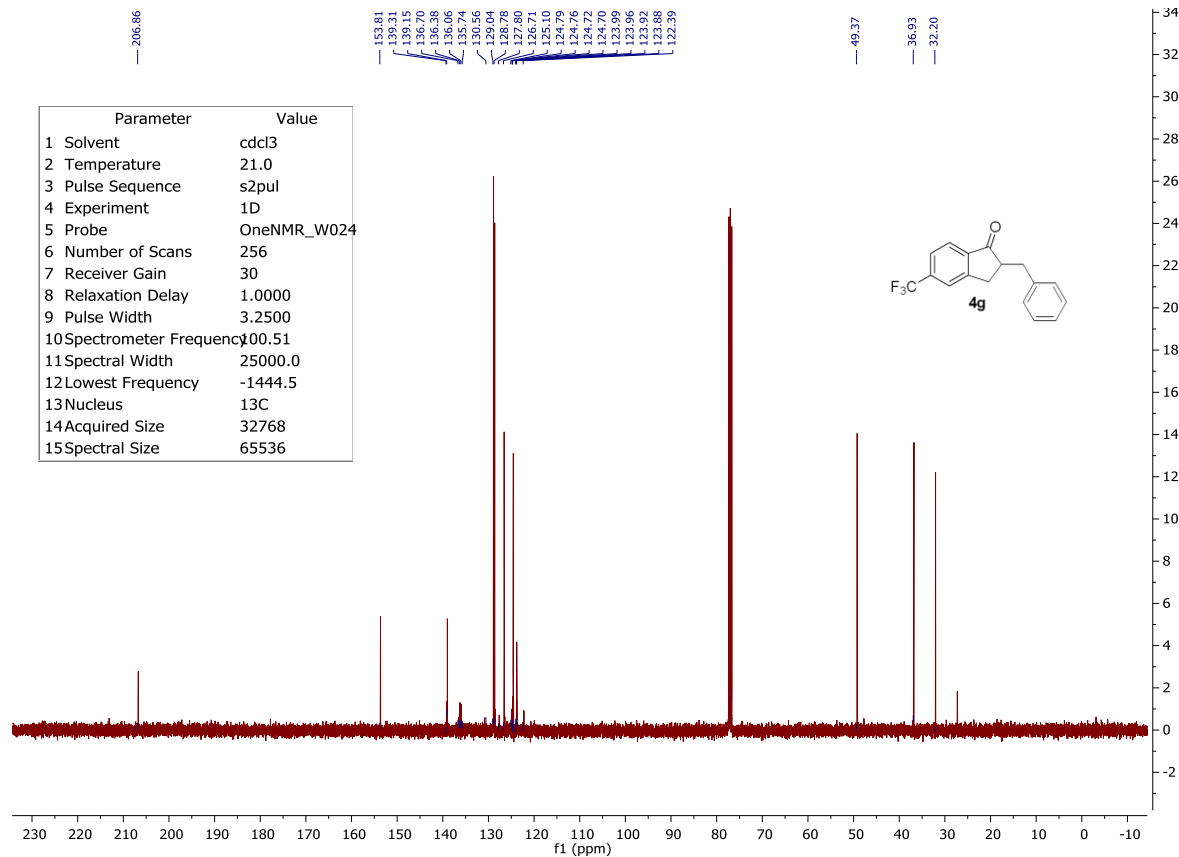

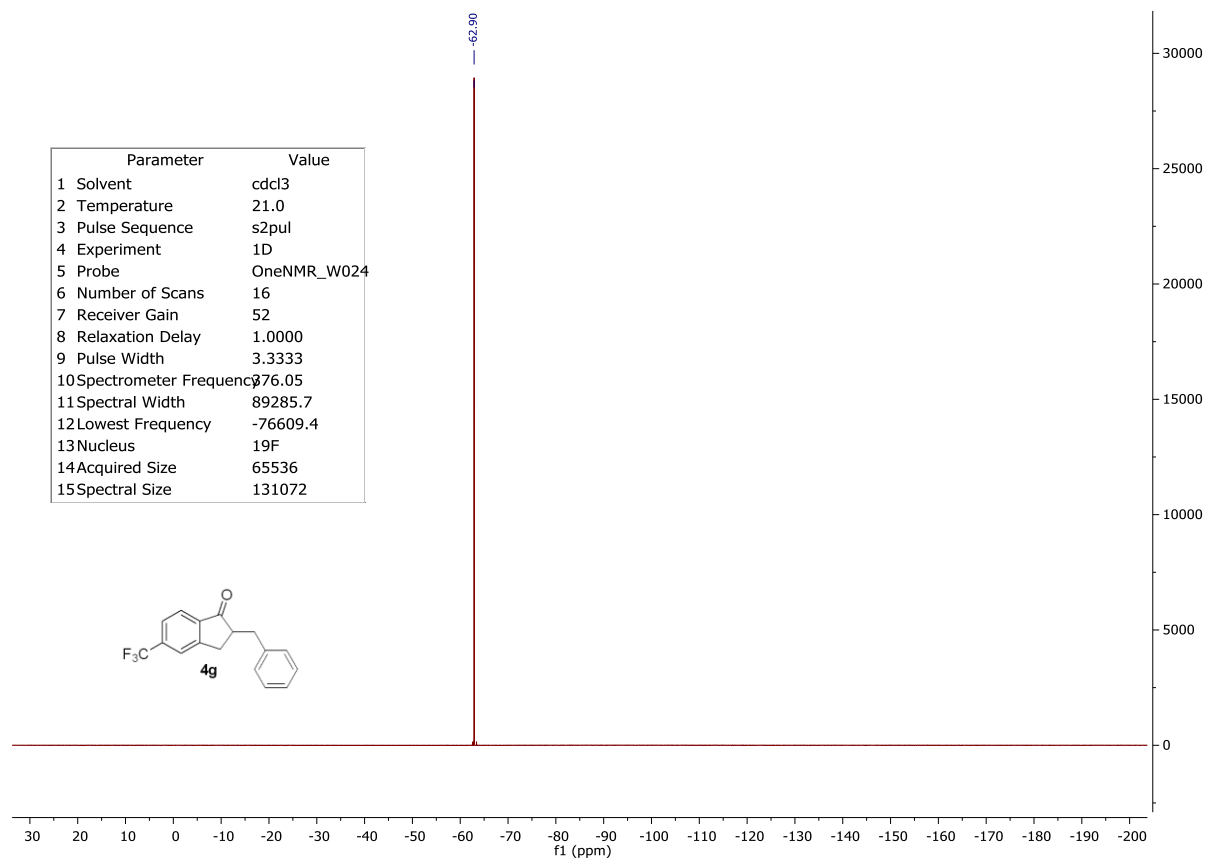

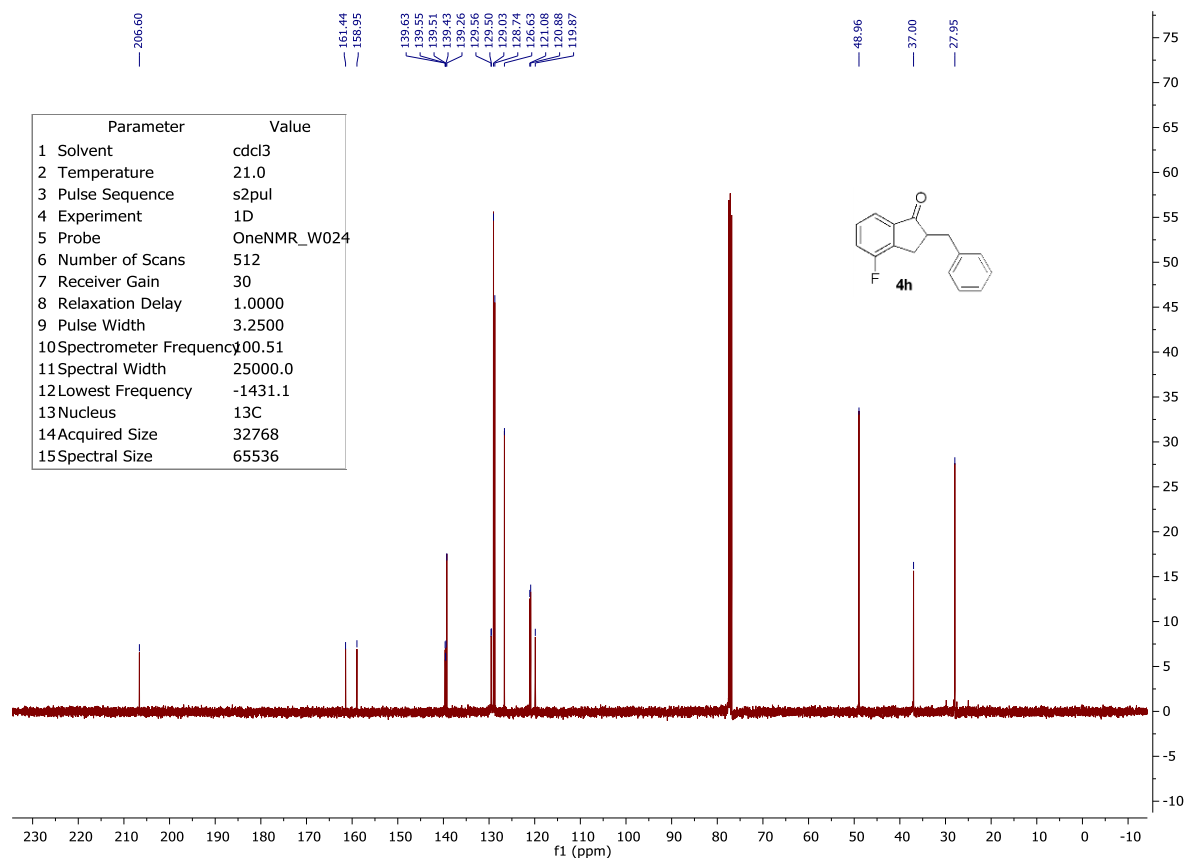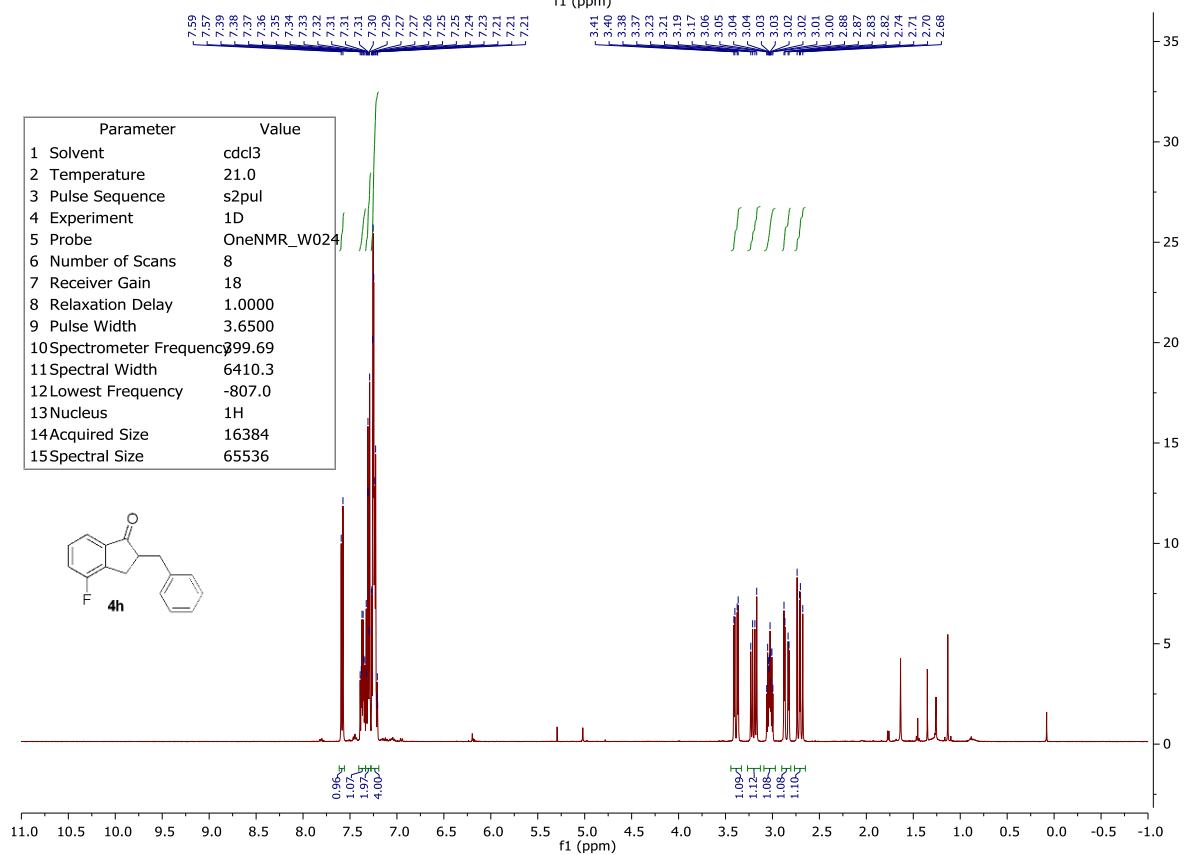

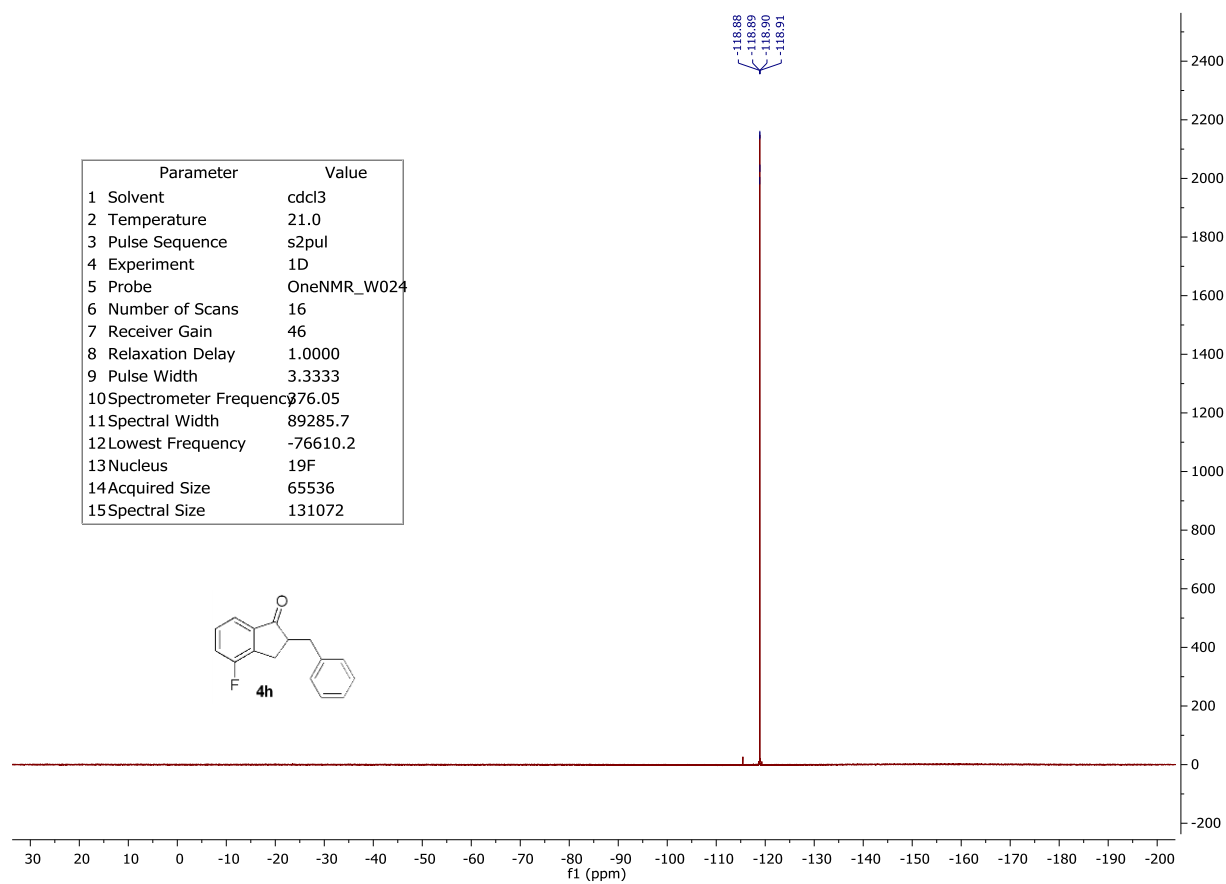

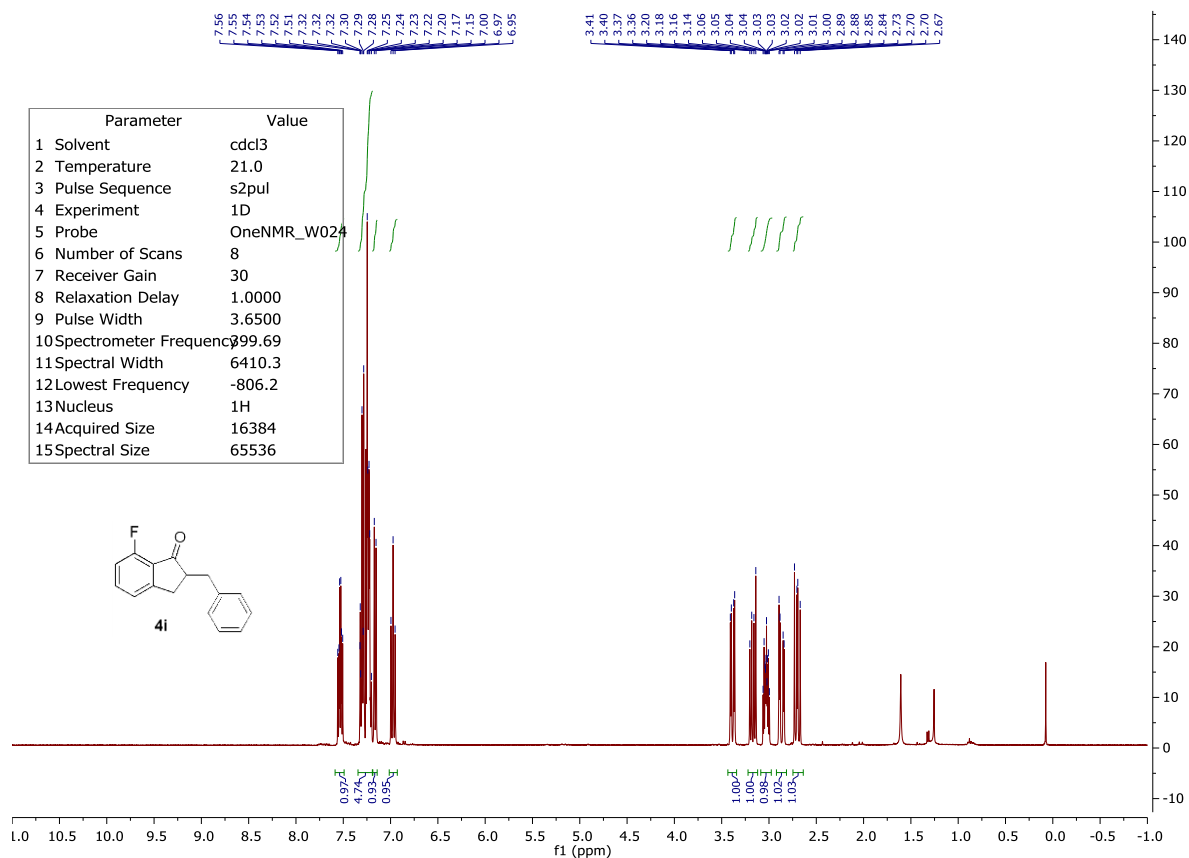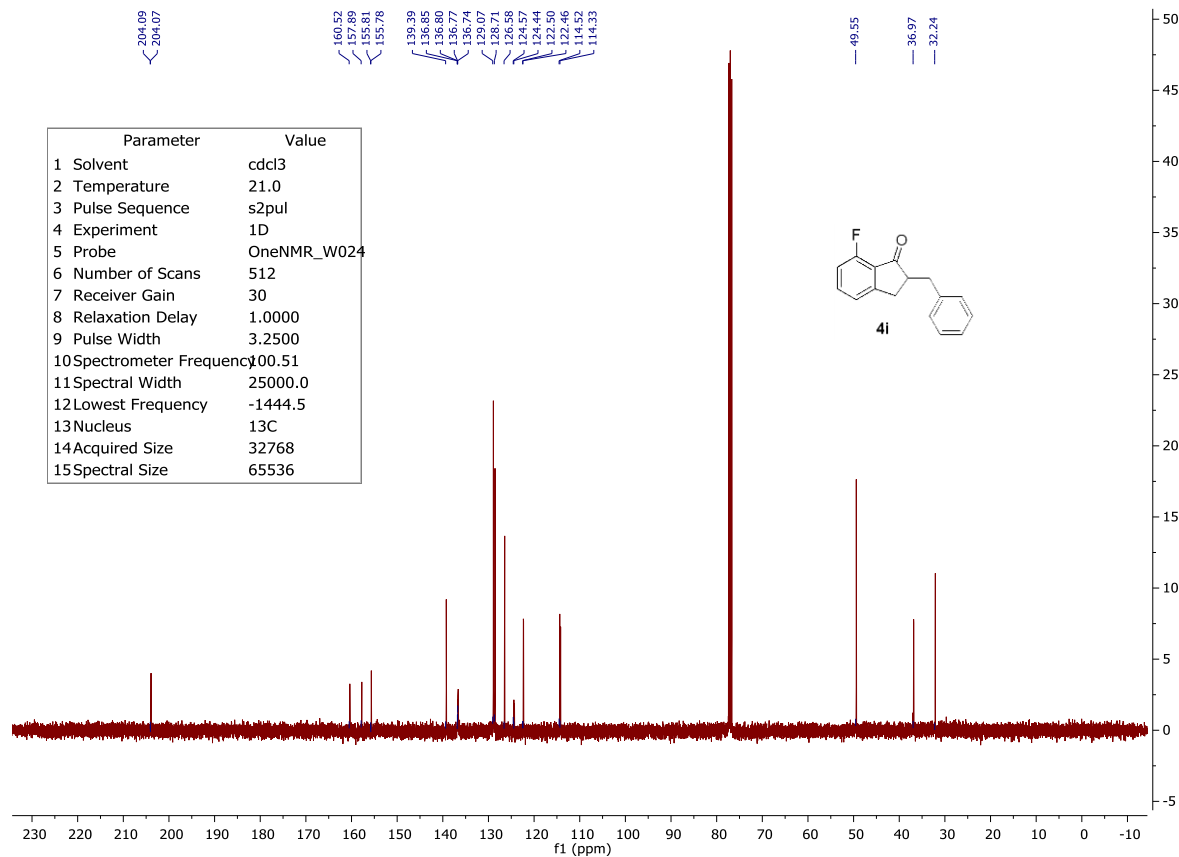

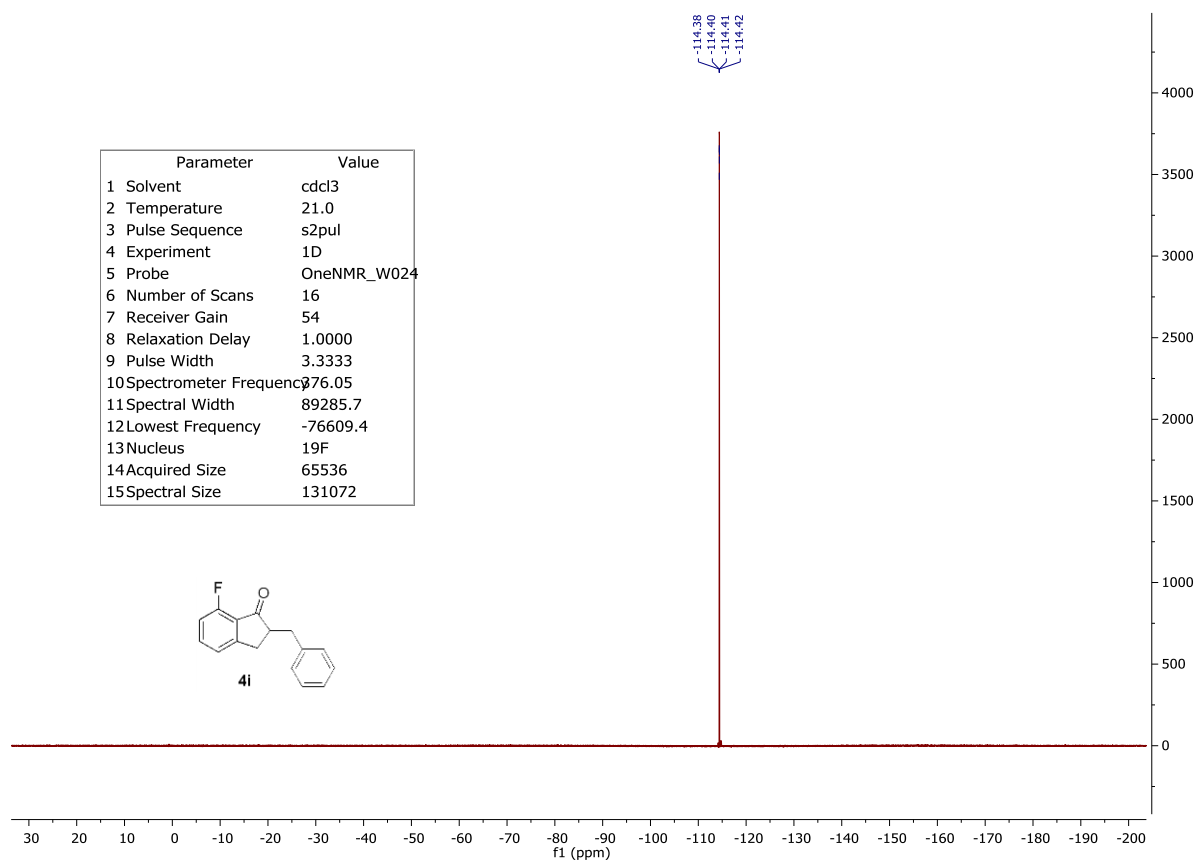



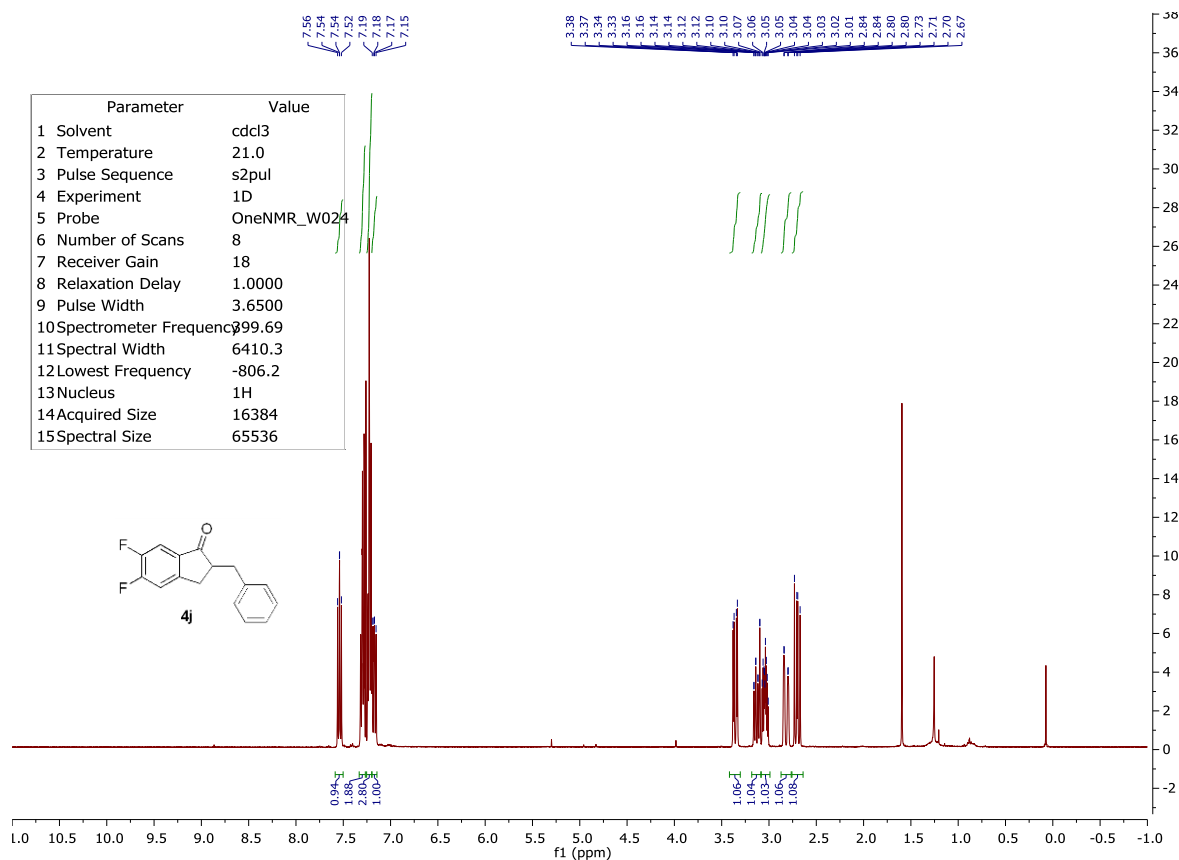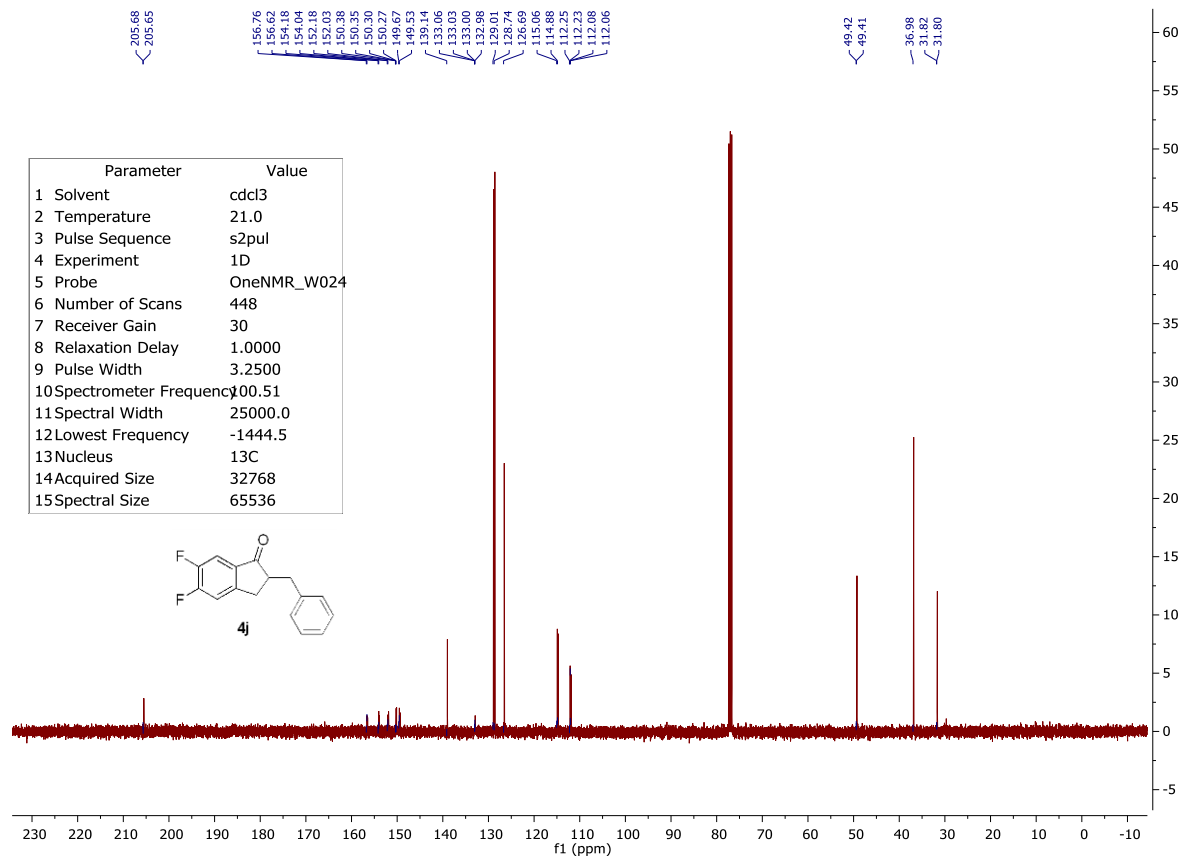

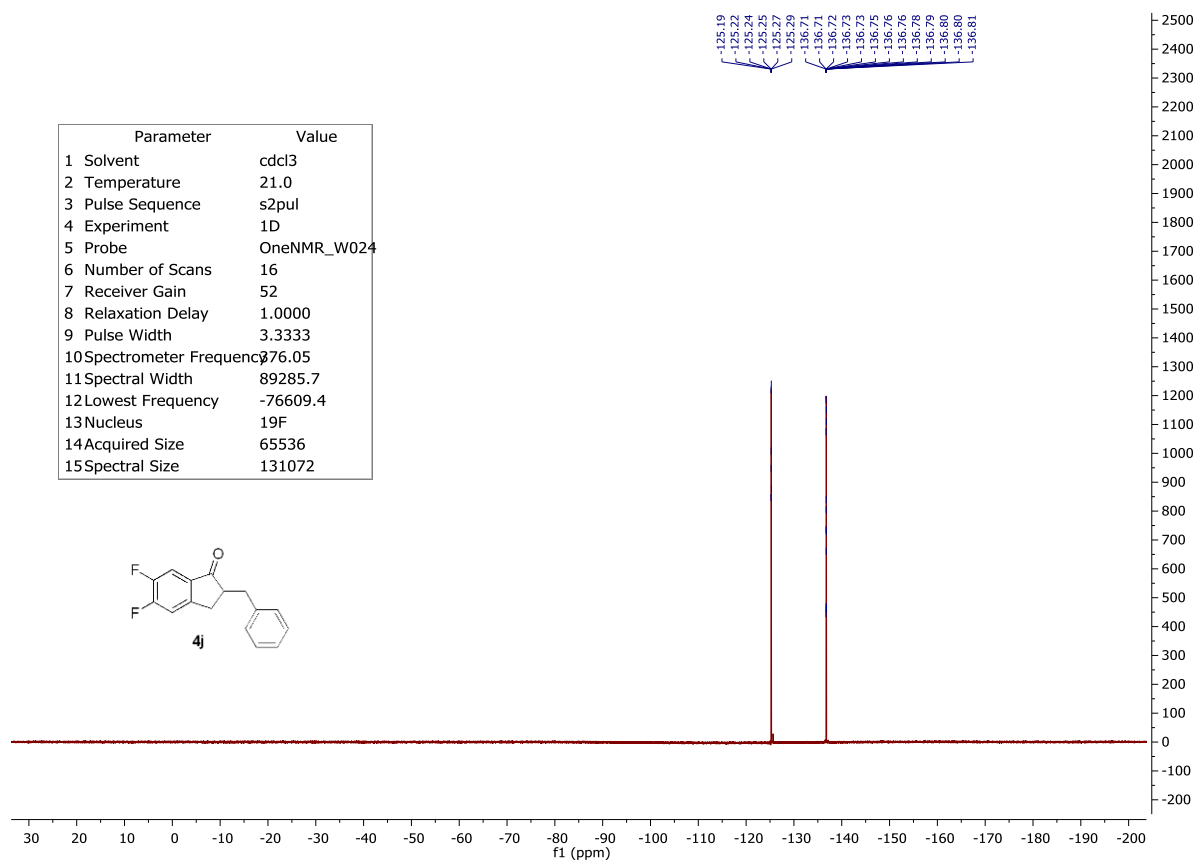

## References

1. Harris, R. K.; Becker, E. D.; De Menezes, S. M. C.; Goodfellow, R.; Granger, P. *Pure Appl. Chem.* **2001**, *73*, 1795-1818.
2. Incerti-Pradillos, C. A.; Kabeshov, M. A.; Malkov, A. V. *Angew. Chem. Int. Ed.* **2013**, *52*, 5338-5341.
3. Ge, S.; Hartwig, J. F. *J. Am. Chem. Soc.* **2011**, *133*, 16330-16333.
